# Supplementary material
Source: PubMed Central journal article supplement (PMC6677245)
Supplement: NIHMS1038683-supplement-ESI.pdf [file NIHMS1038683-supplement-ESI.pdf]

# Supporting Information

## Synergistic Palladium/Enamine Catalysis for Asymmetric Hydrocarbon Functionalization of Unactivated Alkenes with Ketones

Chiyu Wei,<sup>a</sup> Xiaohan Ye,<sup>a</sup> Qingyu Xing,<sup>a</sup> Yong Hu,<sup>c</sup> Yan Xie,<sup>\*b</sup> and Xiaodong Shi<sup>\*a</sup>

<sup>a</sup>*Department of Chemistry, University of South Florida, Tampa, FL 33620, United State.*

<sup>b</sup>*College of Chemistry and Materials Engineering, Quzhou University, Quzhou 324000, China*

<sup>c</sup>*Department of Neonatology, Shanghai Children's Hospital, Shanghai Jiao Tong University, Shanghai, Shanghai 200040, China.*

|                                                               |     |
|---------------------------------------------------------------|-----|
| I. General Methods and Materials                              | S2  |
| II. Extensive screening of catalysts for dicarbonyl compounds | S6  |
| III. Compounds Characterization                               | S7  |
| IV. NMR Spectra Data                                          | S27 |
| V. HPLC Spectra Data                                          | S58 |

## I. General Methods and Materials

All of the reactions dealing with air and/or moisture-sensitive compounds were carried out under an atmosphere of argon using oven/flame-dried glassware and standard syringe/septa techniques. Unless otherwise noted, all commercial reagents and solvents were obtained from the commercial provider and used without further purification.  $^1\text{H}$  NMR and  $^{13}\text{C}$  NMR spectra were recorded on Varian 400 MHz spectrometers. Chemical shifts were reported relative to internal tetramethylsilane ( $\delta$  0.00 ppm) or  $\text{CDCl}_3$  ( $\delta$  7.26 ppm) or DMSO (2.50 ppm) for  $^1\text{H}$  and  $\text{CDCl}_3$  ( $\delta$  77.16 ppm), DMSO (40.00 ppm) for  $^{13}\text{C}$ . Flash column chromatography was performed on 230-430 mesh silica gel. Analytical thin layer chromatography was performed with precoated glass baked plates (250  $\mu$ ) and visualized by fluorescence and by charring after treatment with potassium permanganate stain. HRMS were recorded on Agilent 6540 LC/QTOF spectrometer.

### 1.1 General procedure to synthesize 3a-3n:

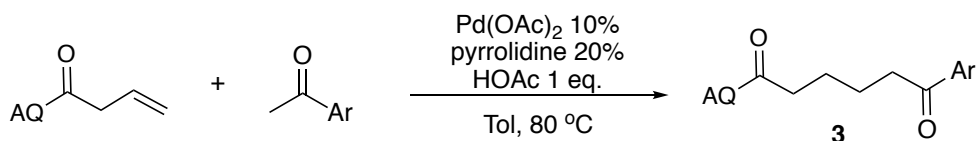

An oven-dried vial was charged with Pd(OAc)<sub>2</sub> (10 mol%, 0.02 mmol), HOAc (1 equiv., 0.2 mmol), ketone (3 equiv., 0.6 mmol) and pyrrolidine (20 mol%, 0.04 mmol). The vial was placed under vacuum and charged with Ar. Alkene (**1a**) (1 equiv., 0.2 mmol), and toluene (1M, 0.2 mL) was added into the vial sequentially under Ar atmosphere. The reaction was run under 80 °C and monitored by TLC. Once the reaction completed, the solvent was removed under vacuum, and the resulting crude mixture was loaded on a silica gel column directly and purified by flash chromatography to give desired product.

### 1.2 General procedure to synthesize 4a-4l:

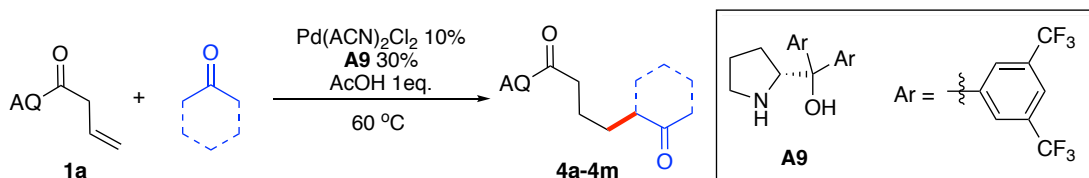

An oven-dried vial was charged with Pd(MeCN)<sub>2</sub>Cl<sub>2</sub> (10 mol%, 0.02 mmol), HOAc (1 equiv., 0.2 mmol), ketone (4 equiv., 0.8 mmol) and **A9** (30 mol%, 0.06 mmol). The vial was placed under vacuum and charged with Ar. Alkene (**1a**) (1 equiv., 0.2 mmol) was added into the vial sequentially under Ar atmosphere. The reaction was run under 60 °C and monitored by TLC. Once the reaction completed, the crude mixture was loaded on a silica gel column directly and purified by flash chromatography to give desired product.

### 1.3 General procedure to synthesize 5a-5c:

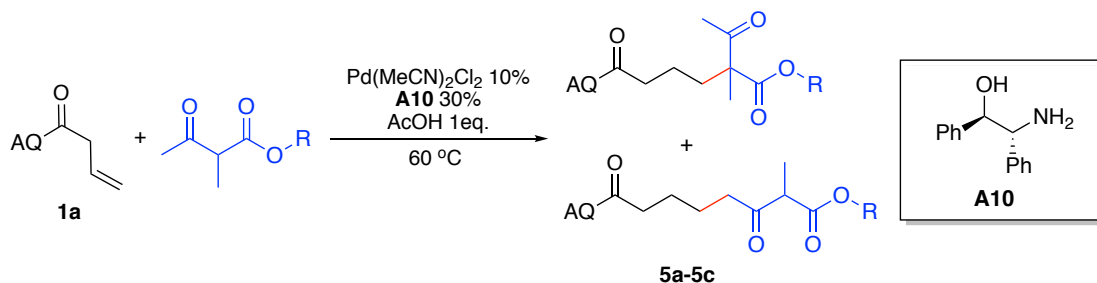

An oven-dried vial was charged with Pd(MeCN)<sub>2</sub>Cl<sub>2</sub> (10 mol%, 0.02 mmol), HOAc (1 equiv., 0.2 mmol), ketone ester (3 equiv., 0.6 mmol) and **A10** (30 mol %, 0.6 mmol). The vial was placed under vacuum and charged with Ar. Alkene (**1a**) (1 equiv., 0.2 mmol) was added into the vial sequentially under Ar atmosphere. The reaction was run under 60 °C and monitored by TLC. Once the reaction completed, the crude mixture was loaded on a silica gel column directly and purified by flash chromatography to give desired product.

### 1.4 Removal of directing group:<sup>1</sup>

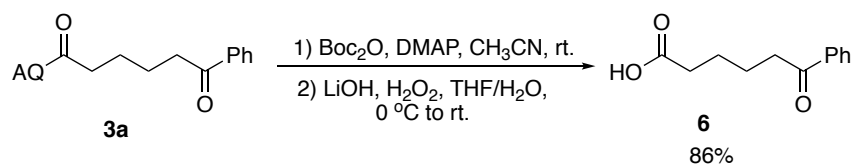

An oven-dried flask was added compound **3a** (1 mmol), Boc<sub>2</sub>O (4 equiv., 4 mmol), DMAP (1.5 equiv., 1.5 mmol), and dry acetonitrile (15 mL) then placed under vacuum and charged with Ar. The reaction was run under room temperature and monitored by TLC. Once the reaction completed, the crude mixture was purified by flash chromatography (Hexane: Ethyl Acetate = 3:1, R<sub>f</sub> = 0.2) on silica gel and the product was used in the next step.

The product from the previous step was employed in THF/ H<sub>2</sub>O (13 mL : 4.5 mL) and cooled to 0 °C, followed by the addition of LiOH (1.1 eq.) and H<sub>2</sub>O<sub>2</sub> (9 eq.). The reaction was run at 0 °C until the reaction was done, then Na<sub>2</sub>S<sub>2</sub>O<sub>3</sub> solution (aq., 1.5 M, 10 mL) was added. The solution was washed with DCM 20 mL twice. The aqueous phase was extracted with EA (25 mL) three times. The organic phase was combined, washed with brine (20 mL) and dried with Na<sub>2</sub>SO<sub>4</sub>, then the solvent was evaporated under vacuum. The crude mixture was purified by flash chromatography (EA : Hexanes = 3:1, R<sub>f</sub> = 0.32) to give the desired product **6** with 86% overall yield for two steps.

### 1.5 Synthesis of N(quinolin-8-yl)but-3-enamide **1a**:

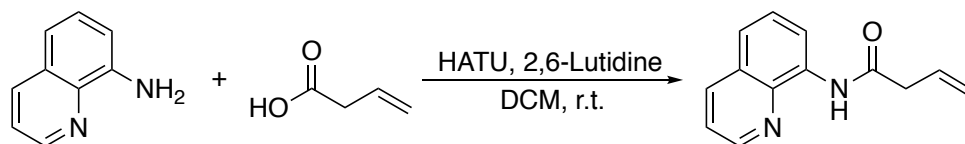

8-Aminoquinoline (10 mmol), vinyl acetic acid (1.3 eq., 13 mmol), and DCM (30 mL) were added in a 100 mL round bottom flask. 2,6-Lutidine (2 eq., 20 mmol) and HATU (1.3 eq., 1.3 mmol) were charged sequentially at r.t. The reaction was monitored by TLC. Upon the reaction completed, H<sub>2</sub>O (80 mL) was added into the mixture and extracted by DCM (3\*40 mL). The organic layer was combined, washed with sat. NaHCO<sub>3</sub> and brine, and then dried over Na<sub>2</sub>SO<sub>4</sub>. The solvent was evaporated under vacuum. The crude mixture was purified by flash chromatography (ethyl acetate: hexanes = 3:1) to give the desired product **1a** (1.87 g, 88% yield) as a yellow oil. The physical and spectroscopic data matched with literature.<sup>2</sup>

### 1.6 Gram-scale synthesis of **3a**:

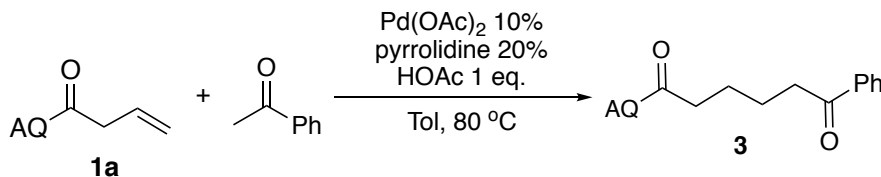

An oven-dried 25mL round-bottom flask was charged with Pd(OAc)<sub>2</sub> (10 mol%, 92 mg, 0.41 mmol), HOAc (1 equiv., 0.24 mL, 4.1 mmol), alkene (**1a**) (1 equiv., 870 mg, 4.1 mmol), acetophenone (3 equiv., 1.48 g, 12.3 mmol), pyrrolidine (20 mol%, 68 μL, 0.82



mmol) and toluene (1M, 4.1 mL). The vial was placed under vacuum and charged with Ar. The reaction was run under 80 °C and monitored by TLC. Once the reaction completed, the solvent was evaporated by vacuum and the crude mixture was purified by flash chromatography (Hexane: Ethyl Acetate = 3:1) on silica gel to give desired product **3a** (1.27 g, 94%).

## II. Extensive screening of catalysts for dicarbonyl compounds:<sup>a</sup>

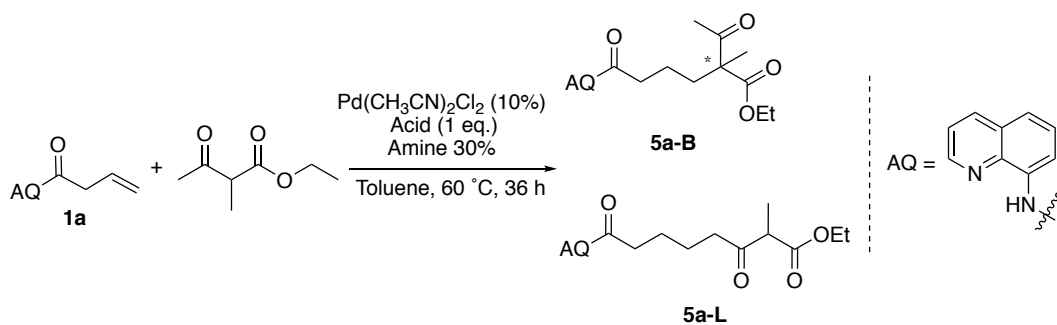

| Entry          | Acid         | Amine/Ligand                | Conv. | Yield | ee% | B/L     |
|----------------|--------------|-----------------------------|-------|-------|-----|---------|
| 1              | HOAc         |                             | 52%   | 46%   | <5% | 86 : 14 |
| 2              | HOAc         |                             | 47%   | 43%   | 40% | 50 : 50 |
| 3              | HOAc         |                             | 64%   | 61%   | 62% | 47 : 53 |
| 4              | HOAc         |                             | <10%  | <10%  | -   | -       |
| 5              |              |                             | 69%   | 63%   | 48% | 43 : 57 |
| 6              | HOAc (2 eq.) |                             | 62%   | 60%   | 52% | 45 : 55 |
| 7 <sup>b</sup> | HOAc         |                             | 100%  | 99%   | 63% | 47 : 53 |
| 8              | HOAc         | MOX ligand <sup>c</sup>     | 74%   | 70%   | 12% | 90 : 10 |
| 9              | HOAc         | and MOX ligand <sup>c</sup> | 40%   | 39%   | 20% | 74 : 26 |
| 10             | HOAc         | and s-BINAP                 | 10%   | 0%    | -   | -       |

Reaction conditions: <sup>a</sup> Reaction conditions: Pd(CH<sub>3</sub>CN)<sub>2</sub>Cl<sub>2</sub> (10 mol%), ligand **A9** (30 mol%), AcOH (1 eq.), 36 hours. Yield were determined by <sup>1</sup>H NMR using 1,3,5-trimethoxybenzene as internal standard. The dr and ee was determined by HPLC. <sup>b</sup> neat. <sup>c</sup> See ref 4

### III. Compounds Characterization

**3a**

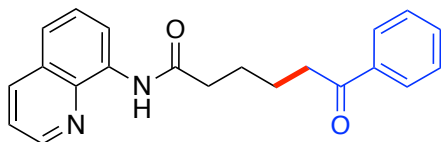

#### **6-oxo-6-phenyl-N-(quinolin-8-yl)hexanamide**

**3a** was prepared following the General Procedure **1.1** and purified by flash Chromatography (hexanes/ethyl acetate = 3:1,  $R_f$  = 0.21) to give white solid (62 mg, 94% yield). 36 hours. MP: 85 °C.

**$^1\text{H NMR}$**  (400 MHz,  $\text{CDCl}_3$ )  $\delta$  9.83 (s, 1H), 8.96 – 8.62 (m, 2H), 8.16 (dd,  $J$  = 8.2, 1.8 Hz, 1H), 8.02 – 7.91 (m, 2H), 7.69 – 7.35 (m, 6H), 3.07 (t,  $J$  = 6.5 Hz, 2H), 2.64 (t,  $J$  = 6.8 Hz, 2H), 2.00 – 1.81 (m, 4H).

**$^{13}\text{C NMR}$**  (101 MHz,  $\text{CDCl}_3$ )  $\delta$  200.00, 171.45, 148.26, 138.39, 137.03, 136.45, 134.57, 133.10, 128.69, 128.07, 127.48, 121.61, 121.51, 116.54, 56.35, 38.35, 38.06, 25.35, 23.92.

**HRMS** (ESI): Calculated for  $\text{C}_{21}\text{H}_{21}\text{N}_2\text{O}_2$  ( $\text{M}+\text{H}$ ) $^+$ : 333.1598, found: 333.1601.

**3b**

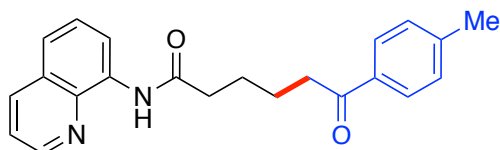

#### **6-oxo-N-(quinolin-8-yl)-6-(p-tolyl)hexanamide**

**3b** was prepared following the General Procedure **1.1** and purified by flash Chromatography (hexanes/ethyl acetate = 3:1,  $R_f$  = 0.29) to give white solid (66 mg, 96% yield). 36 hours. MP: 80 °C.

**$^1\text{H NMR}$**  (400 MHz,  $\text{CDCl}_3$ )  $\delta$  9.82 (s, 1H), 8.78 (m, 2H), 8.15 (d,  $J$  = 8.2 Hz, 1H), 7.85 (d,  $J$  = 7.8 Hz, 2H), 7.58 – 7.38 (m, 3H), 7.23 (d,  $J$  = 7.8 Hz, 2H), 3.03 (t,  $J$  = 6.6 Hz, 2H), 2.62 (t,  $J$  = 6.8 Hz, 2H), 2.39 (s, 3H), 2.08 – 1.78 (m, 4H).

**$^{13}\text{C NMR}$**  (101 MHz,  $\text{CDCl}_3$ )  $\delta$  199.74, 171.53, 148.25, 143.82, 138.44, 136.46, 134.61, 129.36, 128.28, 128.04, 127.52, 121.70, 121.51, 116.55, 38.28, 38.13, 25.43, 24.07, 21.74.

HRMS (ESI): Calculated for C<sub>22</sub>H<sub>23</sub>N<sub>2</sub>O<sub>2</sub> (M+H)<sup>+</sup>: 347.1754, found: 347.1762.

**3c**

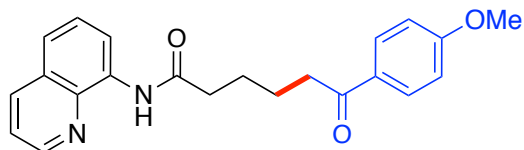

**6-(4-methoxyphenyl)-6-oxo-N-(quinolin-8-yl)hexanamide**

**3c** was prepared following the General Procedure **1.1** and purified by flash Chromatography (hexanes/ethyl acetate = 3:1, R<sub>f</sub> = 0.13) to give white solid (68 mg, 94% yield). 36 hours. MP: 73 °C.

<sup>1</sup>H NMR (400 MHz, CDCl<sub>3</sub>) δ 9.81 (s, 1H), 8.82 – 8.71 (m, 2H), 8.13 (d, *J* = 8.2 Hz, 1H), 7.92 (d, *J* = 8.4 Hz, 2H), 7.57 – 7.36 (m, 3H), 6.89 (d, *J* = 8.4 Hz, 2H), 3.83 (s, 3H), 2.99 (t, *J* = 6.5 Hz, 2H), 2.61 (t, *J* = 6.8 Hz, 2H), 1.98 – 1.81 (m, 4H).

<sup>13</sup>C NMR (101 MHz, CDCl<sub>3</sub>) δ 198.62, 171.50, 163.44, 148.21, 138.39, 136.42, 134.57, 130.37, 130.13, 128.00, 127.46, 121.67, 121.48, 116.49, 113.76, 55.52, 38.08, 38.00, 25.42, 24.16.

HRMS (ESI): Calculated for C<sub>22</sub>H<sub>22</sub>N<sub>2</sub>O<sub>3</sub> (M+H)<sup>+</sup>: 363.1703, found: 363.1707

**3d**

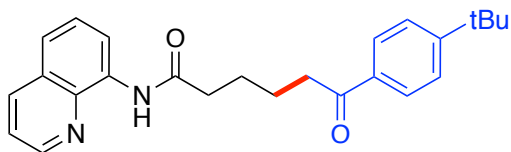

**6-(4-(tert-butyl)phenyl)-6-oxo-N-(quinolin-8-yl)hexanamide**

**3d** was prepared following the General Procedure **1.1** and purified by flash Chromatography (hexanes/ethyl acetate = 3:1, R<sub>f</sub> = 0.36) to give white solid (72 mg, 93% yield). 36 hours. MP: 58 °C.

<sup>1</sup>H NMR (400 MHz, CDCl<sub>3</sub>) δ 9.83 (s, 1H), 8.79 (m, 2H), 8.19 – 8.11 (m, 1H), 7.90 (d, *J* = 8.2 Hz, 2H), 7.60 – 7.38 (m, 5H), 3.04 (t, *J* = 6.5 Hz, 2H), 2.63 (t, *J* = 6.8 Hz, 2H), 2.05 – 1.85 (m, 4H), 1.33 (s, 9H).

$^{13}\text{C}$  NMR (101 MHz,  $\text{CDCl}_3$ )  $\delta$  199.67, 171.45, 156.69, 148.18, 138.36, 136.39, 134.55, 134.44, 128.07, 127.97, 127.43, 125.55, 121.64, 121.46, 116.47, 38.23, 38.05, 35.12, 31.15, 25.37, 24.03.

HRMS (ESI): Calculated for  $\text{C}_{25}\text{H}_{29}\text{N}_2\text{O}_2$  ( $\text{M}+\text{H}$ ) $^+$ : 389.2224, found: 389.2228.

**3e**

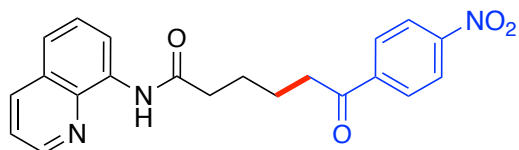

**6-(4-nitrophenyl)-6-oxo-N-(quinolin-8-yl)hexanamide**

**3e** was prepared following the General Procedure **1.1** and purified by flash Chromatography (hexanes/ethyl acetate = 3:1,  $R_f$  = 0.13) to give yellow solid (69 mg, 91% yield). 36 hours. MP: 143 °C.

$^1\text{H}$  NMR (400 MHz,  $\text{CDCl}_3$ )  $\delta$  9.82 (s, 1H), 8.81 (d,  $J$  = 4.1 Hz, 1H), 8.76 (d,  $J$  = 6.8 Hz, 1H), 8.27 (d,  $J$  = 8.5 Hz, 2H), 8.17 (d,  $J$  = 8.2 Hz, 1H), 8.09 (d,  $J$  = 8.4 Hz, 2H), 7.60 – 7.40 (m, 3H), 3.17 – 3.05 (m, 2H), 2.64 (d,  $J$  = 6.6 Hz, 2H), 2.00 – 1.87 (m, 4H).

$^{13}\text{C}$  NMR (101 MHz,  $\text{CDCl}_3$ )  $\delta$  198.34, 171.27, 150.32, 148.32, 148.19, 141.38, 138.37, 136.53, 134.50, 129.08, 128.03, 127.40, 123.90, 121.65, 116.46, 38.91, 37.89, 25.10, 23.59.

HRMS (ESI): Calculated for  $\text{C}_{21}\text{H}_{20}\text{N}_3\text{O}_4$  ( $\text{M}+\text{H}$ ) $^+$ : 378.1448, found: 378.1454

**3f**

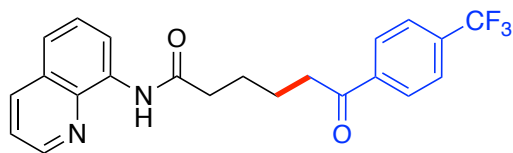

**6-oxo-N-(quinolin-8-yl)-6-(4-(trifluoromethyl)phenyl)hexanamide**

**3f** was prepared following the General Procedure **1.1** and purified by flash Chromatography (hexanes/ethyl acetate = 3:1,  $R_f$  = 0.27) to give white solid (73 mg, 91% yield). 36 hours. MP: 89 °C.

**<sup>1</sup>H NMR** (400 MHz, CDCl<sub>3</sub>) δ 9.82 (s, 1H), 8.84 – 8.69 (m, 2H), 8.16 (d, *J* = 8.3 Hz, 1H), 8.04 (d, *J* = 8.0 Hz, 2H), 7.70 (d, *J* = 8.1 Hz, 2H), 7.57 – 7.40 (m, 3H), 3.08 (t, *J* = 6.3 Hz, 2H), 2.63 (t, *J* = 6.8 Hz, 2H), 2.01 – 1.85 (m, 4H).

**<sup>13</sup>C NMR** (101 MHz, CDCl<sub>3</sub>) δ 198.88, 171.31, 148.17, 139.59, 138.34, 136.44, 134.50, 134.26 (q, *J* = 32.6 Hz), 128.37, 127.99, 127.44, 125.65, 123.69 (q, *J* = 274.0 Hz), 121.72, 121.62, 116.45, 38.61, 37.91, 25.15, 23.64.

**<sup>19</sup>F NMR** (376 MHz, CDCl<sub>3</sub>) δ -63.16.

**HRMS** (ESI): Calculated for C<sub>22</sub>H<sub>20</sub>N<sub>2</sub>O<sub>2</sub>F<sub>3</sub> (M+H)<sup>+</sup>: 401.1471, found: 401.1477

**3g**

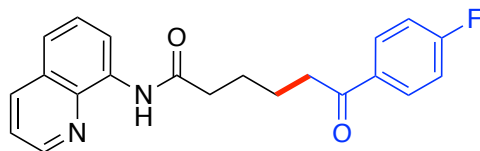

**6-(4-fluorophenyl)-6-oxo-N-(quinolin-8-yl)hexanamide**

**3g** was prepared following the General Procedure **1.1** and purified by flash Chromatography (hexanes/ethyl acetate = 3:1, *R<sub>f</sub>* = 0.20) to give white solid (64 mg, 92% yield). 36 hours. MP: 86 °C.

**<sup>1</sup>H NMR** (400 MHz, CDCl<sub>3</sub>) δ 9.82 (s, 1H), 8.85 – 8.71 (m, 2H), 8.16 (d, *J* = 8.2 Hz, 1H), 7.98 (dd, *J* = 8.7, 5.5 Hz, 2H), 7.58 – 7.39 (m, 3H), 7.11 (t, *J* = 8.6 Hz, 2H), 3.03 (t, *J* = 6.6 Hz, 2H), 2.63 (t, *J* = 6.8 Hz, 2H), 1.98 – 1.82 (m, 4H).

**<sup>13</sup>C NMR** (101 MHz, CDCl<sub>3</sub>) δ 198.31, 171.37, 165.69 (d, *J* = 254.3 Hz), 148.16, 138.34, 136.40, 134.51, 133.40, 130.71 (d, *J* = 7.4 Hz), 127.97, 127.44, 121.61, 121.52 (d, *J* = 4.0 Hz), 116.44, 115.65 (d, *J* = 21.4 Hz), 38.22, 37.97, 25.26, 23.85.

**<sup>19</sup>F NMR** (376 MHz, CDCl<sub>3</sub>) δ -105.56, -105.57, -105.58, -105.60, -105.60, -105.61, -105.62, -105.63.

**HRMS** (ESI): Calculated for C<sub>21</sub>H<sub>20</sub>N<sub>2</sub>O<sub>2</sub>F (M+H)<sup>+</sup>: 351.1503, found: 351.1509

**3h**

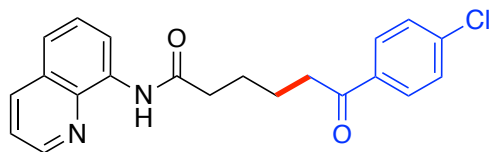

### 6-(4-chlorophenyl)-6-oxo-N-(quinolin-8-yl)hexanamide

**3h** was prepared following the General Procedure **1.1** and purified by flash Chromatography (hexanes/ethyl acetate = 3:1,  $R_f$  = 0.21) to give white solid (68 mg, 91% yield). 36 hours. MP: 82 °C.

**<sup>1</sup>H NMR** (400 MHz, CDCl<sub>3</sub>) δ 9.82 (s, 1H), 8.84 – 8.71 (m, 2H), 8.17 (d,  $J$  = 8.2 Hz, 1H), 7.89 (d,  $J$  = 8.5 Hz, 2H), 7.58 – 7.35 (m, 5H), 3.03 (t,  $J$  = 6.6 Hz, 2H), 2.63 (t,  $J$  = 6.6 Hz, 2H), 1.97 – 1.84 (m, 4H).

**<sup>13</sup>C NMR** (101 MHz, CDCl<sub>3</sub>) δ 198.67, 171.34, 148.27, 139.41, 138.35, 136.45, 135.28, 134.52, 129.58, 129.01, 127.98, 127.56, 121.76, 121.57, 116.54, 38.29, 37.97, 25.24, 23.80.

**HRMS** (ESI): Calculated for C<sub>21</sub>H<sub>20</sub>N<sub>2</sub>O<sub>2</sub>Cl (M+H)<sup>+</sup>: 367.1208, found: 367.1215

**3i**

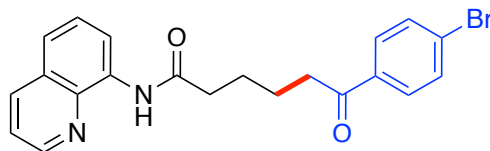

### 6-(4-bromophenyl)-6-oxo-N-(quinolin-8-yl)hexanamide

**3i** was prepared following the General Procedure **1.1** and purified by flash Chromatography (hexanes/ethyl acetate = 3:1,  $R_f$  = 0.26) to give white solid (75 mg, 92% yield). 36 hours. MP: 87 °C.

**<sup>1</sup>H NMR** (400 MHz, CDCl<sub>3</sub>) δ 9.81 (s, 1H), 8.92 – 8.63 (m, 2H), 8.16 (d,  $J$  = 7.8 Hz, 1H), 7.81 (d,  $J$  = 5.5 Hz, 2H), 7.62 – 7.39 (m, 4H), 3.02 (t,  $J$  = 5.2 Hz, 2H), 2.62 (t,  $J$  = 5.5 Hz, 2H), 1.97 – 1.81 (m, 4H).

**<sup>13</sup>C NMR** (101 MHz, CDCl<sub>3</sub>) δ 198.83, 171.32, 148.21, 138.32, 135.65, 134.49, 131.83, 129.64, 128.12, 127.96, 127.43, 121.70, 121.60, 116.49, 38.25, 37.94, 25.20, 23.75.

**HRMS** (ESI): Calculated for C<sub>21</sub>H<sub>20</sub>N<sub>2</sub>O<sub>2</sub>Br (M+H)<sup>+</sup>: 411.0703, found: 411.0706

3j

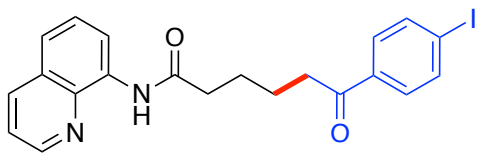

**6-(4-iodophenyl)-6-oxo-N-(quinolin-8-yl)hexanamide**

3j was prepared following the General Procedure 1.1 and purified by flash Chromatography (hexanes/ethyl acetate = 3:1,  $R_f$  = 0.21) to give white solid (48 mg, 52% yield). 36 hours. MP: 103 °C.

$^1\text{H NMR}$  (400 MHz,  $\text{CDCl}_3$ )  $\delta$  9.82 (s, 1H), 8.91 – 8.63 (m, 2H), 8.16 (dd,  $J$  = 8.3, 1.7 Hz, 1H), 7.88 – 7.74 (m, 2H), 7.73 – 7.60 (m, 2H), 7.58 – 7.42 (m, 3H), 3.01 (t,  $J$  = 6.7 Hz, 2H), 2.63 (t,  $J$  = 6.9 Hz, 2H), 1.96 – 1.82 (m, 4H).

$^{13}\text{C NMR}$  (101 MHz,  $\text{CDCl}_3$ )  $\delta$  199.26, 171.40, 148.25, 138.42, 137.98, 136.49, 136.26, 134.56, 129.57, 128.04, 127.52, 121.72, 121.56, 116.55, 101.00, 77.16, 38.28, 38.03, 25.28, 23.83.

HRMS (ESI): Calculated for  $\text{C}_{22}\text{H}_{23}\text{N}_2\text{O}_2$  ( $\text{M}+\text{H}$ ) $^+$ : 359.0564, found: 359.0569.

3k

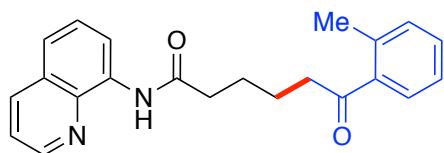

**6-oxo-N-(quinolin-8-yl)-6-(o-tolyl)hexanamide**

3k was prepared following the General Procedure 1.1 and purified by flash Chromatography (hexanes/ethyl acetate = 3:1,  $R_f$  = 0.27) to give white solid (62 mg, 89% yield). 36 hours. MP: 80 °C.

$^1\text{H NMR}$  (400 MHz,  $\text{CDCl}_3$ )  $\delta$  9.82 (s, 1H), 8.83 – 8.74 (m, 2H), 8.16 (d,  $J$  = 8.2 Hz, 1H), 7.62 (d,  $J$  = 7.6 Hz, 1H), 7.58 – 7.40 (m, 3H), 7.35 (t,  $J$  = 7.4 Hz, 1H), 7.24 (t,  $J$  = 8.7 Hz, 2H), 2.98 (t,  $J$  = 6.6 Hz, 2H), 2.62 (t,  $J$  = 6.8 Hz, 2H), 2.48 (s, 3H), 1.96 – 1.81 (m, 4H).

$^{13}\text{C NMR}$  (101 MHz,  $\text{CDCl}_3$ )  $\delta$  204.24, 171.44, 148.18, 138.40, 138.18, 137.97, 136.42, 134.57, 131.99, 131.21, 128.48, 128.36, 128.01, 127.49, 125.75, 121.62, 116.47, 41.35, 38.08, 25.33, 24.05, 21.40.



**HRMS** (ESI): Calculated for  $C_{22}H_{23}N_2O_2$  (M+H)<sup>+</sup>: 347.1754, found: 347.1759.

**3l**

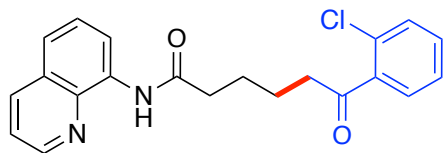

**6-(2-chlorophenyl)-6-oxo-N-(quinolin-8-yl)hexanamide**

**3l** was prepared following the General Procedure **1.1** and purified by flash Chromatography (hexanes/ethyl acetate = 3:1,  $R_f$  = 0.26) to give white solid (60 mg, 82% yield). 36 hours. MP: 99 °C.

**<sup>1</sup>H NMR** (400 MHz,  $CDCl_3$ )  $\delta$  9.82 (s, 1H), 8.85 – 8.72 (m, 2H), 8.16 (d,  $J$  = 8.3, 1H), 7.61 – 7.22 (m, 7H), 3.03 (t,  $J$  = 6.7 Hz, 2H), 2.62 (t,  $J$  = 6.8 Hz, 2H), 1.97 – 1.81 (m, 4H).  
**<sup>13</sup>C NMR** (101 MHz,  $CDCl_3$ )  $\delta$  203.20, 171.27, 148.13, 139.57, 138.30, 136.35, 134.48, 131.56, 130.73, 130.47, 128.70, 127.92, 127.33, 126.93, 121.57, 121.49, 116.38, 42.67, 37.90, 25.09, 23.73.

**HRMS** (ESI): Calculated for  $C_{21}H_{20}N_2O_2Cl$  (M+H)<sup>+</sup>: 367.1208, found: 367.1216

**3m**

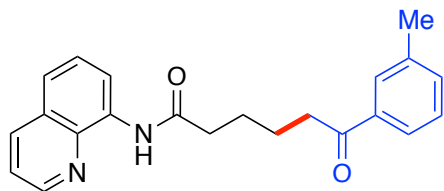

**6-oxo-N-(quinolin-8-yl)-6-(m-tolyl)hexanamide**

**3m** was prepared following the General Procedure **1.1** and purified by flash Chromatography (hexanes/ethyl acetate = 3:1,  $R_f$  = 0.27) to give white solid (65 mg, 94% yield). 36 hours. MP: 66 °C.

**<sup>1</sup>H NMR** (400 MHz,  $CDCl_3$ )  $\delta$  9.82 (s, 1H), 8.90 – 8.64 (m, 2H), 8.15 (d,  $J$  = 8.1 Hz, 1H), 7.75 (d,  $J$  = 8.5 Hz, 2H), 7.58 – 7.40 (m, 3H), 7.33 (d,  $J$  = 8.0 Hz, 2H), 3.05 (t,  $J$  = 7.6 Hz, 2H), 2.62 (t,  $J$  = 8.0 Hz, 2H), 2.40 (s, 2H), 1.99 – 1.83 (m, 4H).

$^{13}\text{C}$  NMR (101 MHz,  $\text{CDCl}_3$ )  $\delta$  204.24, 171.44, 148.18, 138.40, 138.18, 137.97, 136.42, 134.57, 131.99, 131.21, 128.48, 128.36, 128.01, 127.49, 125.75, 121.62, 116.47, 41.35, 38.08, 25.33, 24.05, 21.40.

HRMS (ESI): Calculated for  $\text{C}_{22}\text{H}_{23}\text{N}_2\text{O}_2$  ( $\text{M}+\text{H}$ ) $^+$ : 347.1754, found: 347.1763

**3n**

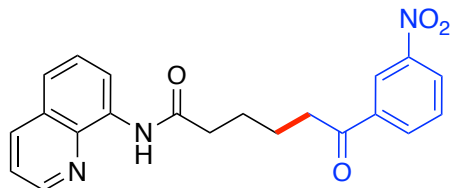

**6-(3-nitrophenyl)-6-oxo-N-(quinolin-8-yl)hexanamide**

**3n** was prepared following the General Procedure **1.1** and purified by flash Chromatography (hexanes/ethyl acetate = 3:1,  $R_f$  = 0.12) to give white solid (62 mg, 82% yield). 36 hours. MP: 165 °C.

$^1\text{H}$  NMR (400 MHz,  $\text{CDCl}_3$ )  $\delta$  9.83 (s, 1H), 8.88 – 8.69 (m, 3H), 8.40 (d,  $J$  = 8.3 Hz, 1H), 8.28 (d,  $J$  = 7.8 Hz, 1H), 8.17 (d,  $J$  = 7.5 Hz, 1H), 7.65 (t,  $J$  = 8.0 Hz, 1H), 7.58 – 7.42 (m, 3H), 3.14 (t,  $J$  = 6.8 Hz, 2H), 2.65 (t,  $J$  = 6.4 Hz, 2H), 2.02 – 1.86 (m, 4H), 1.56 (s, 3H).

$^{13}\text{C}$  NMR (101 MHz,  $\text{CDCl}_3$ )  $\delta$  197.64, 171.30, 148.56, 148.29, 138.41, 138.25, 136.51, 134.54, 133.69, 129.97, 128.06, 127.52, 127.37, 123.03, 121.75, 121.61, 116.55, 38.62, 37.95, 25.14, 23.58.

HRMS (ESI): Calculated for  $\text{C}_{21}\text{H}_{20}\text{N}_3\text{O}_4$  ( $\text{M}+\text{H}$ ) $^+$ : 378.1448, found: 378.1455

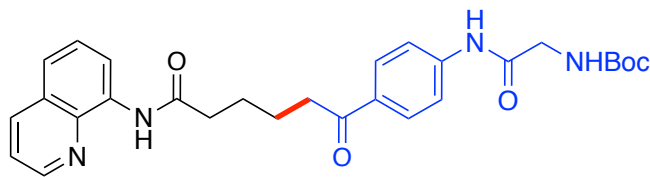

**3o**

**Tert-butyl (2-oxo-2-((4-(6-oxo-6-(quinolin-8-ylamino)hexanoyl)phenyl)amino)ethyl) carbamate**

**3o** was prepared following the General Procedure **1.1** and purified by flash Chromatography (hexanes/ethyl acetate = 1:1,  $R_f$  = 0.1) to give white solid (96 mg, 95% yield). 36 hours. MP: 140 °C.

**<sup>1</sup>H NMR** (400 MHz, CDCl<sub>3</sub>) δ 9.82 (s, 1H), 8.94 (s, 1H), 8.82 – 8.65 (m, 2H), 8.12 (d,  $J$  = 8.2 Hz, 1H), 7.87 (d,  $J$  = 8.3 Hz, 2H), 7.59 (d,  $J$  = 8.3 Hz, 2H), 7.53 – 7.37 (m, 3H), 5.59 (t,  $J$  = 5.8 Hz, 1H), 3.97 (d,  $J$  = 5.9 Hz, 2H), 2.96 (t,  $J$  = 6.6 Hz, 2H), 2.60 (t,  $J$  = 6.8 Hz, 2H), 1.97 – 1.76 (m, 3H), 1.45 (s, 9H).

**<sup>13</sup>C NMR** (101 MHz, CDCl<sub>3</sub>) δ 198.81, 171.63, 168.43, 156.72, 148.27, 142.06, 138.40, 136.44, 134.47, 132.75, 129.45, 128.01, 127.43, 121.71, 121.61, 119.19, 116.54, 80.83, 45.62, 38.08, 28.40, 25.37, 23.96.

**HRMS** (ESI): Calculated for C<sub>28</sub>H<sub>33</sub>N<sub>4</sub>O<sub>5</sub> (M+H)<sup>+</sup>: 505.2445, found: 505.2474

**4a**

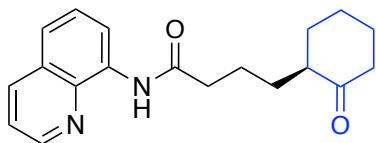

#### **6-cyclohexyl-6-oxo-N-(quinolin-8-yl)hexanamide**

**4a** was prepared following the General Procedure **1.1** and purified by flash Chromatography (hexanes/ethyl acetate = 3:1,  $R_f$  = 0.31) to give yellow gum (59 mg, 95% yield). 24 hours.

**<sup>1</sup>H NMR** (400 MHz, CDCl<sub>3</sub>) δ 9.80 (s, 1H), 8.81 (dd,  $J$  = 4.2, 1.7 Hz, 1H), 8.77 (d,  $J$  = 7.2 Hz, 1H), 8.16 (dd,  $J$  = 8.2, 1.7 Hz, 1H), 7.60 – 7.41 (m, 3H), 2.67 – 2.49 (m, 2H), 2.45 – 2.24 (m, 3H), 2.22 – 2.12 (m, 1H), 2.10 – 1.99 (m, 1H), 1.98 – 1.75 (m, 4H), 1.72 – 1.62 (m, 2H), 1.48 – 1.30 (m, 2H).

**<sup>13</sup>C NMR** (101 MHz, CDCl<sub>3</sub>) δ 213.25, 171.69, 148.27, 138.47, 136.49, 134.66, 128.07, 127.56, 121.72, 121.51, 116.56, 50.78, 42.23, 38.38, 34.09, 29.16, 28.20, 25.14, 23.43.

**HRMS** (ESI): Calculated for C<sub>19</sub>H<sub>23</sub>N<sub>2</sub>O<sub>3</sub> (M+H)<sup>+</sup>: 311.1754, found: 311.1754.

The enantiomeric excess was determined by chiral HPLC: 88% *ee*, (CHIRALPAK AS-H, hexane/*i*-PrOH = 80:20, flow rate 1 mL/min, T = 25 °C, 254 nm),  $t_R$  (major) = 19.317 min,

$t_R$  (minor) = 15.009 min. The absolute configuration was assigned tentatively based on analogy.

**4b**

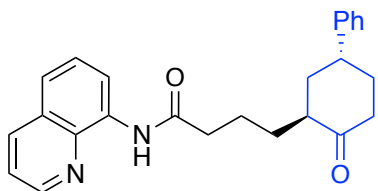

**4-(2-oxo-5-phenylcyclohexyl)-N-(quinolin-8-yl)butanamide**

**4b** was prepared following the General Procedure **1.2** and purified by flash Chromatography (hexanes/ethyl acetate = 3:1,  $R_f$  = 0.30) to give yellow gum (70 mg, 91% yield). 24 hours.

$^1\text{H NMR}$  (400 MHz,  $\text{CDCl}_3$ )  $\delta$  9.80 (s, 1H), 8.92 – 8.64 (m, 2H), 8.23 – 8.09 (m, 1H), 7.65 – 7.38 (m, 3H), 7.35 – 7.11 (m, 5H), 3.25 – 3.05 (m, 1H), 2.69 – 2.48 (m, 4H), 2.46 – 2.31 (m, 1H), 2.28 – 2.12 (m, 2H), 2.11 – 1.61 (m, 6H).

$^{13}\text{C NMR}$  (101 MHz,  $\text{CDCl}_3$ )  $\delta$  214.04, 171.16, 148.22, 144.44, 138.36, 136.43, 128.66, 127.45, 126.82, 126.74, 121.68, 121.52, 116.49, 49.28, 43.50, 41.91, 41.38, 38.44, 38.30, 33.42, 28.74, 23.28.

**HRMS** (ESI): Calculated for  $\text{C}_{25}\text{H}_{27}\text{N}_2\text{O}_2$  ( $\text{M}+\text{H}$ ) $^+$ : 387.2067, found: 387.2086.

The enantiomeric excess was determined by chiral HPLC: **Major**: 93% *ee*, **Minor**: 73% *ee* (CHIRALPAK AS-H, hexane/*i*-PrOH = 85/15, flow rate 1 mL/min,  $T = 25^\circ\text{C}$ , 254 nm), **Minor**:  $t_R$  (major) = 19.853 min,  $t_R$  (minor) = 34.417 min; **Major**:  $t_R$  (major) = 40.780 min,  $t_R$  (minor) = 60.310 min; **dr**: 3.5/1. The absolute configuration was determined based on the comparison of the literature.<sup>3</sup>

**4c**

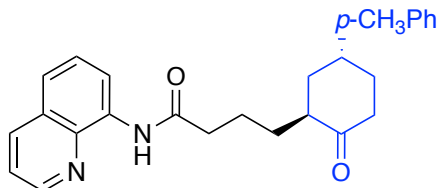

**4-(2-oxo-5-(p-tolyl)cyclohexyl)-N-(quinolin-8-yl)butanamide**

**4c** was prepared following the General Procedure **1.2** and purified by flash Chromatography (hexanes/ethyl acetate = 3:1,  $R_f$  = 0.30) to give yellow gum (77 mg, 96% yield). 24 hours.

$^1\text{H NMR}$  (400 MHz,  $\text{CDCl}_3$ )  $\delta$  9.80 (s, 1H), 8.92 – 8.64 (m, 2H), 8.23 – 8.09 (m, 1H), 7.65 – 7.38 (m, 3H), 7.35 – 7.11 (m, 5H), 3.25 – 3.05 (m, 1H), 2.69 – 2.48 (m, 4H), 2.46 – 2.31 (m, 1H), 2.28 – 2.12 (m, 2H), 2.11 – 1.61 (m, 6H).

$^{13}\text{C NMR}$  (101 MHz,  $\text{CDCl}_3$ )  $\delta$  213.93, 171.04, 148.10, 141.27, 138.22, 136.30, 135.88, 134.41, 129.22, 127.87, 127.31, 126.57, 121.57, 121.41, 116.37, 49.15, 38.44, 38.34, 37.48, 36.83, 33.38, 30.65, 23.18, 20.95.

**HRMS** (ESI): Calculated for  $\text{C}_{26}\text{H}_{29}\text{N}_2\text{O}_2$  ( $\text{M}+\text{H}$ ) $^+$ : 401.2224, found: 401.2247.

The enantiomeric excess was determined by chiral HPLC: **Major**: 93% *ee*, **Minor**: 70% *ee* (CHIRALPAK OJ-H, hexane/*i*-PrOH = 70:30, flow rate 1 mL/min,  $T = 25\text{ }^\circ\text{C}$ , 254 nm), **Major**:  $t_R$  (major) = 25.653 min,  $t_R$  (minor) = 41.974 min; **Minor**:  $t_R$  (major) = 33.155 min,  $t_R$  (minor) = 57.709 min; **dr**: 8.2/1. The absolute configuration was determined based on the comparison of the literature.<sup>3</sup>

**4d**

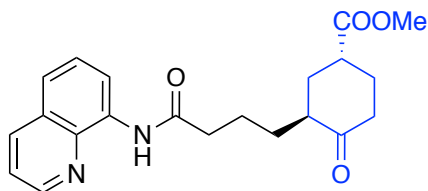

**Methyl 4-oxo-3-(4-oxo-4-(quinolin-8-ylamino)butyl)cyclohexane-1-carboxylate**

**4d** was prepared following the General Procedure **1.2** and purified by flash Chromatography (hexanes/ethyl acetate = 2:1,  $R_f$  = 0.17) to give yellow gum (70 mg, 95% yield). 24 hours.

$^1\text{H NMR}$  (400 MHz,  $\text{CDCl}_3$ )  $\delta$  9.80 (s, 1H), 8.86 – 8.72 (m, 2H), 8.16 (dd,  $J = 8.2, 1.7$  Hz, 1H), 7.59 – 7.41 (m, 3H), 3.75 (s, 3H), 2.94 – 2.80 (m, 1H), 2.66 – 2.26 (m, 7H), 2.04 – 1.95 (m, 1H), 1.93 – 1.71 (m, 4H), 1.50 – 1.37 (m, 1H).

$^{13}\text{C NMR}$  (101 MHz,  $\text{CDCl}_3$ )  $\delta$  212.21, 174.80, 171.45, 148.27, 138.46, 136.50, 134.62, 128.07, 127.54, 121.73, 121.55, 116.57, 52.18, 47.49, 38.69, 38.36, 38.07, 34.28, 29.30, 28.76, 23.19.

**HRMS** (ESI): Calculated for  $C_{21}H_{25}N_2O_4$  (M+H)<sup>+</sup>: 369.1809, found: 369.1829.

The enantiomeric excess was determined by chiral HPLC: **Major**: 96% *ee*, **Minor**: 43% *ee* (CHIRALPAK AS-H, hexane/*i*-PrOH = 82/18, flow rate 1 mL/min, T = 25 °C, 254 nm), **Minor**:  $t_R$  (major) = 45.983 min,  $t_R$  (minor) = 105.002 min; **Major**:  $t_R$  (major) = 66.030 min,  $t_R$  (minor) = 59.002 min; **dr**: 2.6/1. The absolute configuration was determined based on the comparison of the literature.<sup>3</sup>

**4e**

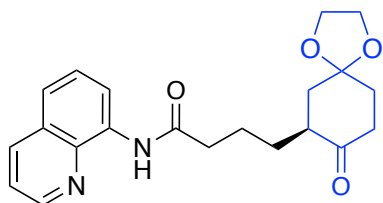

**4-(8-oxo-1,4-dioxaspiro[4.5]decan-7-yl)-N-(quinolin-8-yl)butanamide**

**4e** was prepared following the General Procedure **1.2** and purified by flash Chromatography (hexanes/ethyl acetate = 3:1,  $R_f$  = 0.17) to give yellow gum (65 mg, 88% yield). 24 hours.

**<sup>1</sup>H NMR** (400 MHz, CDCl<sub>3</sub>)  $\delta$  9.80 (s, 1H), 8.88 – 8.69 (m, 2H), 8.16 (dd,  $J$  = 8.3, 1.6 Hz, 1H), 7.58 – 7.42 (m, 3H), 4.12 – 3.90 (m, 4H), 2.76 – 2.48 (m, 4H), 2.43 – 2.32 (m, 1H), 2.22 – 2.12 (m, 1H), 2.09 – 1.87 (m, 3H), 1.87 – 1.69 (m, 3H), 1.41 – 1.30 (m, 1H).

**<sup>13</sup>C NMR** (101 MHz, CDCl<sub>3</sub>)  $\delta$  211.41, 171.51, 148.21, 138.39, 136.42, 134.58, 128.00, 127.47, 121.67, 121.47, 116.49, 107.46, 64.84, 64.68, 46.32, 40.60, 38.36, 38.21, 34.85, 28.62, 23.12.

**HRMS** (ESI): Calculated for  $C_{21}H_{25}N_2O_4$  (M+H)<sup>+</sup>: 369.1809, found: 369.1826.

The enantiomeric excess was determined by chiral HPLC: 87% *ee*, (CHIRALPAK OJ-H, hexane/*i*-PrOH = 90:10, flow rate 1 mL/min, T = 25 °C, 254 nm),  $t_R$  (major) = 104.713 min,  $t_R$  (minor) = 117.955 min. The absolute configuration was assigned tentatively based on analogy.

**4f**

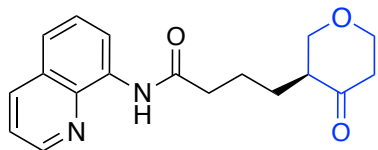

#### 4-(4-oxotetrahydro-2H-pyran-3-yl)-N-(quinolin-8-yl)butanamide

**4f** was prepared following the General Procedure **1.2** and purified by flash Chromatography (hexanes/ethyl acetate = 1:1,  $R_f$  = 0.26) to give yellow solid (56 mg, 90% yield). 24 hours. MP: 108 °C.

**<sup>1</sup>H NMR** (400 MHz, CDCl<sub>3</sub>) δ 9.80 (s, 1H), 8.85 – 8.68 (m, 2H), 8.15 (d,  $J$  = 8.2 Hz, 1H), 7.58 – 7.37 (m, 3H), 4.26 – 4.09 (m, 2H), 3.75 (td,  $J$  = 10.8, 3.7 Hz, 1H), 3.46 (t,  $J$  = 10.4 Hz, 1H), 2.68 – 2.50 (m, 4H), 2.43 – 2.37 (m, 1H), 1.99 – 1.75 (m, 3H), 1.43 – 1.30 (m, 1H).

**<sup>13</sup>C NMR** (101 MHz, CDCl<sub>3</sub>) δ 208.24, 171.17, 148.18, 138.38, 136.47, 136.43, 134.51, 128.01, 127.46, 121.63, 116.48, 72.75, 68.75, 51.58, 42.55, 38.01, 25.41, 23.19.

**HRMS** (ESI): Calculated for C<sub>18</sub>H<sub>21</sub>N<sub>2</sub>O<sub>3</sub> (M+H)<sup>+</sup>: 313.1547, found: 313.1565.

The enantiomeric excess was determined by chiral HPLC: 88% *ee*, (CHIRALPAK OJ-H, hexane/*i*-PrOH = 70:30, flow rate 1 mL/min, T = 25 °C, 254 nm),  $t_R$  (major) = 35.458 min,  $t_R$  (minor) = 43.327 min. The absolute configuration was assigned tentatively based on analogy.

#### 4g

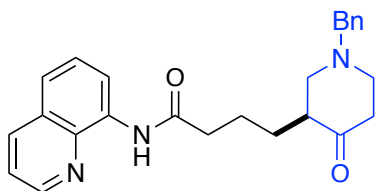

#### 4-(1-benzyl-4-oxopiperidin-3-yl)-N-(quinolin-8-yl)butanamide

**4g** was prepared following the General Procedure **1.2** and purified by flash Chromatography (hexanes/ethyl acetate = 2:1,  $R_f$  = 0.17) to give yellow gum (58 mg, 72% yield). 24 hours.

**<sup>1</sup>H NMR** (400 MHz, CDCl<sub>3</sub>) δ 9.78 (s, 1H), 8.84 – 8.68 (m, 2H), 8.13 (d,  $J$  = 8.1 Hz, 1H), 7.56 – 7.39 (m, 3H), 7.38 – 7.20 (m, 5H), 3.64 (d,  $J$  = 13.2 Hz, 1H), 3.54 (d,  $J$  = 13.2 Hz,

1H), 3.14 – 3.04 (m, 1H), 3.02 – 2.92 (m, 1H), 2.65 – 2.49 (m, 4H), 2.48 – 2.32 (m, 2H), 2.25 (t,  $J = 10.6$  Hz, 1H), 1.99 – 1.84 (m, 1H), 1.84 – 1.71 (m, 2H), 1.44 – 1.31 (m, 1H).

$^{13}\text{C}$  NMR (101 MHz,  $\text{CDCl}_3$ )  $\delta$  210.72, 171.43, 148.24, 138.42, 138.20, 136.47, 136.43, 134.59, 128.96, 128.50, 128.03, 127.45, 121.75, 121.63, 121.50, 116.53, 61.96, 59.03, 58.95, 53.61, 49.79, 41.11, 38.20, 27.11, 23.34.

HRMS (ESI): Calculated for  $\text{C}_{25}\text{H}_{28}\text{N}_3\text{O}_2$  ( $\text{M}+\text{H}$ ) $^+$ : 402.2176, found: 402.2196.

The enantiomeric excess was determined by chiral HPLC: 0% *ee*, (CHIRALPAK OJ-H, hexane/*i*-PrOH = 75:25, flow rate 1 mL/min,  $T = 25$  °C, 254 nm),  $t_{\text{R}} = 33.561$  min,  $t_{\text{R}} = 51.758$  min.

#### 4h

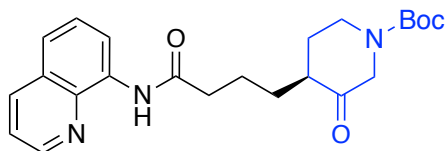

#### Tert-butyl 3-oxo-4-(4-oxo-4-(quinolin-8-ylamino)butyl)piperidine-1-carboxylate

**4h** was prepared following the General Procedure **1.2** and purified by flash Chromatography (hexanes/ethyl acetate = 2:1,  $R_f = 0.15$ ) to give yellow gum (66 mg, 80% yield). 24 hours.

$^1\text{H}$  NMR (400 MHz,  $\text{CDCl}_3$ )  $\delta$  9.80 (s, 1H), 8.85 – 8.70 (m, 2H), 8.16 (d,  $J = 8.2$  Hz, 1H), 7.58 – 7.41 (m, 3H), 4.80 – 4.39 (m, 1H), 4.27 – 3.86 (m, 1H), 3.27 – 3.02 (s, 1H), 2.76 – 2.55 (m, 2H), 2.53 – 2.37 (m, 2H), 2.06 – 1.73 (m, 7H), 1.47 (s, 9H).

$^{13}\text{C}$  NMR (101 MHz,  $\text{CDCl}_3$ )  $\delta$  208.64, 148.39, 148.11, 138.41, 136.44, 134.53, 128.03, 127.66, 127.30, 121.88, 121.54, 116.66, 116.41, 80.61, 37.31, 36.96, 30.42, 28.57, 28.39, 23.37, 23.29, 21.82.

HRMS (ESI): Calculated for  $\text{C}_{23}\text{H}_{30}\text{N}_3\text{O}_4$  ( $\text{M}+\text{H}$ ) $^+$ : 412.2231, found: 412.2252.

The enantiomeric excess was determined by chiral HPLC: 47% *ee*, (CHIRALPAK OD-H, hexane/*i*-PrOH = 85:15, flow rate 1 mL/min,  $T = 25$  °C, 254 nm),  $t_{\text{R}}$  (minor) = 30.184 min,  $t_{\text{R}}$  (major) = 34.668 min. The absolute configuration was assigned tentatively based on analogy.



4i

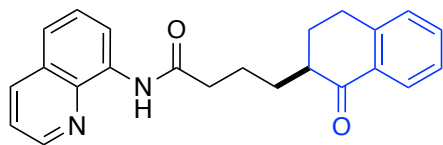

**Tert-butyl 3-oxo-4-(4-oxo-4-(quinolin-8-ylamino)butyl)piperidine-1-carboxylate**

4i was prepared following the General Procedure 1.2 and purified by flash Chromatography (hexanes/ethyl acetate = 3:1,  $R_f$  = 0.27) to give white solid (68 mg, 95% yield). 24 hours. MP: 103 °C.

$^1\text{H NMR}$  (400 MHz,  $\text{CDCl}_3$ )  $\delta$  9.83 (s, 1H), 8.87 – 8.71 (m, 2H), 8.15 (d,  $J$  = 8.2 Hz, 1H), 8.02 (d,  $J$  = 7.8 Hz, 1H), 7.58 – 7.40 (m, 4H), 7.26 (dt,  $J$  = 21.0, 7.6 Hz, 2H), 3.07 – 2.93 (m, 5H), 2.72 – 2.48 (m, 3H), 2.36 – 2.25 (m, 1H), 2.15 - 2.05 (m, 1H), 2.03 - 1.84(m, 3H), 1.73 – 1.61 (m, 1H).

$^{13}\text{C NMR}$  (101 MHz,  $\text{CDCl}_3$ )  $\delta$  200.15, 171.61, 148.27, 144.10, 138.47, 136.47, 134.65, 133.29, 132.62, 128.81, 128.06, 127.56, 126.69, 121.69, 121.52, 116.56, 47.58, 38.35, 29.26, 28.64, 28.44, 23.28.

**HRMS** (ESI): Calculated for  $\text{C}_{23}\text{H}_{23}\text{N}_3\text{O}_2$  ( $\text{M}+\text{H}$ ) $^+$ : 359.1754, found: 359.1767.

The enantiomeric excess was determined by chiral HPLC: 0% *ee*, (CHIRALPAK OD-H, hexane/*i*-PrOH = 80:20, flow rate 1 mL/min,  $T$  = 25 °C, 254 nm),  $t_R$  = 50.978 min,  $t_R$  = 70.594 min

4j

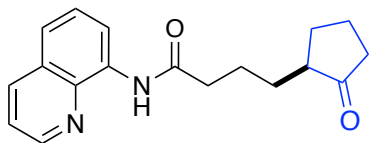

**Tert-butyl 3-oxo-4-(4-oxo-4-(quinolin-8-ylamino)butyl)piperidine-1-carboxylate**

4j was prepared following the General Procedure 1.2 and purified by flash Chromatography (hexanes/ethyl acetate = 3:1,  $R_f$  = 0.31) to give yellow gum (55 mg, 92% yield). 24 hours.

$^1\text{H NMR}$  (400 MHz,  $\text{CDCl}_3$ )  $\delta$  9.80 (s, 1H), 8.85 – 8.72 (m, 2H), 8.16 (d,  $J$  = 8.3 Hz, 1H), 7.57 – 7.42 (m, 3H), 2.66 – 2.50 (m, 2H), 2.37 – 2.22 (m, 2H), 2.18 – 1.96 (m, 3H), 1.95 – 1.71 (m, 4H), 1.61 – 1.52 (m, 1H), 1.49 – 1.35 (m, 1H).

$^{13}\text{C}$  NMR (101 MHz,  $\text{CDCl}_3$ )  $\delta$  221.17, 171.43, 148.23, 138.41, 136.46, 134.57, 128.03, 127.49, 121.69, 121.52, 116.52, 49.15, 38.22, 38.17, 29.65, 29.43, 23.75, 20.85.

**HRMS** (ESI): Calculated for  $\text{C}_{18}\text{H}_{21}\text{N}_2\text{O}_2$  ( $\text{M}+\text{H}$ ) $^+$ : 297.1598, found: 297.1597.

The enantiomeric excess was determined by chiral HPLC: 0% *ee*, (CHIRALPAK OD-H, hexane/*i*-PrOH = 80:20, flow rate 1 mL/min, T = 25 °C, 254 nm),  $t_{\text{R}}$  = 16.946 min,  $t_{\text{R}}$  = 23.041 min

**4k**

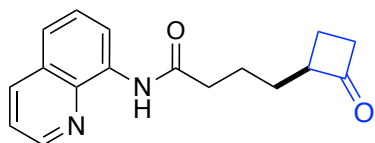

#### 4-(2-oxocyclobutyl)-N-(quinolin-8-yl)butanamide

**4k** was prepared following the General Procedure **1.2** and purified by flash Chromatography (hexanes/ethyl acetate = 3:1,  $R_f$  = 0.31) to give yellow gum (54 mg, 95% yield). 24 hours.

$^1\text{H}$  NMR (400 MHz,  $\text{CDCl}_3$ )  $\delta$  9.81 (s, 1H), 8.86 – 8.71 (m, 2H), 8.16 (d,  $J$  = 8.2 Hz, 1H), 7.59 – 7.40 (m, 3H), 3.43 – 3.29 (m, 1H), 3.12-2.99 (m, 1H), 2.96 – 2.84 (m, 1H), 2.66 – 2.50 (m, 2H), 2.30 – 2.15 (m, 1H), 1.97 - 1.77 (m, 3H), 1.76 – 1.64 (m, 2H).

$^{13}\text{C}$  NMR (101 MHz,  $\text{CDCl}_3$ )  $\delta$  211.82, 171.31, 148.24, 138.45, 136.50, 134.57, 128.07, 127.52, 121.79, 121.68, 116.54, 60.42, 60.36, 44.67, 37.87, 29.19, 23.26, 17.02.

**HRMS** (ESI): Calculated for  $\text{C}_{17}\text{H}_{19}\text{N}_2\text{O}_2$  ( $\text{M}+\text{H}$ ) $^+$ : 283.1441, found: 283.1447.

The enantiomeric excess was determined by chiral HPLC: 0% *ee*, (CHIRALPAK AS-H, hexane/*i*-PrOH = 80/20, flow rate 1 mL/min, T = 25 °C, 254 nm),  $t_{\text{R}}$  (major) = 18.859 min,  $t_{\text{R}}$  (minor) = 25.859 min.

**4l**

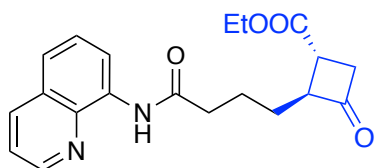

#### Ethyl 3-oxo-2-(4-oxo-4-(quinolin-8-ylamino)butyl)cyclobutane-1-carboxylate

**4I** was prepared following the General Procedure **1.2** and purified by flash Chromatography (hexanes/ethyl acetate = 2:1,  $R_f$  = 0.16) to give yellow gum (51 mg, 72% yield). 24 hours.

**<sup>1</sup>H NMR** (400 MHz, CDCl<sub>3</sub>)  $\delta$  9.78 (s, 1H), 8.83 – 8.68 (m, 2H), 8.15 (d,  $J$  = 8.2 Hz, 1H), 7.56 – 7.39 (m, 3H), 4.20 (q,  $J$  = 7.1 Hz, 2H), 3.65 – 3.56 (m, 1H), 3.38 (ddd,  $J$  = 17.4, 7.8, 3.1 Hz, 1H), 3.10 (ddd,  $J$  = 17.4, 8.8, 2.4 Hz, 1H), 2.90 (q,  $J$  = 8.0 Hz, 1H), 2.65 – 2.48 (m, 2H), 1.97 – 1.81 (m, 3H), 1.78 – 1.65 (m, 1H), 1.27 (t,  $J$  = 7.1 Hz, 3H).

**<sup>13</sup>C NMR** (101 MHz, CDCl<sub>3</sub>)  $\delta$  206.18, 173.77, 170.92, 148.18, 138.30, 136.39, 134.45, 127.95, 127.36, 121.66, 121.50, 116.39, 64.99, 61.36, 53.55, 48.32, 37.46, 34.34, 28.21, 22.73, 14.20.

**HRMS** (ESI): Calculated for C<sub>20</sub>H<sub>23</sub>N<sub>2</sub>O<sub>4</sub> (M+H)<sup>+</sup>: 355.1652, found: 355.1674.

The enantiomeric excess was determined by chiral HPLC: 45% *ee*, (CHIRALPAK OD-H, hexane/*i*-PrOH = 85:15, flow rate 1 mL/min, T = 25 °C, 254 nm),  $t_R$  (minor) = 40.124 min,  $t_R$  (major) = 44.126 min. The absolute configuration was assigned tentatively based on analogy.

### 5a-B

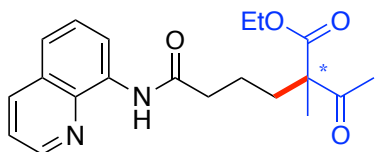

### Ethyl 2-acetyl-2-methyl-6-oxo-6-(quinolin-8-ylamino)hexanoate

### 5a-L

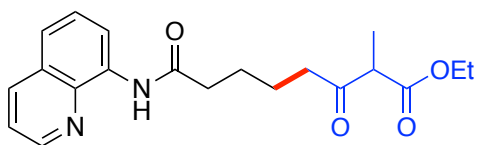

### Ethyl 2-methyl-3,8-dioxo-8-(quinolin-8-ylamino)octanoate

**5a-B** and **5a-L** were prepared following the General Procedure **1.3** and purified by flash Chromatography as an inseparable mixture with 47:53 ratio. Hexanes/ethyl acetate = 3:1,  $R_f$  = 0.33. Yellow gum (68 mg, 95% yield). 36 hours.

**<sup>1</sup>H NMR** (400 MHz, CDCl<sub>3</sub>)  $\delta$  9.80 (s, 1H), 8.87 – 8.71 (m, 2H), 8.17 (d,  $J$  = 8.2 Hz, 1H), 7.59 – 7.40 (m, 3H), 4.26 – 4.11 (m, 2H), 3.57 – 3.47 (m, 0.5H), 2.74 – 2.52 (m, 3H), 2.18

(s, 1H), 2.07 – 1.65 (m, 4H), 1.57 (s, 1H), 1.40 (s, 1H), 1.34 (d,  $J = 7.2$  Hz, 2H), 1.26 (t,  $J = 7.2$  Hz, 3H).

$^{13}\text{C}$  NMR (101 MHz,  $\text{CDCl}_3$ )  $\delta$  205.67, 172.92, 171.36, 170.96, 170.67, 148.24, 138.41, 136.48, 134.56, 128.04, 127.50, 121.72, 121.55, 116.52, 61.47, 59.68, 52.98, 41.20, 38.09, 37.95, 34.37, 26.27, 25.06, 23.22, 20.45, 18.92, 14.21, 12.90.

HRMS (ESI): Calculated for  $\text{C}_{20}\text{H}_{24}\text{N}_2\text{O}_4$  ( $\text{M}+\text{H}$ ) $^+$ : 357.1809, found: 357.1831.

The enantiomeric excess was determined by chiral HPLC: **5a-B**: 63% *ee*, (CHIRALPAK OD-H, hexane/*i*-PrOH = 90:10, flow rate 1 mL/min,  $T = 25$  °C, 254 nm),  $t_R$  (major) = 38.724 min,  $t_R$  (minor) = 44.544 min. **5a-L**:  $t_R = 54.610$  min. **5a-B:5a-L** = 47:53.

### 5b-B

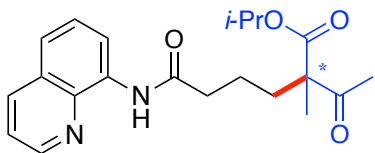

### Isopropyl 2-acetyl-2-methyl-6-oxo-6-(quinolin-8-ylamino)hexanoate

### 5b-L

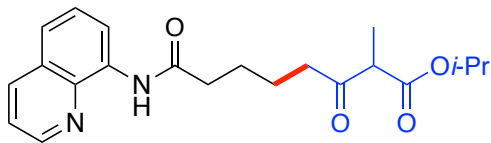

### Isopropyl 2-methyl-3,8-dioxo-8-(quinolin-8-ylamino)octanoate

**5b-B** and **5b-L** were prepared following the General Procedure 1.3 and purified by flash Chromatography as an inseparable mixture with 52:48 ratio. Hexanes/ethyl acetate = 3:1,  $R_f = 0.28$ . Yellow gum (70 mg, 95% yield). 36 hours.

$^1\text{H}$  NMR (400 MHz,  $\text{CDCl}_3$ )  $\delta$  9.78 (s, 1H), 8.86 – 8.71 (m, 2H), 8.16 (dd,  $J = 8.3, 1.6$  Hz, 1H), 7.59 – 7.39 (m, 3H), 5.13 – 4.97 (dp,  $J = 12.4, 6.3$  Hz, 2H), 3.48 (q,  $J = 7.1$  Hz, 0.5H), 2.73 – 2.49 (m, 3H), 2.17 (s, 1.5H), 2.06 – 1.58 (m, 5H), 1.38 (s, 1.5H), 1.32 (d,  $J = 7.1$  Hz, 1.5H), 1.24 (t,  $J = 5.4, 2.6$  Hz, 6H).

$^{13}\text{C}$  NMR (101 MHz,  $\text{CDCl}_3$ )  $\delta$  205.45, 205.35, 172.12, 171.10, 170.71, 169.96, 148.01, 138.11, 136.22, 134.33, 134.30, 127.78, 127.18, 121.50, 121.34, 116.24, 68.75, 59.45, 52.91, 40.95, 37.83, 37.68, 34.07, 26.00, 24.85, 23.01, 21.56, 21.45, 20.17, 18.63, 12.61.

**HRMS** (ESI): Calculated for  $C_{21}H_{27}N_2O_4$  ( $M+H$ )<sup>+</sup>: 371.1965, found: 357.1987.

The enantiomeric excess was determined by chiral HPLC: **5b-B**: 74% *ee*, (CHIRALPAK OD-H, hexane/*i*-PrOH = 92:08, flow rate 1 mL/min, T = 25 °C, 254 nm),  $t_R$  (major) = 30.231 min,  $t_R$  (minor) = 36.600 min. **5b-L**:  $t_R$  = 41.909 min. **5b-B:5b-L** = 52:48.

### **5c-B**

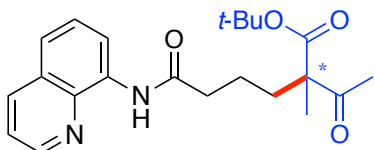

### **Tert-butyl 2-acetyl-2-methyl-6-oxo-6-(quinolin-8-ylamino)hexanoate**

### **5c-L**

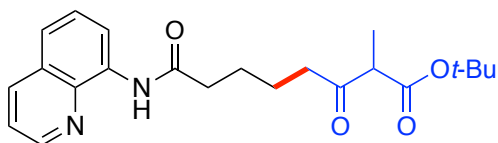

### **Tert-butyl 2-methyl-3,8-dioxo-8-(quinolin-8-ylamino)octanoate**

**5c-B** and **5c-L** were prepared following the General Procedure 1.3 and purified by flash Chromatography as an inseparable mixture with 51:49 ratio. Hexanes/ethyl acetate = 3:1,  $R_f$  = 0.26. Yellow gum (73 mg, 95% yield). 36 hours.

**<sup>1</sup>H NMR** (400 MHz,  $CDCl_3$ )  $\delta$  9.79 (s, 1H), 8.85 – 8.71 (m, 2H), 8.16 (d,  $J$  = 8.2 Hz, 1H), 7.59 – 7.40 (m, 3H), 3.43 (q,  $J$  = 7.1 Hz, 0.5H), 2.73 – 2.50 (m, 3H), 2.17 (s, 1.6H), 2.02 – 1.67 (m, 4H), 1.46 (s, 4.5H), 1.45 (s, 4.5H), 1.35 (s, 1.5H), 1.29 (d,  $J$  = 7.1 Hz, 1.5H).

**<sup>13</sup>C NMR** (101 MHz,  $CDCl_3$ )  $\delta$  215.60, 171.15, 148.12, 138.27, 136.33, 134.43, 127.90, 127.35, 121.58, 121.40, 116.38, 48.88, 41.29, 38.43, 37.57, 32.37, 31.48, 30.79, 27.41, 26.80, 23.22.

**HRMS** (ESI): Calculated for  $C_{22}H_{28}NaN_2O_4$  ( $M+Na$ )<sup>+</sup>: 407.1941, found: 407.1941.

The enantiomeric excess was determined by chiral HPLC: **5c-B**: 74% *ee*, (CHIRALPAK OJ-H, hexane/*i*-PrOH = 95:05, flow rate 1 mL/min, T = 25 °C, 254 nm),  $t_R$  (major) = 31.039 min,  $t_R$  (minor) = 41.822 min. **5c-L**:  $t_R$  = 54.620 min,  $t_R$  = 66.851 min. **5c-B:5c-L** = 51:49

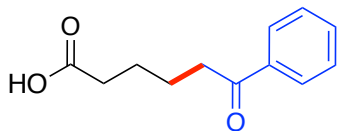

### 6-oxo-6-phenylhexanoic acid

**6** were prepared following the General Procedure **1.4** and purified by flash Chromatography. White solid (177 mg, 86% yield). MP: 70 °C.<sup>5</sup>

**<sup>1</sup>H NMR** (400 MHz, CDCl<sub>3</sub>) δ 7.96 (d, *J* = 7.3 Hz, 1H), 7.56 (t, *J* = 7.4 Hz, 1H), 7.46 (t, *J* = 7.5 Hz, 1H), 3.01 (t, *J* = 7.0 Hz, 1H), 2.43 (t, *J* = 7.1 Hz, 1H), 1.87 – 1.68 (m, 2H).

**<sup>13</sup>C NMR** (101 MHz, CDCl<sub>3</sub>) δ 200.00, 179.67, 136.91, 133.11, 128.65, 128.22, 128.08, 38.12, 33.95, 24.34, 23.59.

**HRMS** (ESI): Calculated for C<sub>25</sub>H<sub>28</sub>N<sub>3</sub>O<sub>2</sub> (M+H)<sup>+</sup>: 207.1016, found: 207.1017.

### Reference:

1. Y. Feng and G. Chen, *Angew. Chem., Int. Ed.*, 2010, **49**, 958-961.
2. J. A. Gurak, K. S. Yang, Z. Liu and K. M. Engle, *J. Am. Chem. Soc.*, 2016, **138**, 5805-5808.
3. H. Shen, L. Zhang, S. Chen, J. Feng, B. Zhang, Y. Zhang, X. Zhang, Y. Wu and L. Gong, *ACS Catal.*, 2019, **9**, 791-797.
4. (a) H. Wang, Z. Bai, T. Jiao, Z. Deng, H. Tong, G. He, Q. Peng and G. Chen, *J. Am. Chem. Soc.*, 2018, **140**, 3542–3546; (b) Z. Liu, X. Li, T. Zeng and K. M. Engle, *ACS Catal.*, 2019, **9**, 3260-3265.
5. Reported MP: 66-68°C. Y.-S. Hon, S.-W. Lin, L. Lu and Y.-J. Chen, *Tetrahedron*, 1995, **51**, 5019.

## IV. NMR Spectra

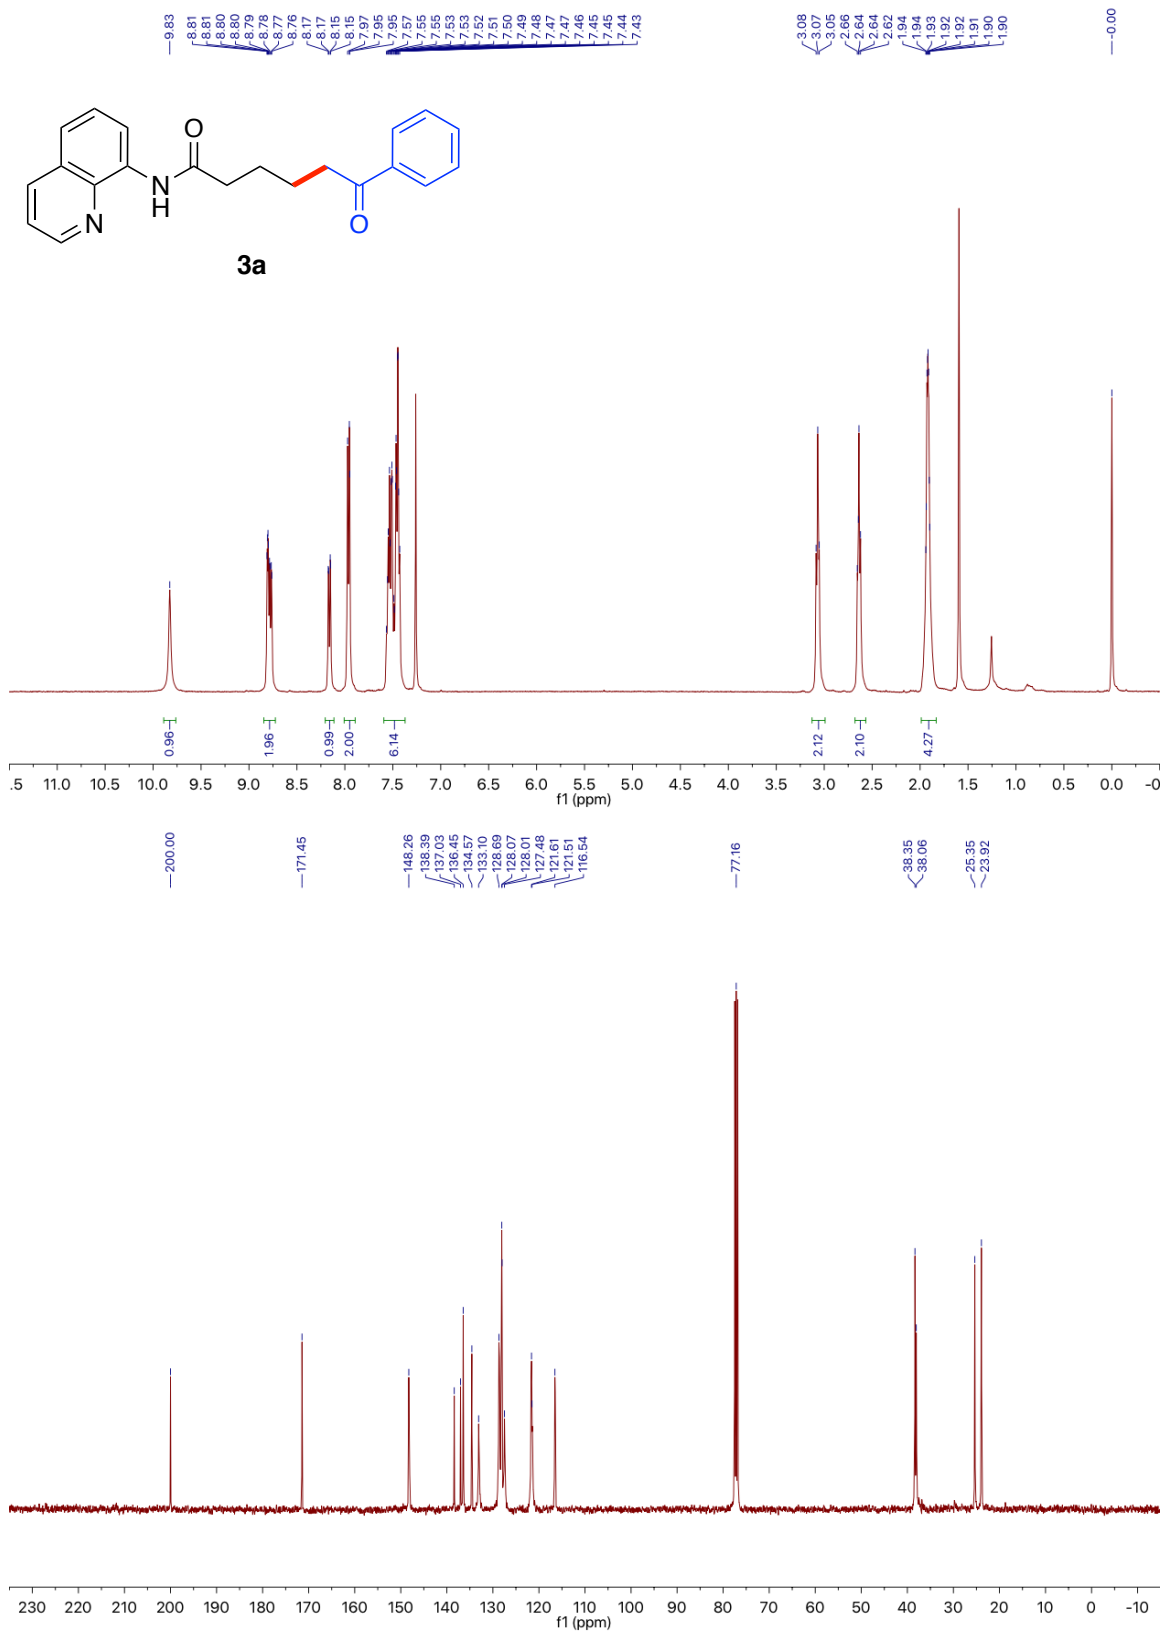

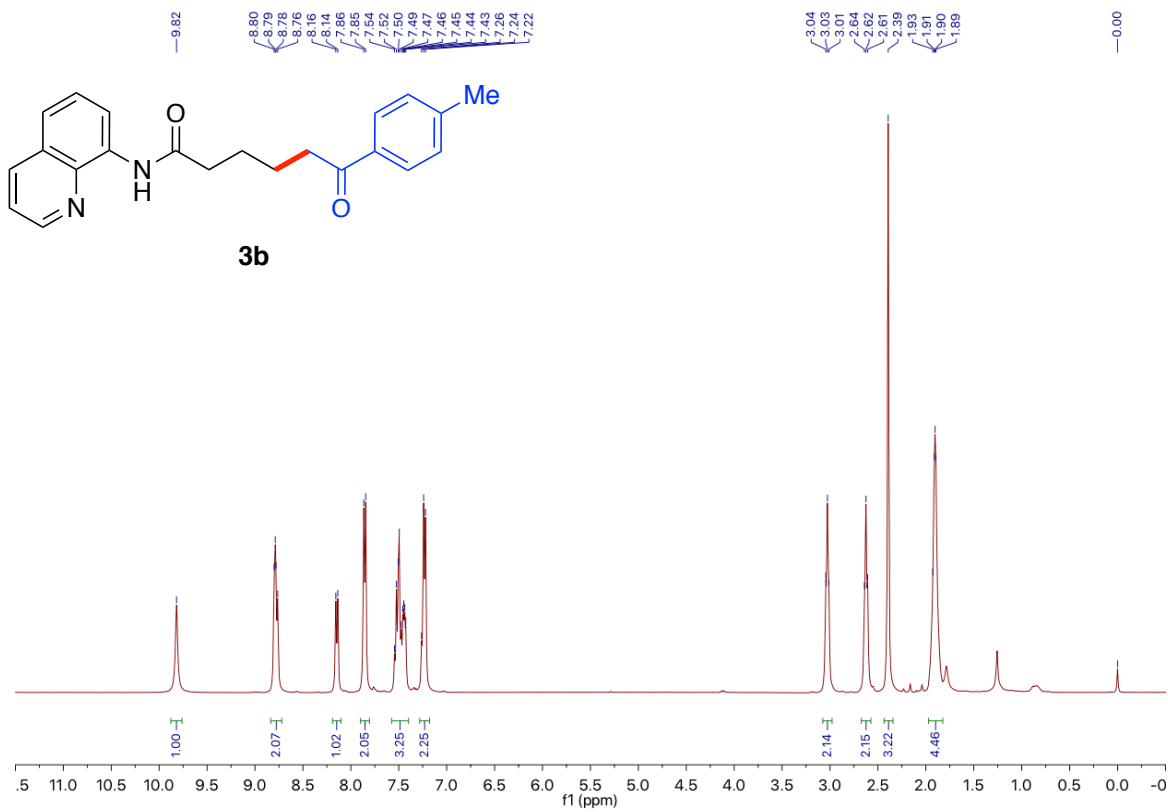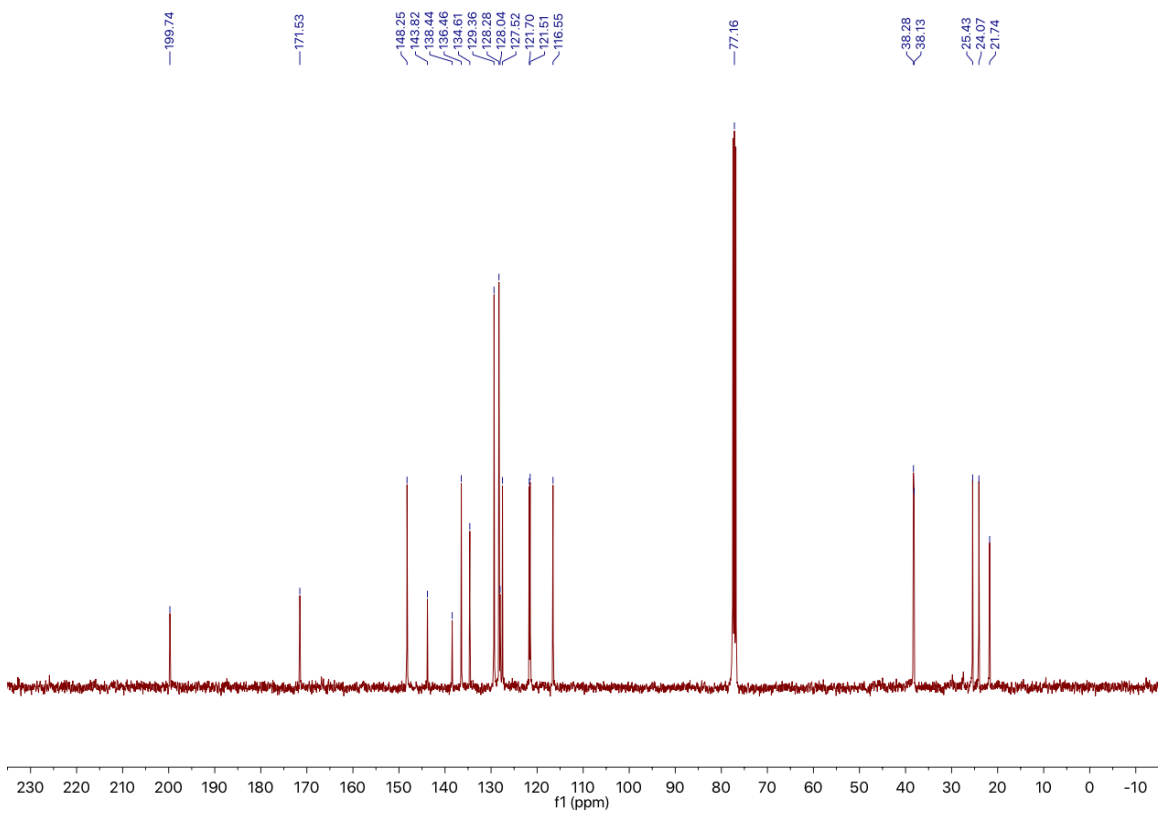



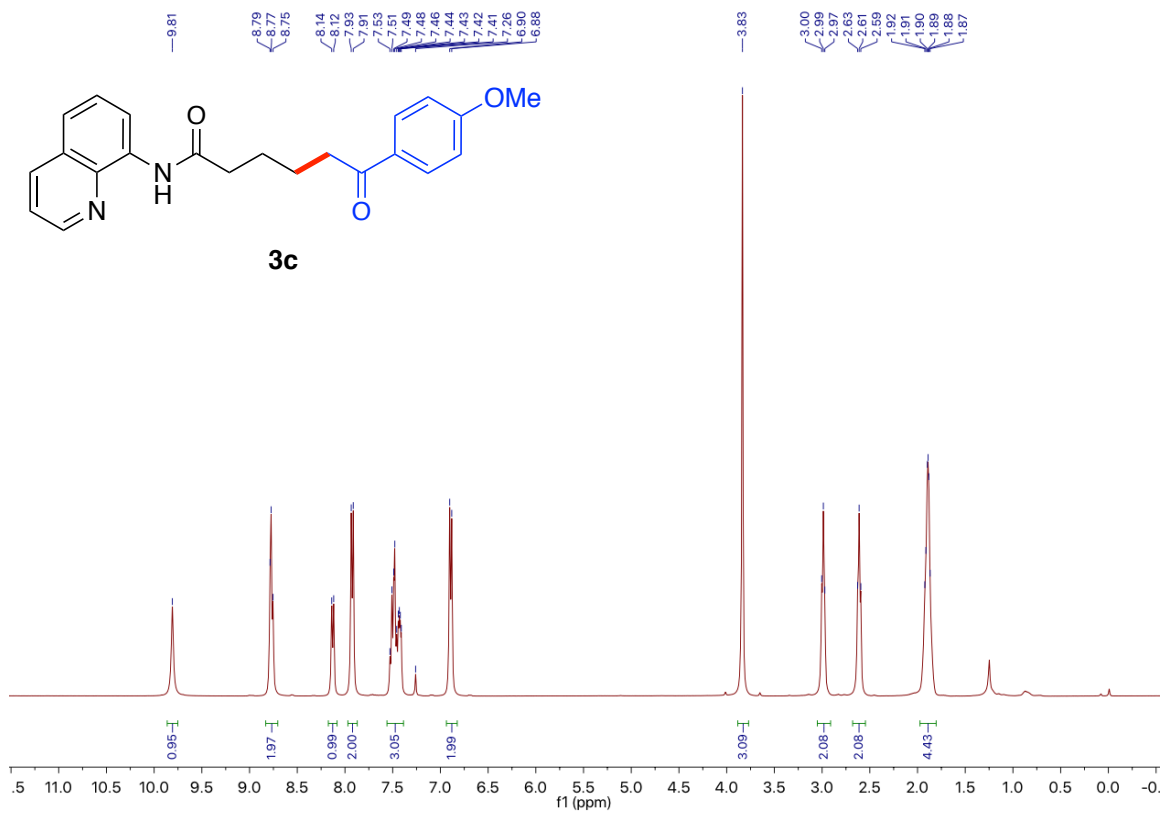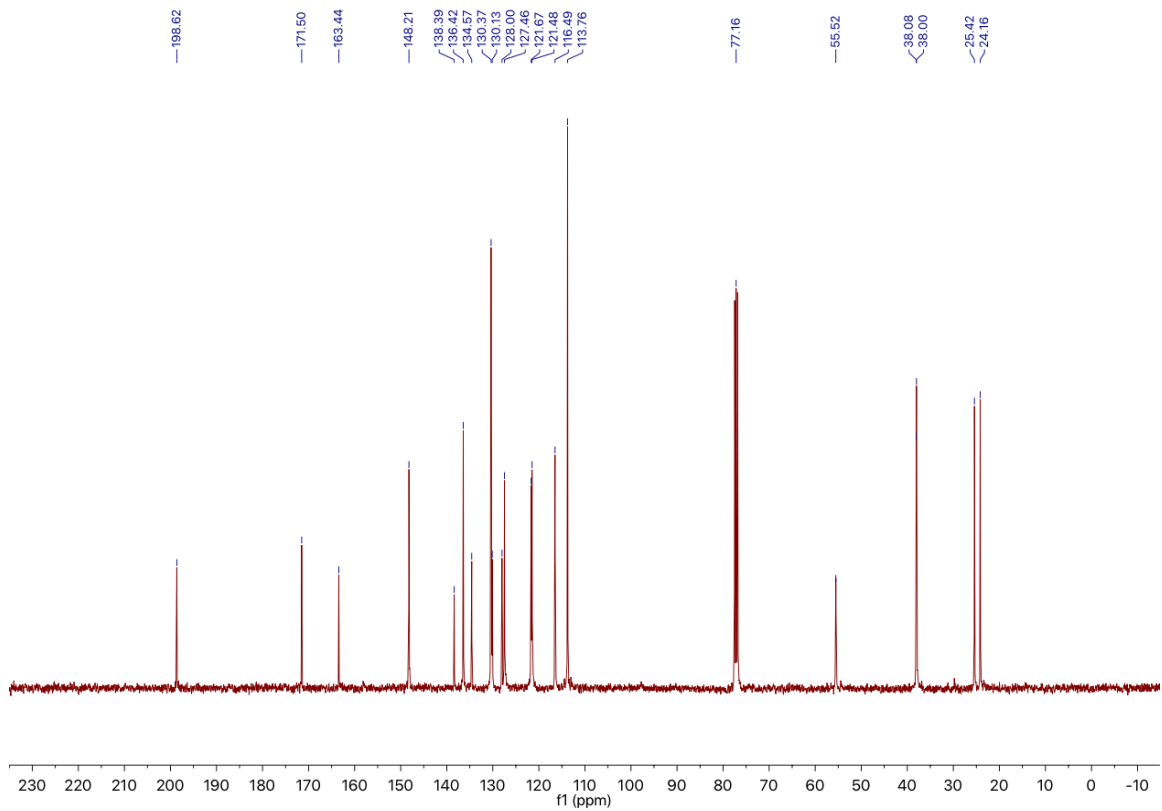

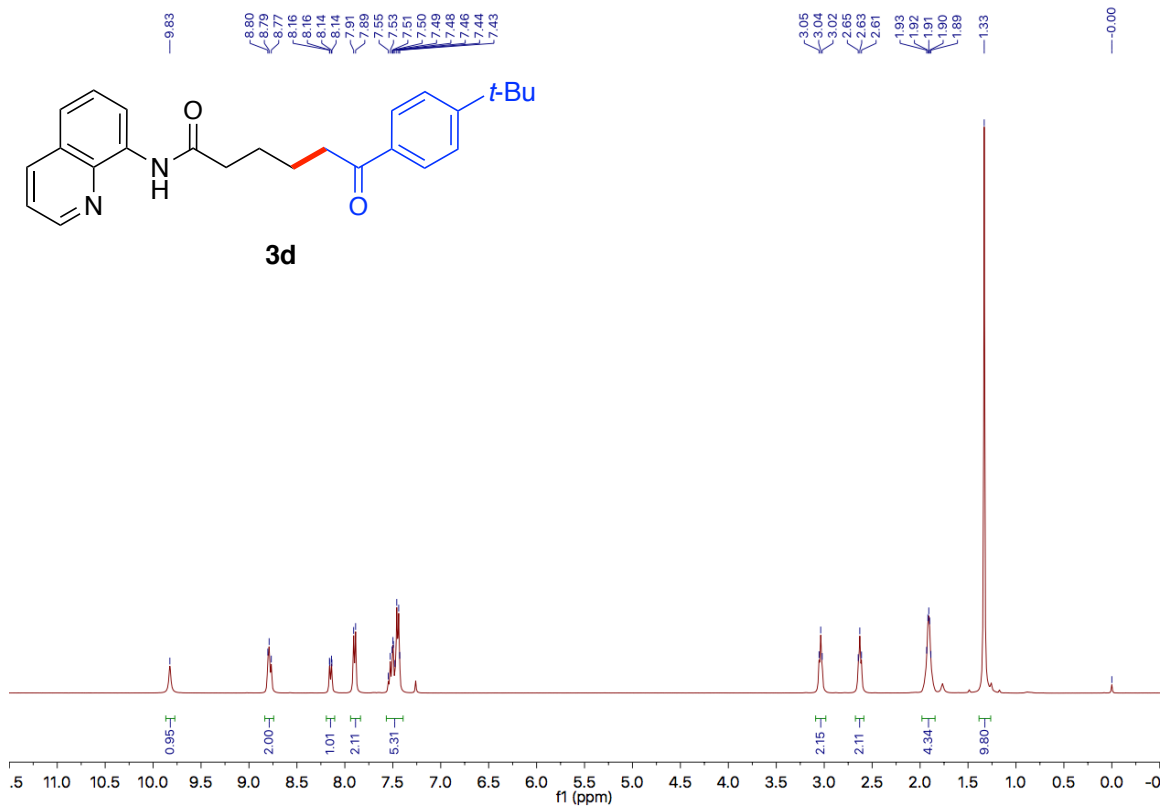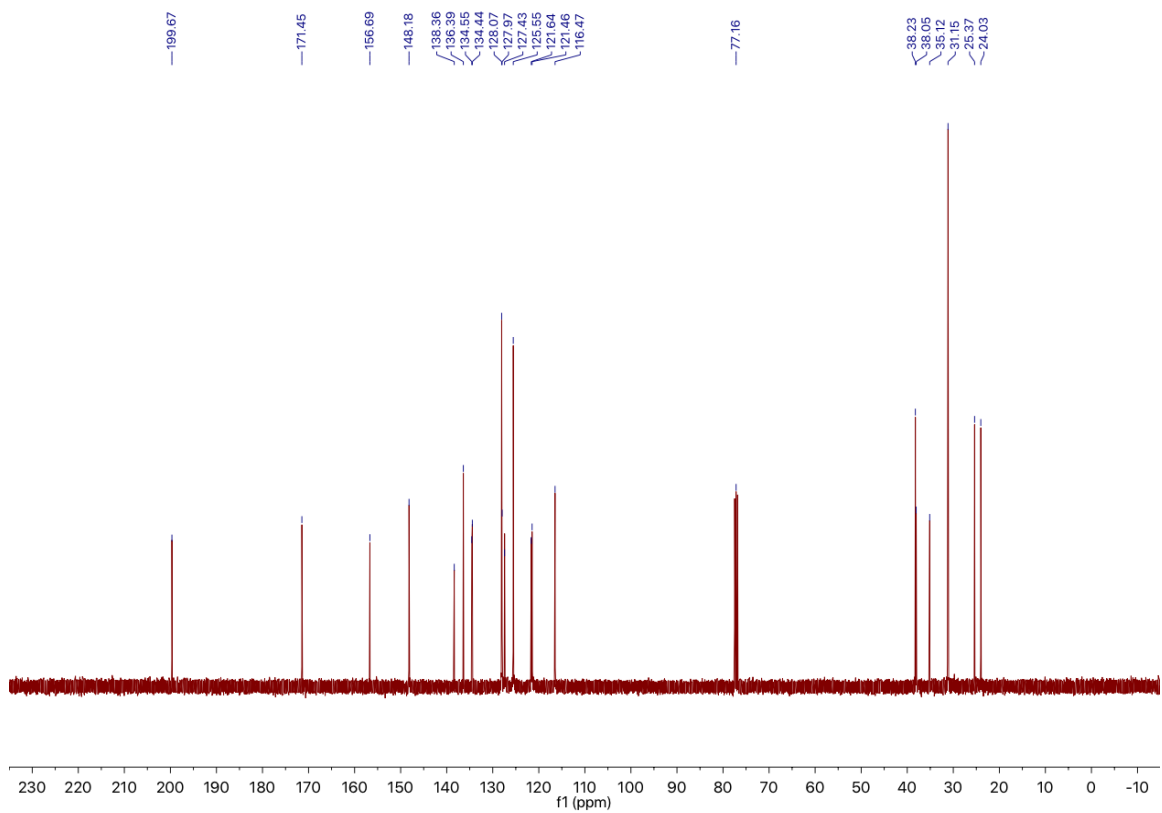

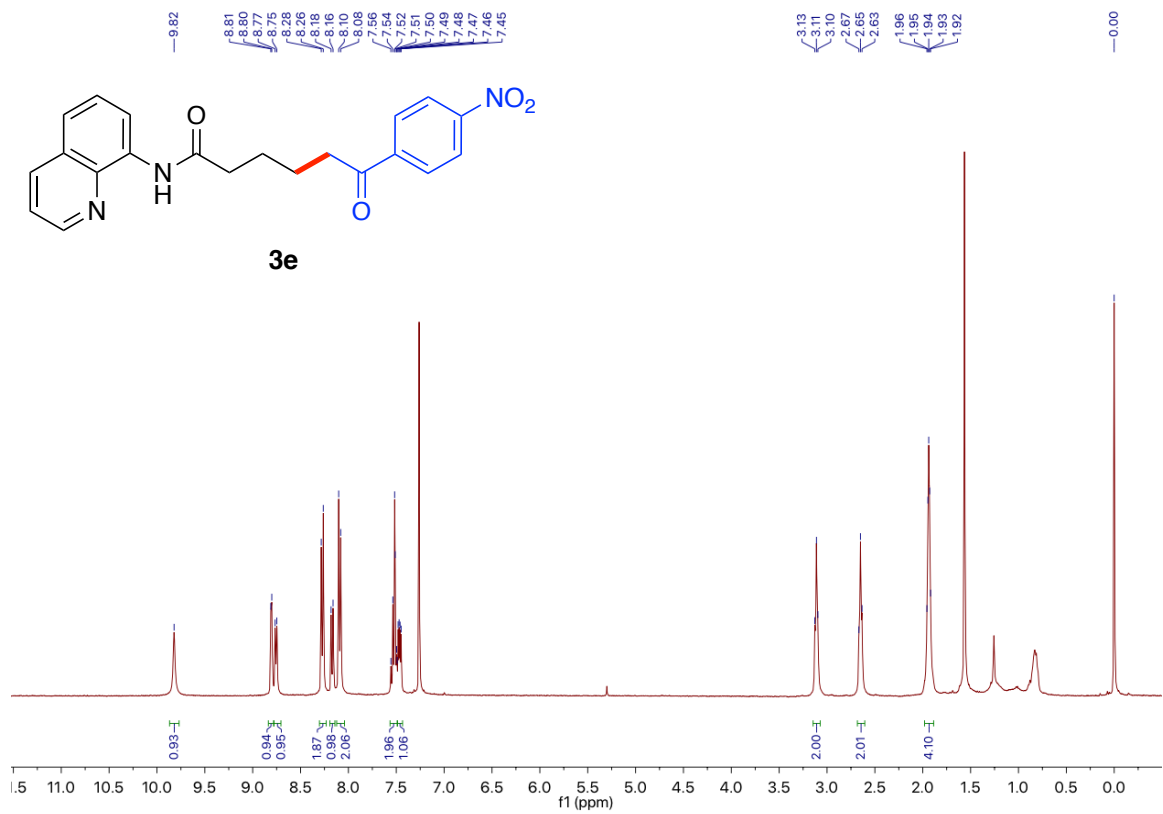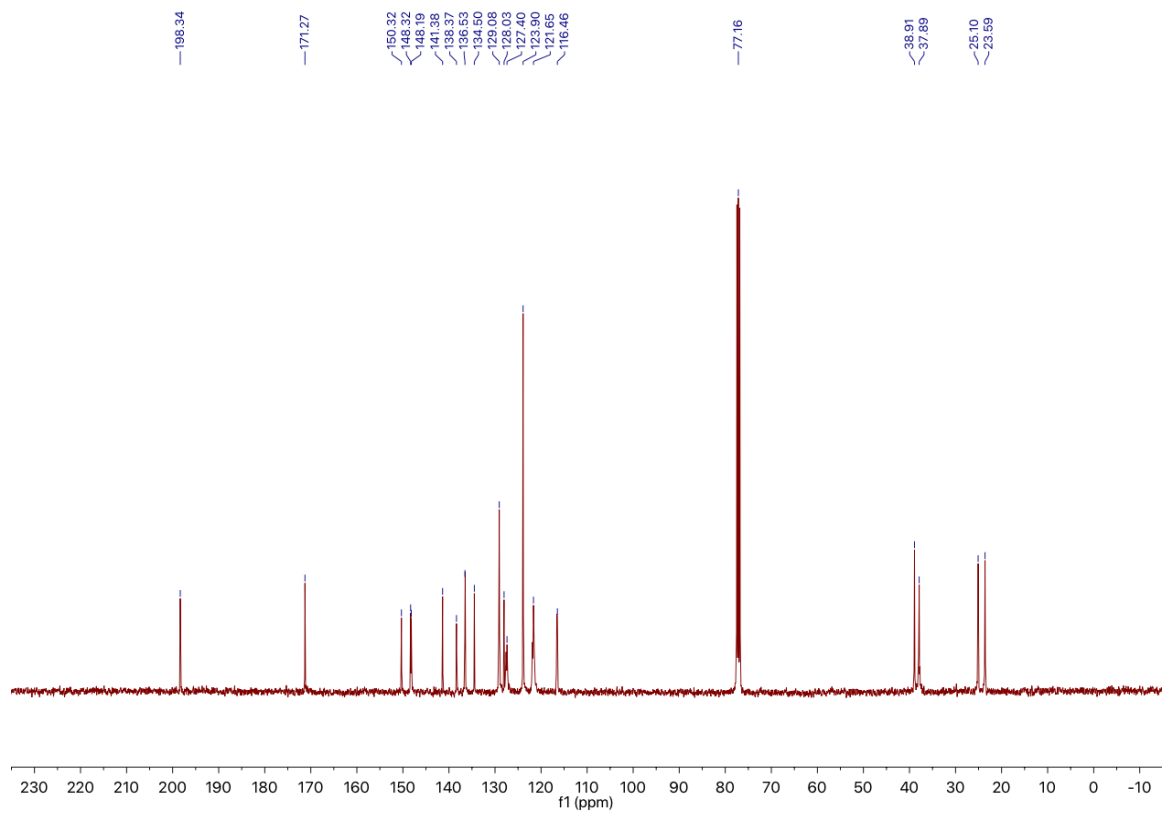

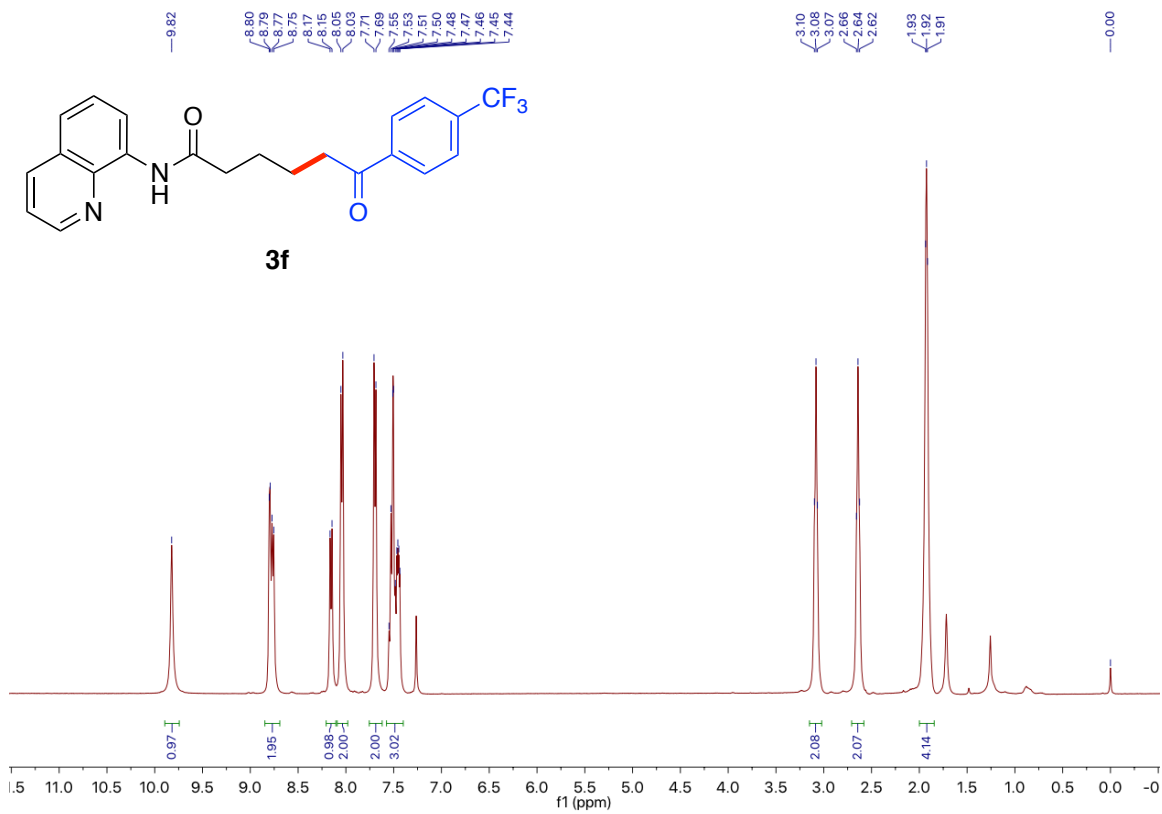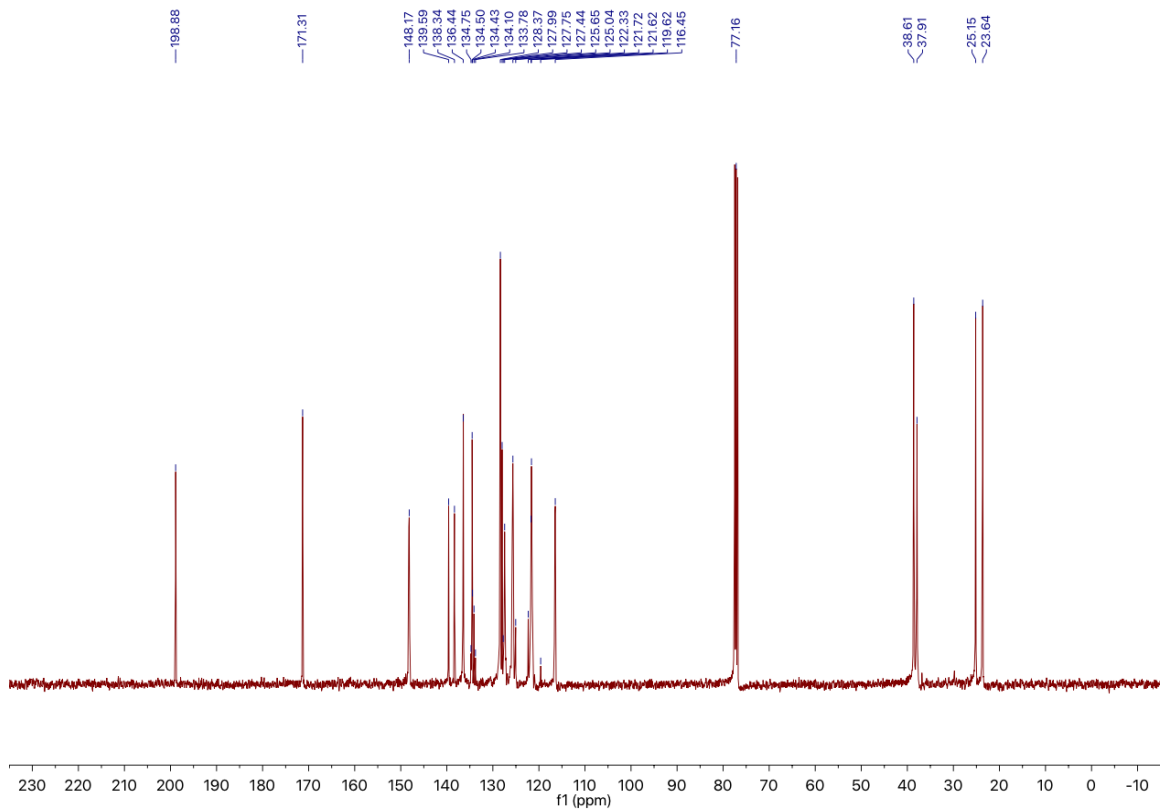

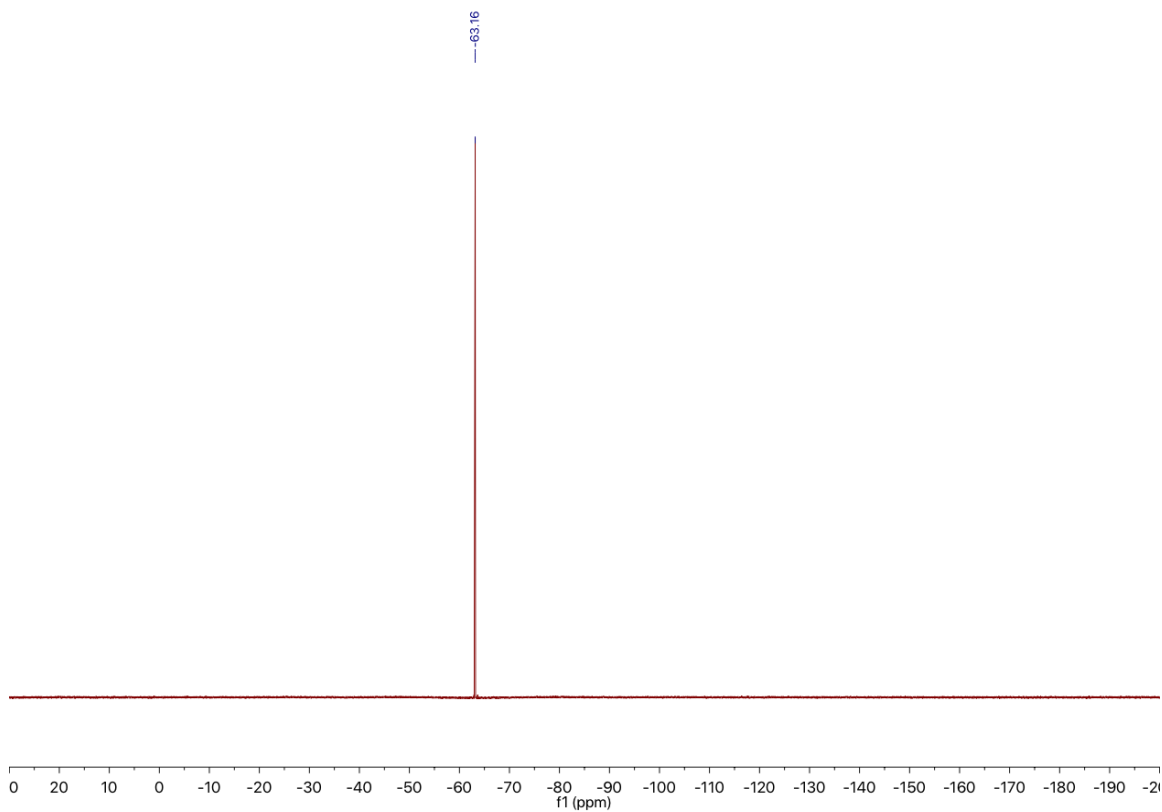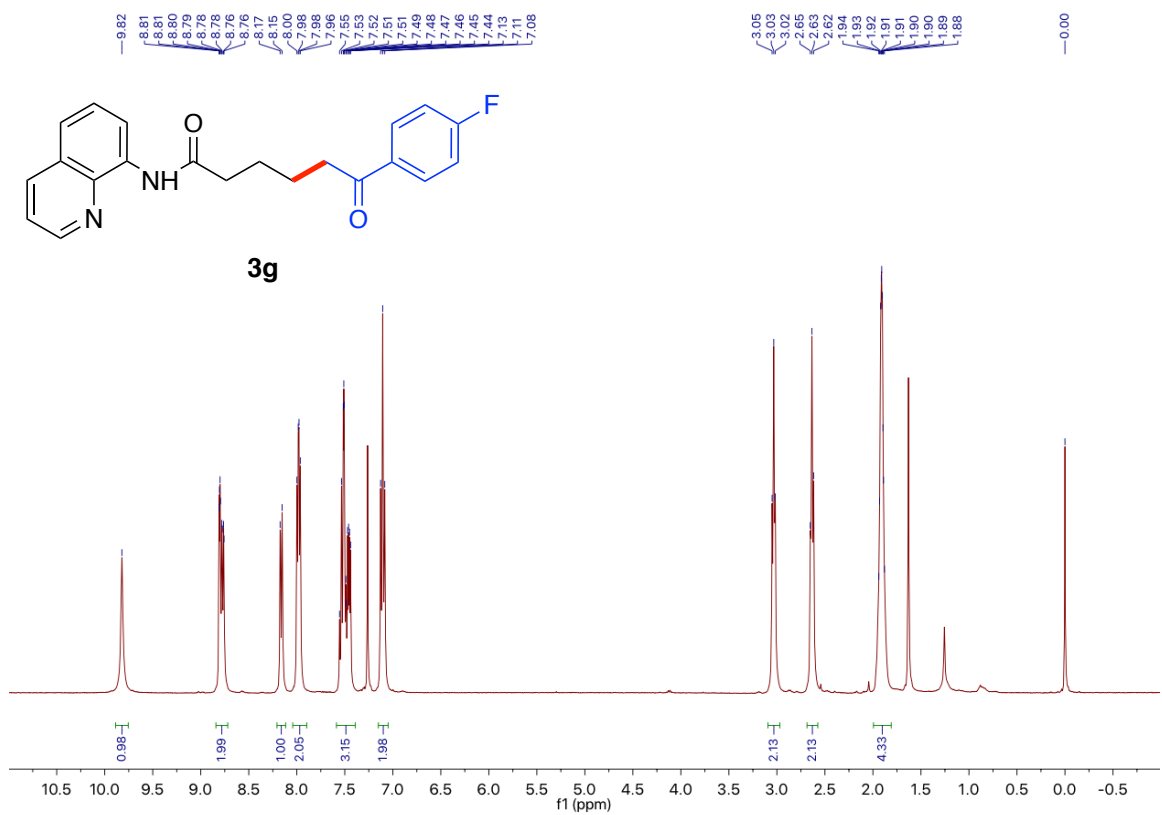

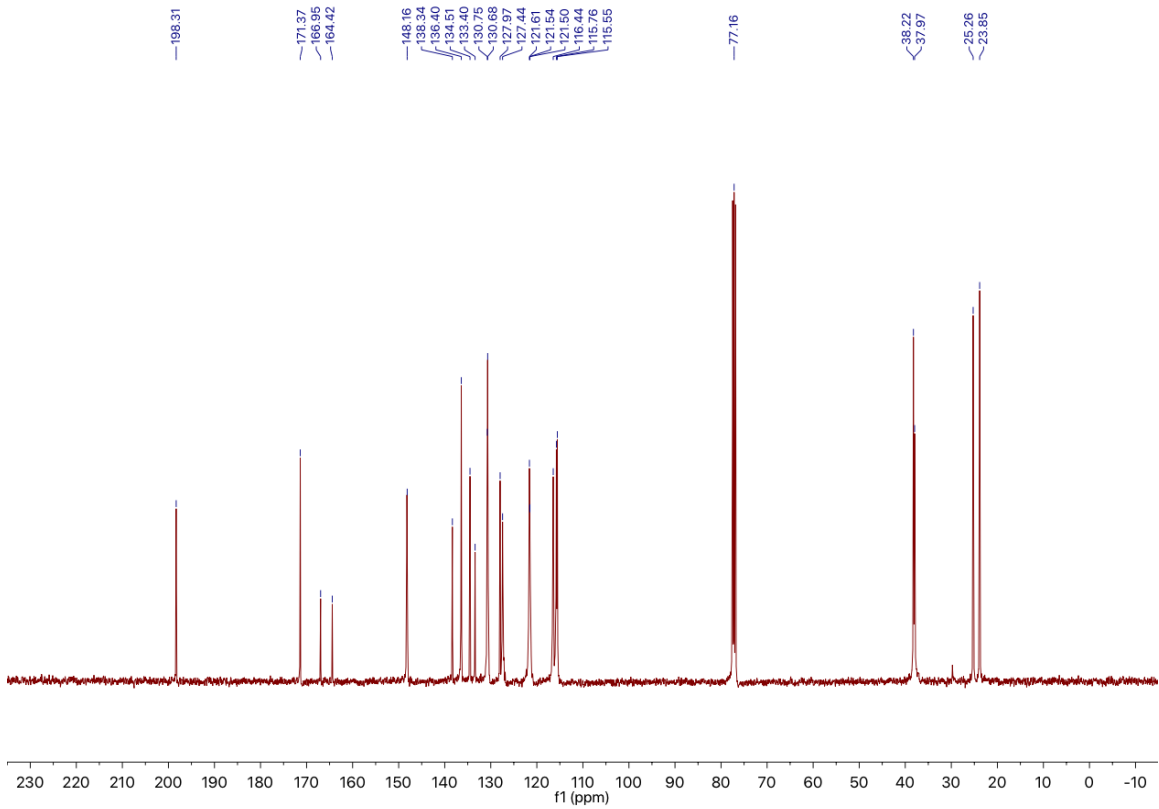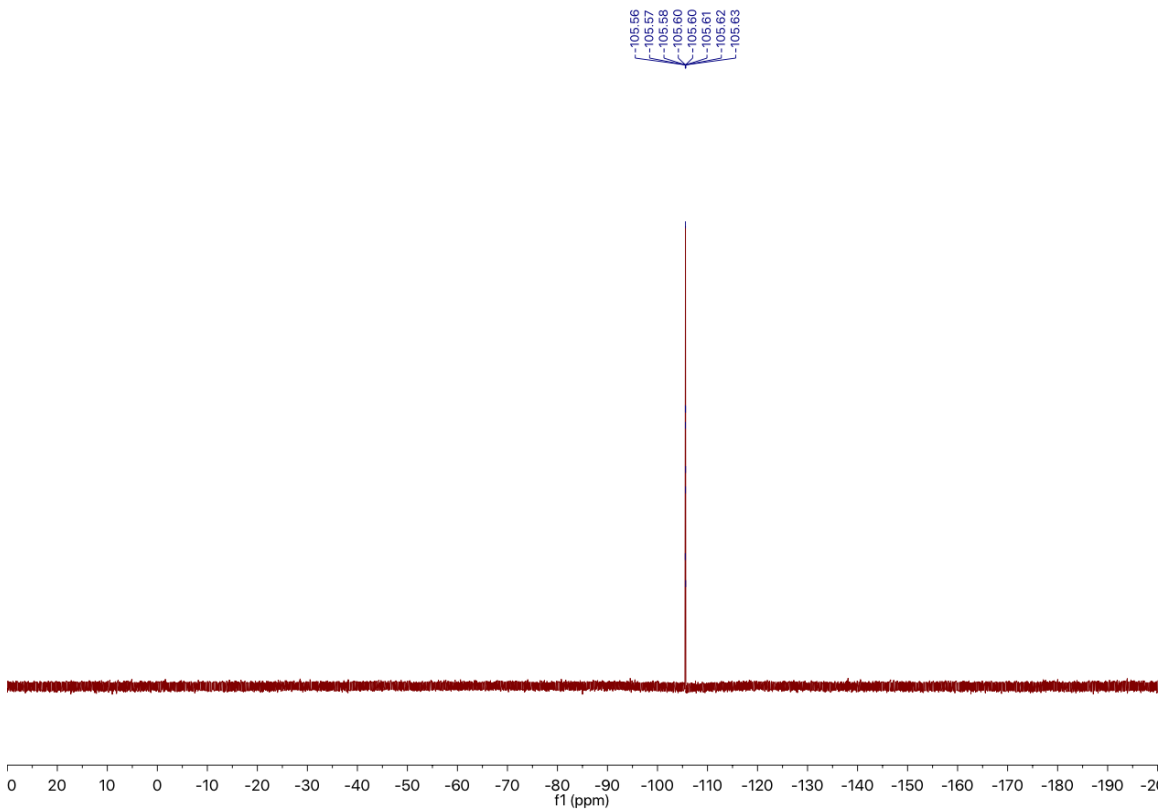

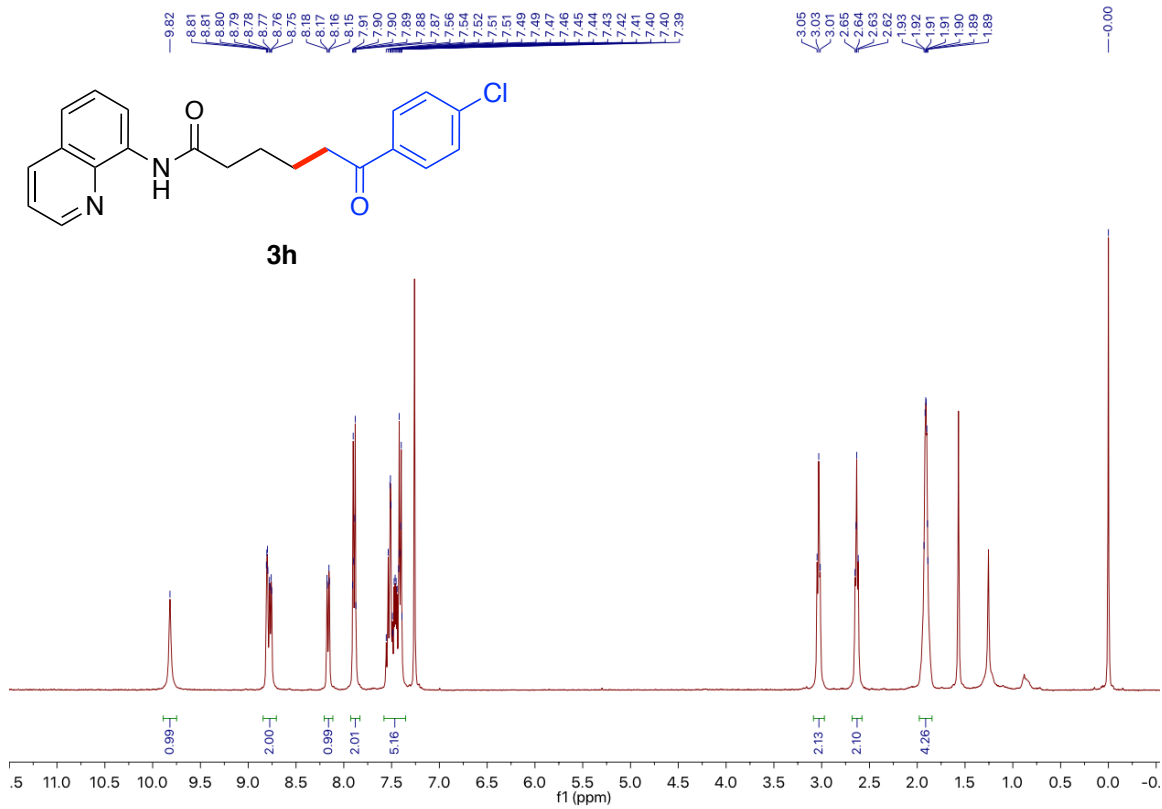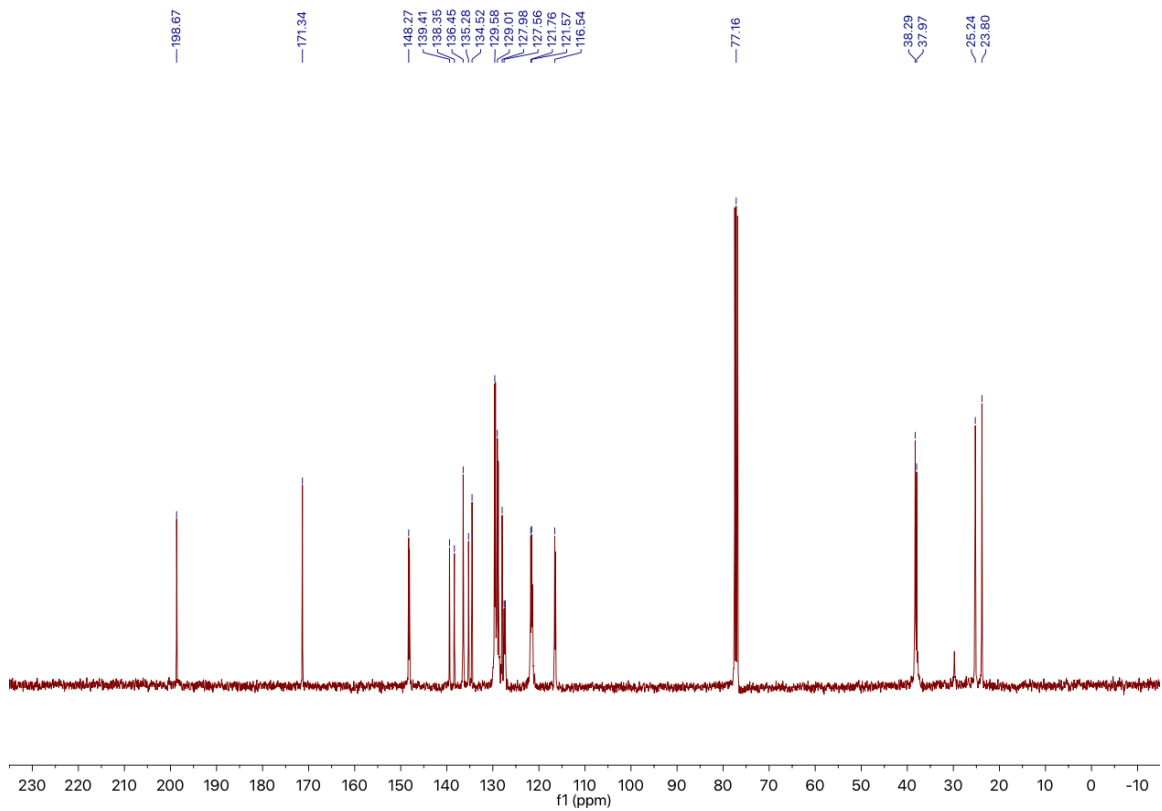

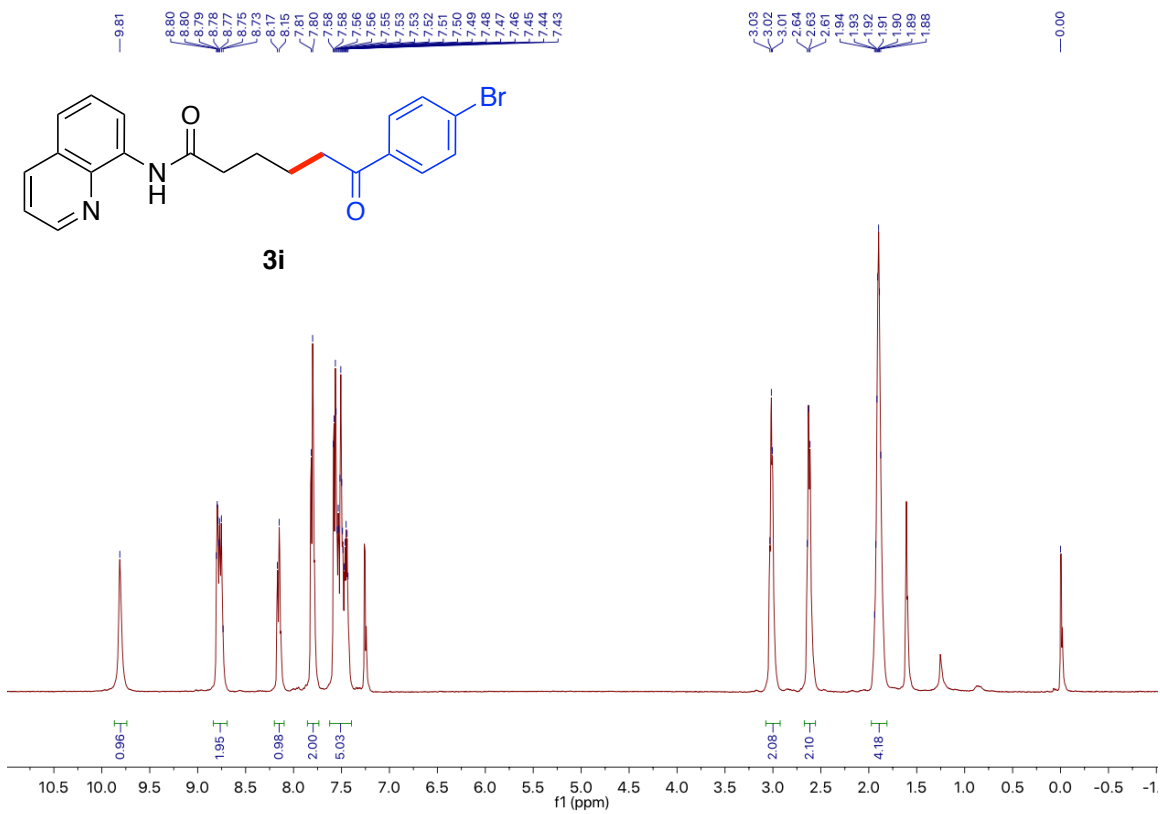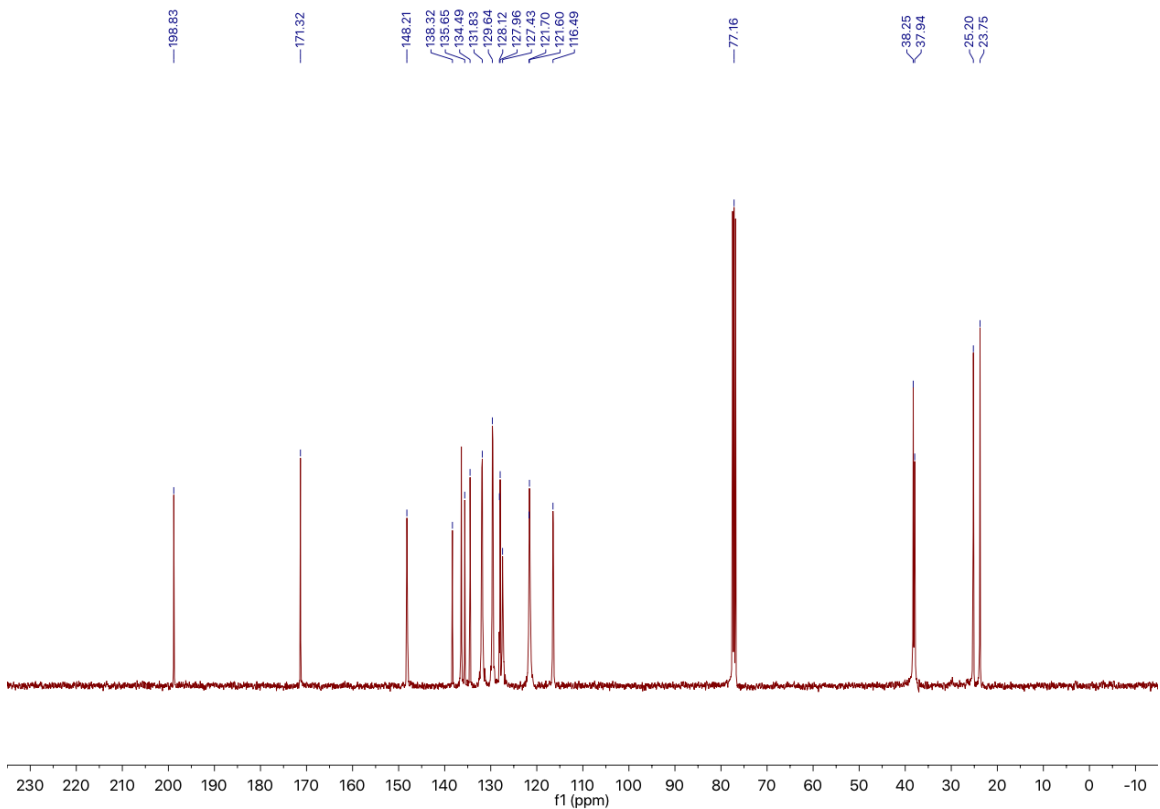



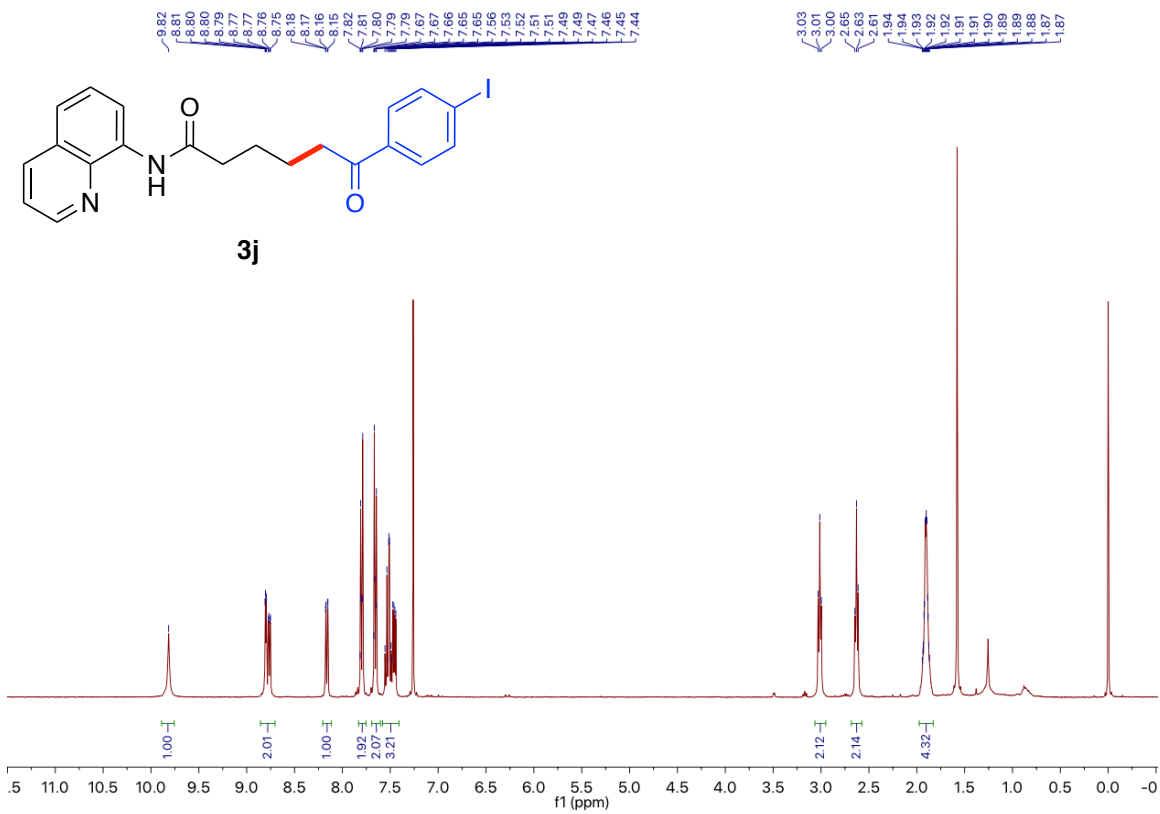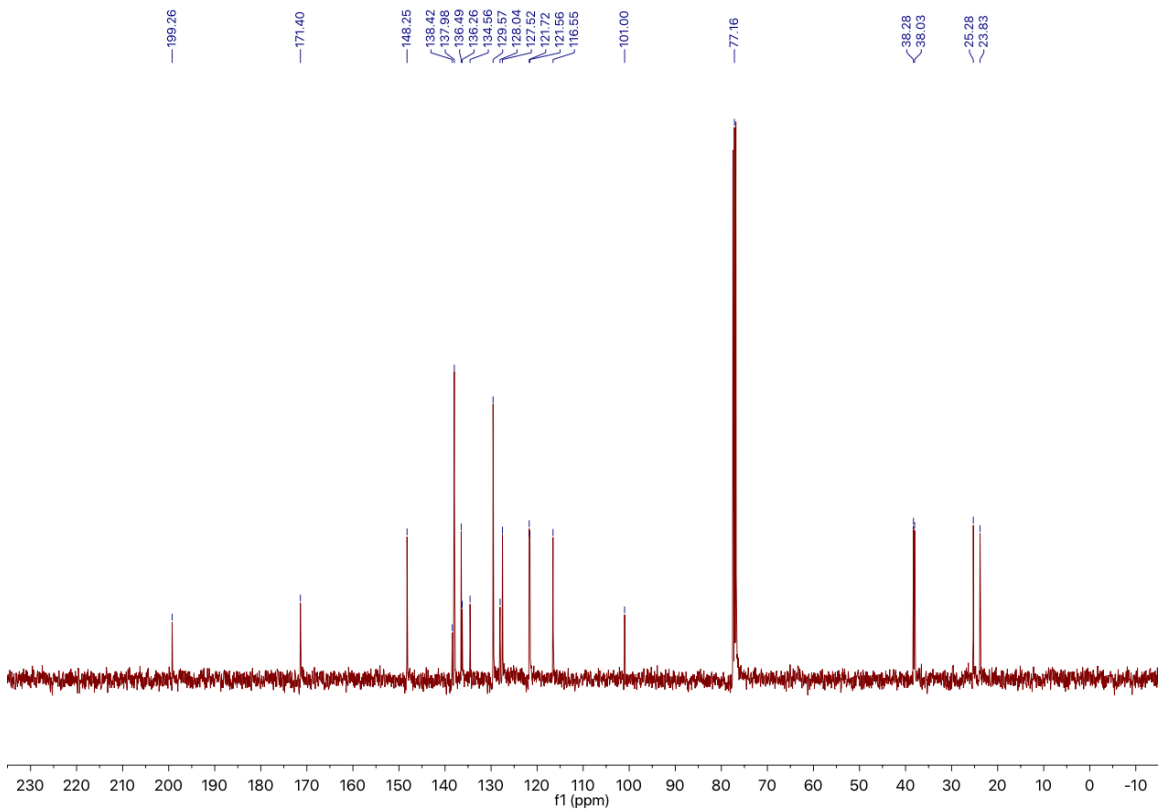

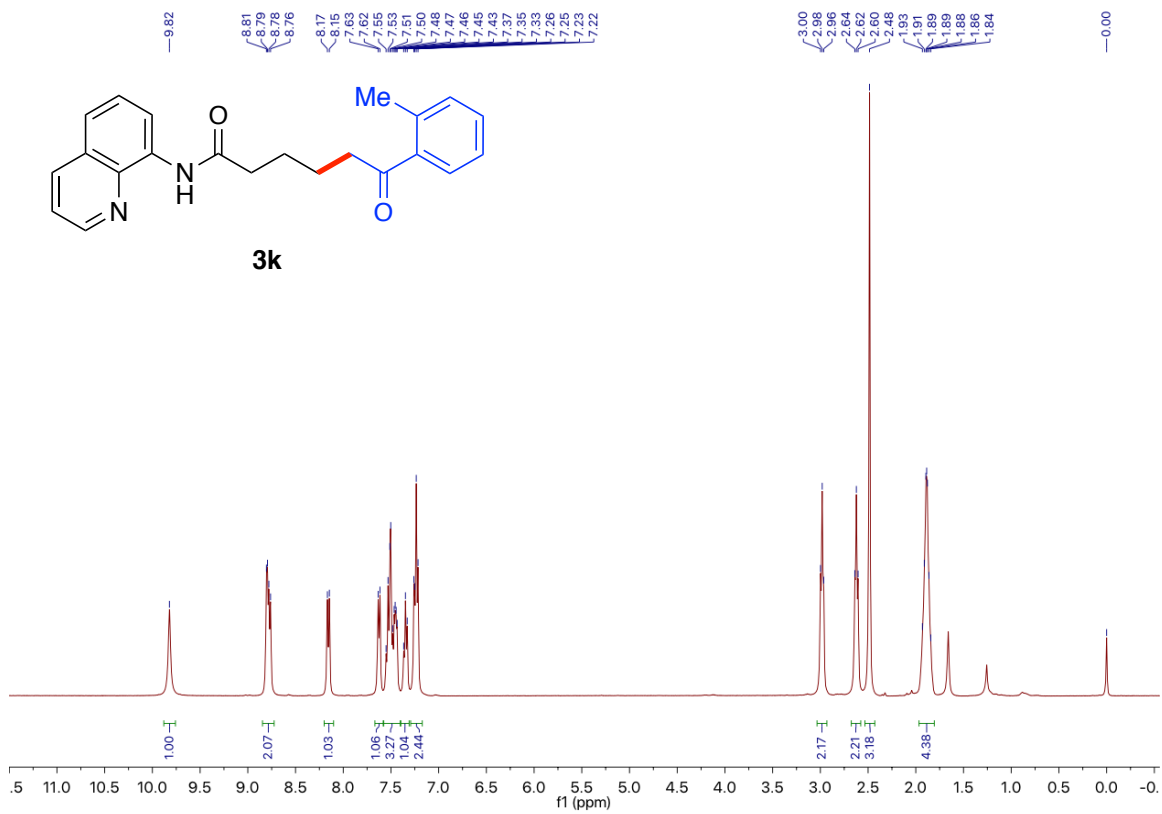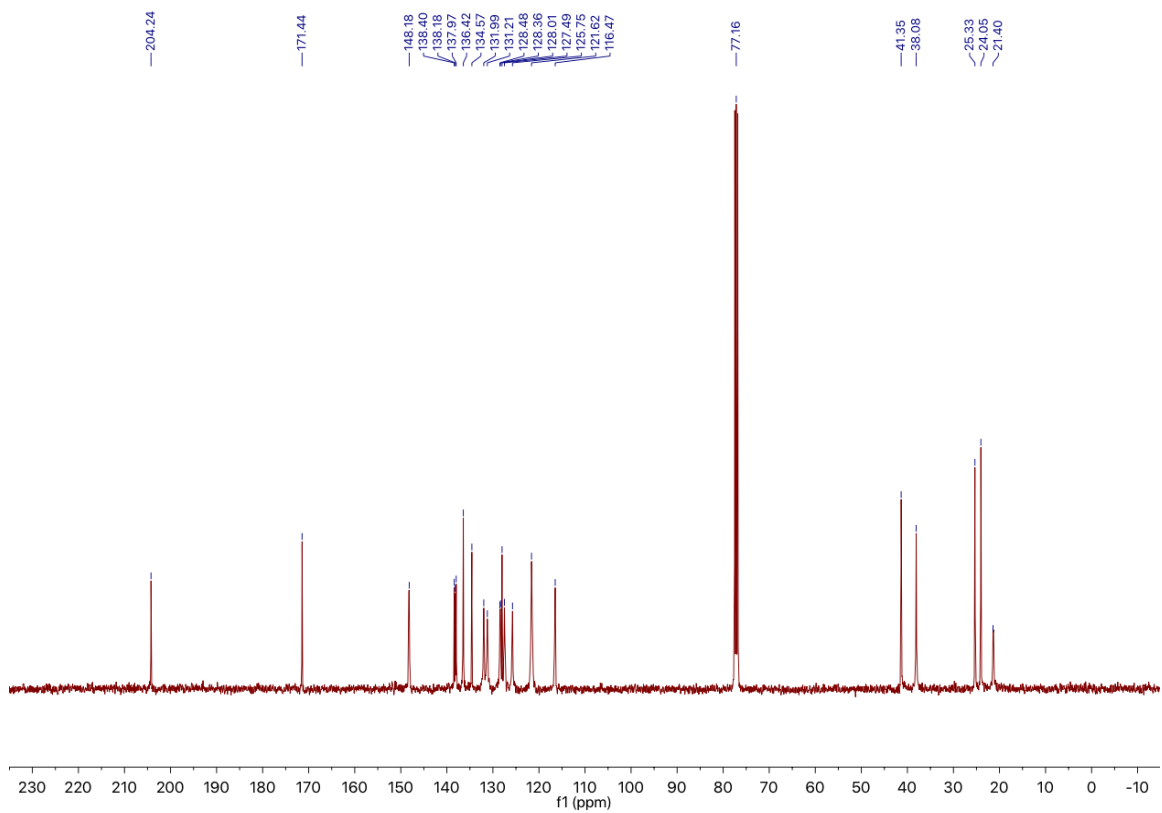

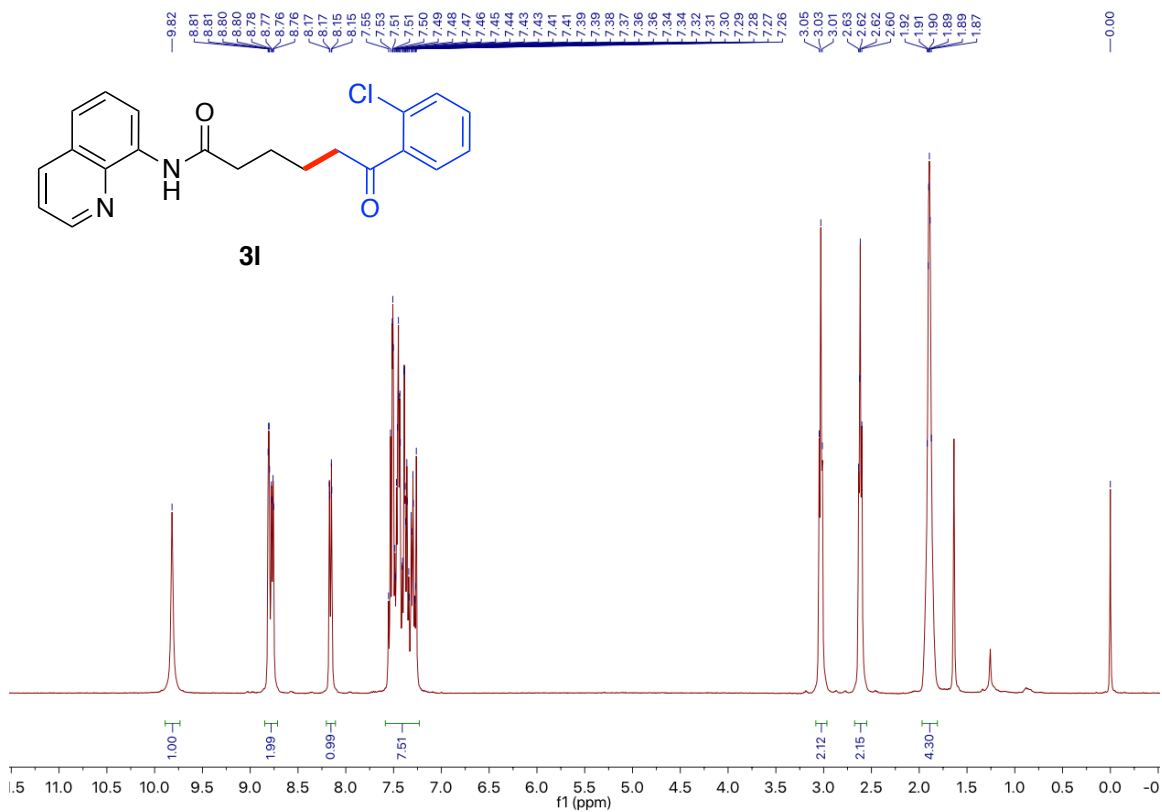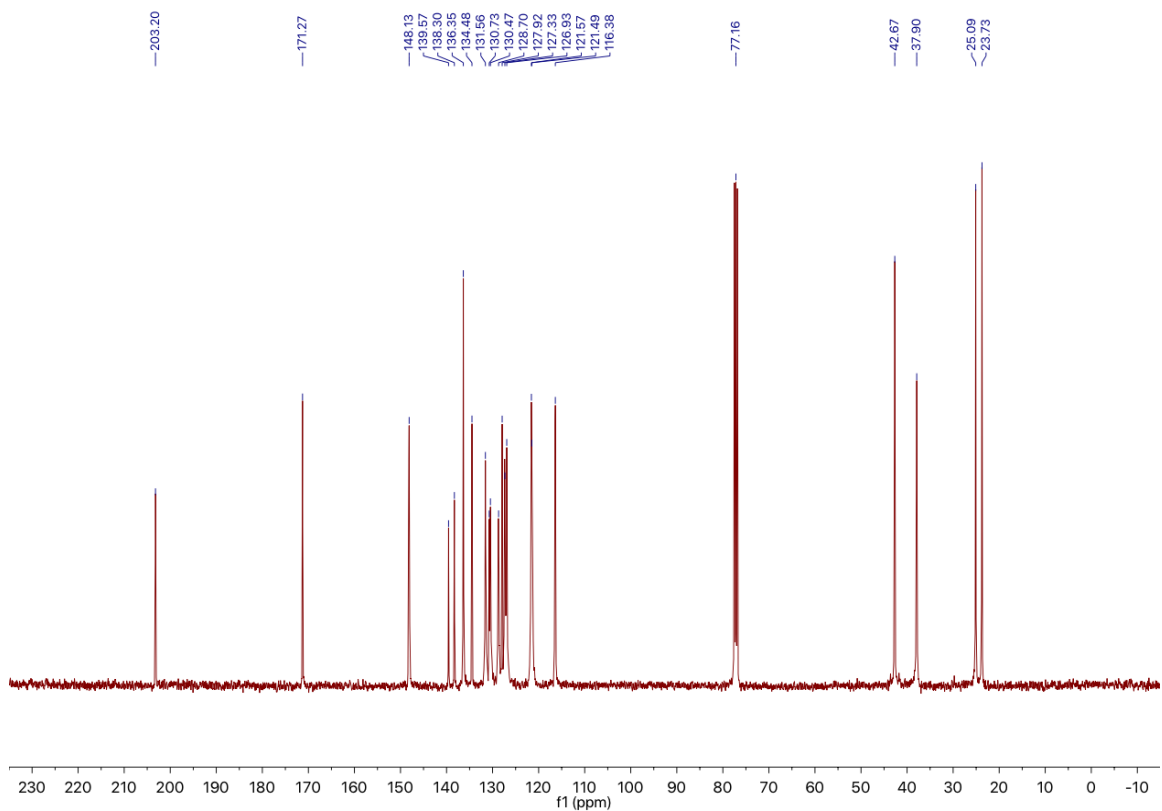

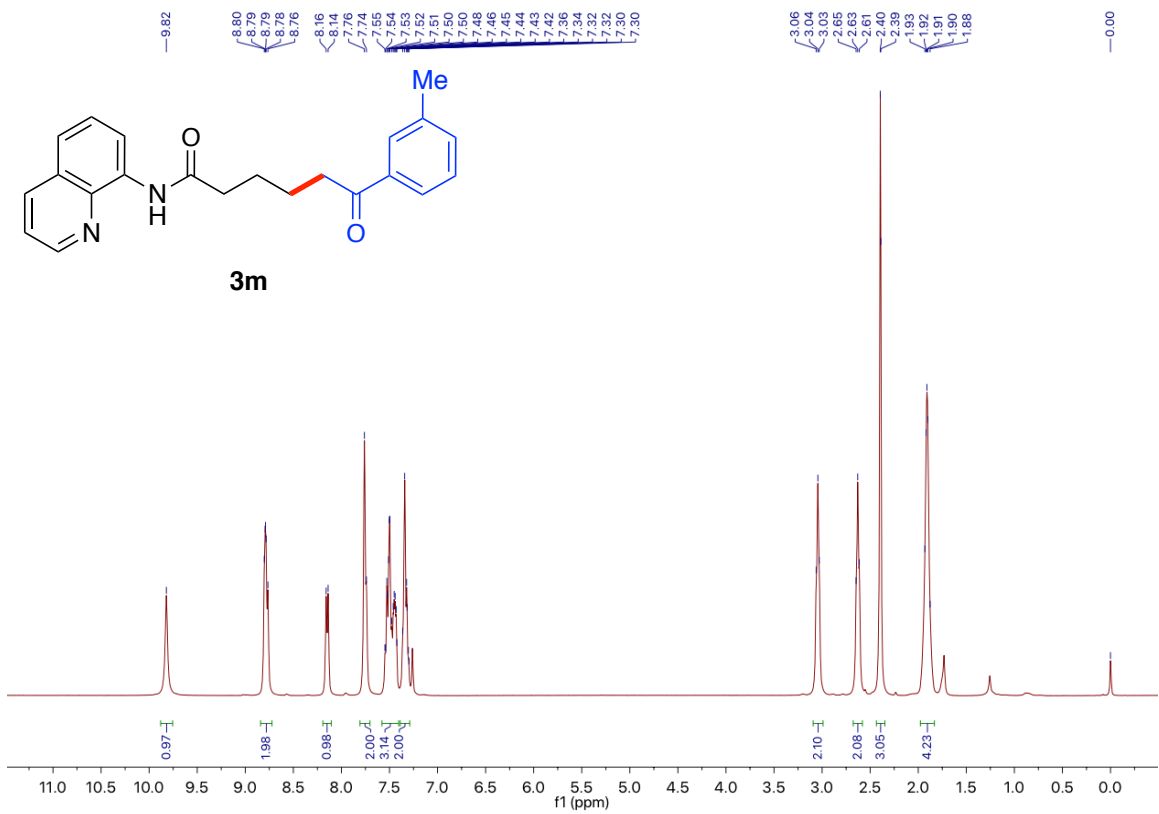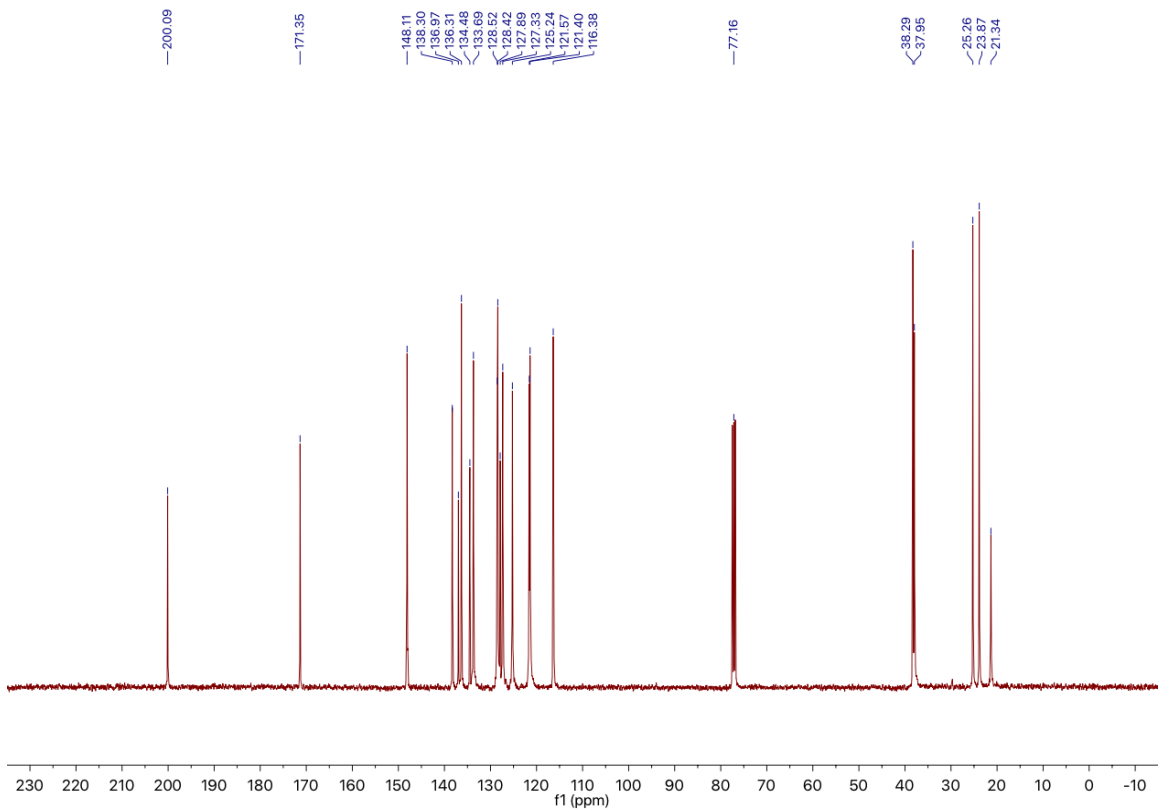

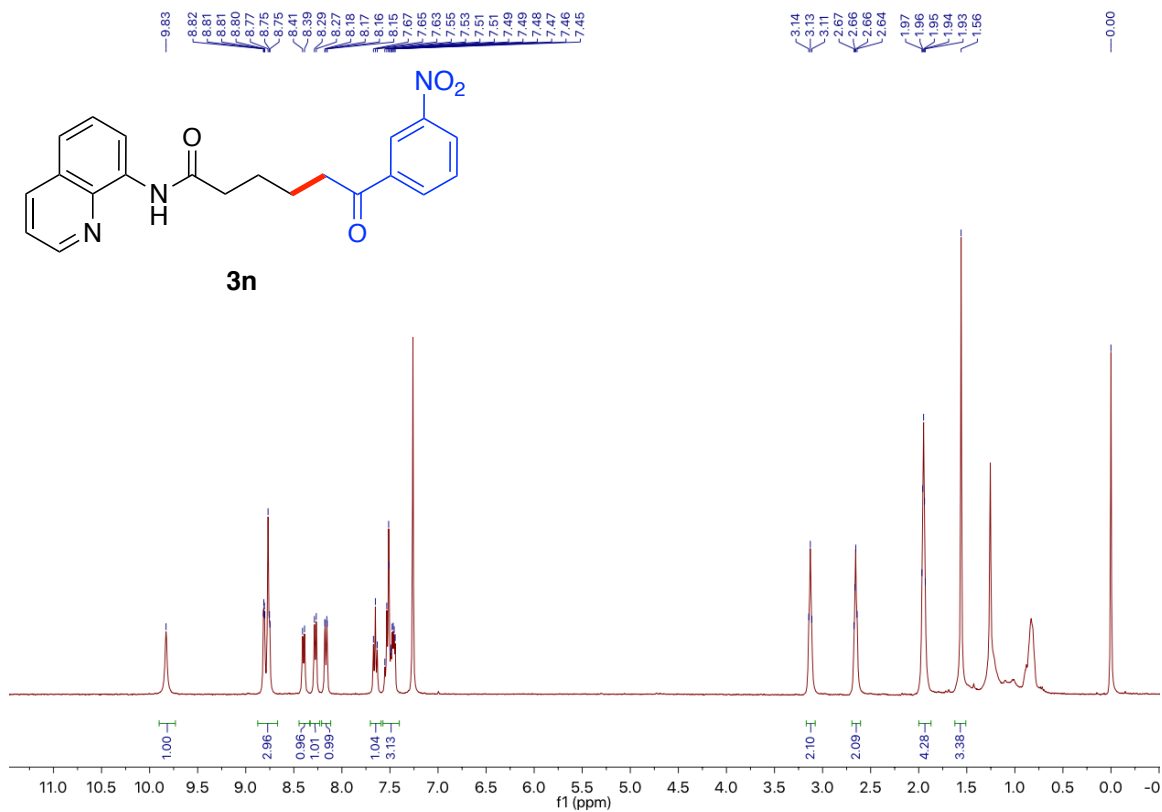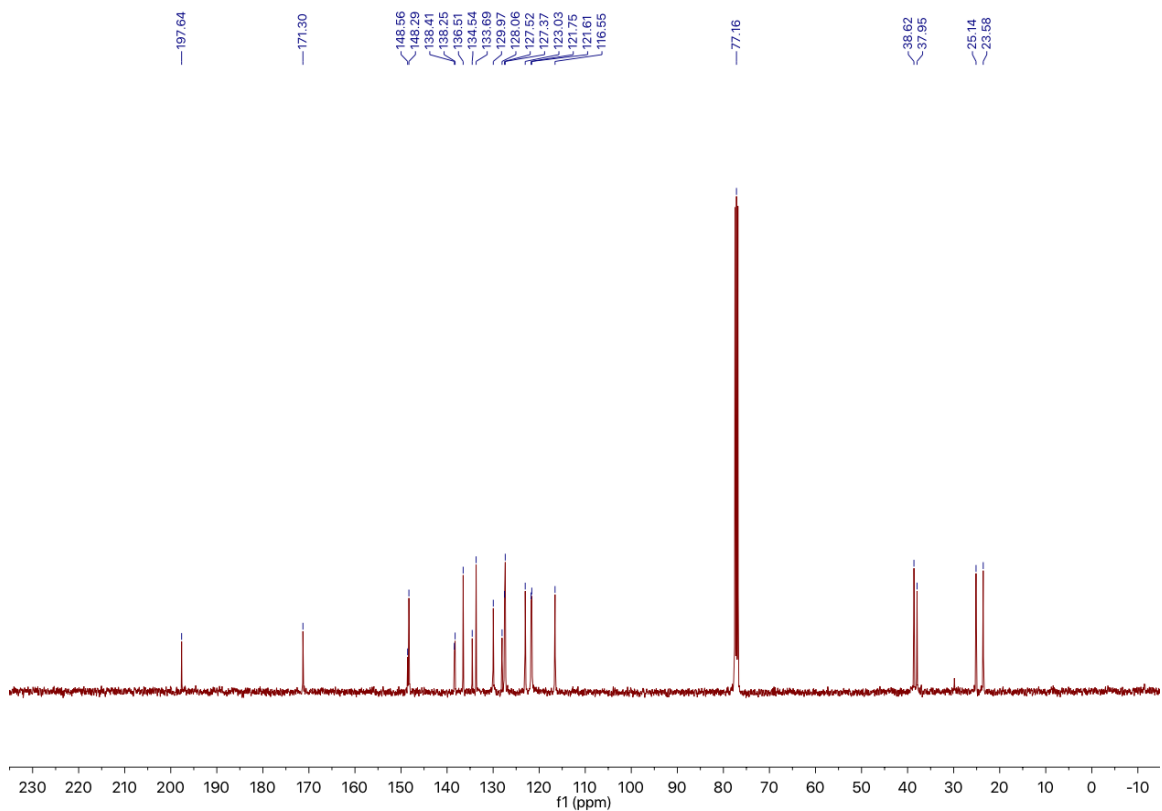

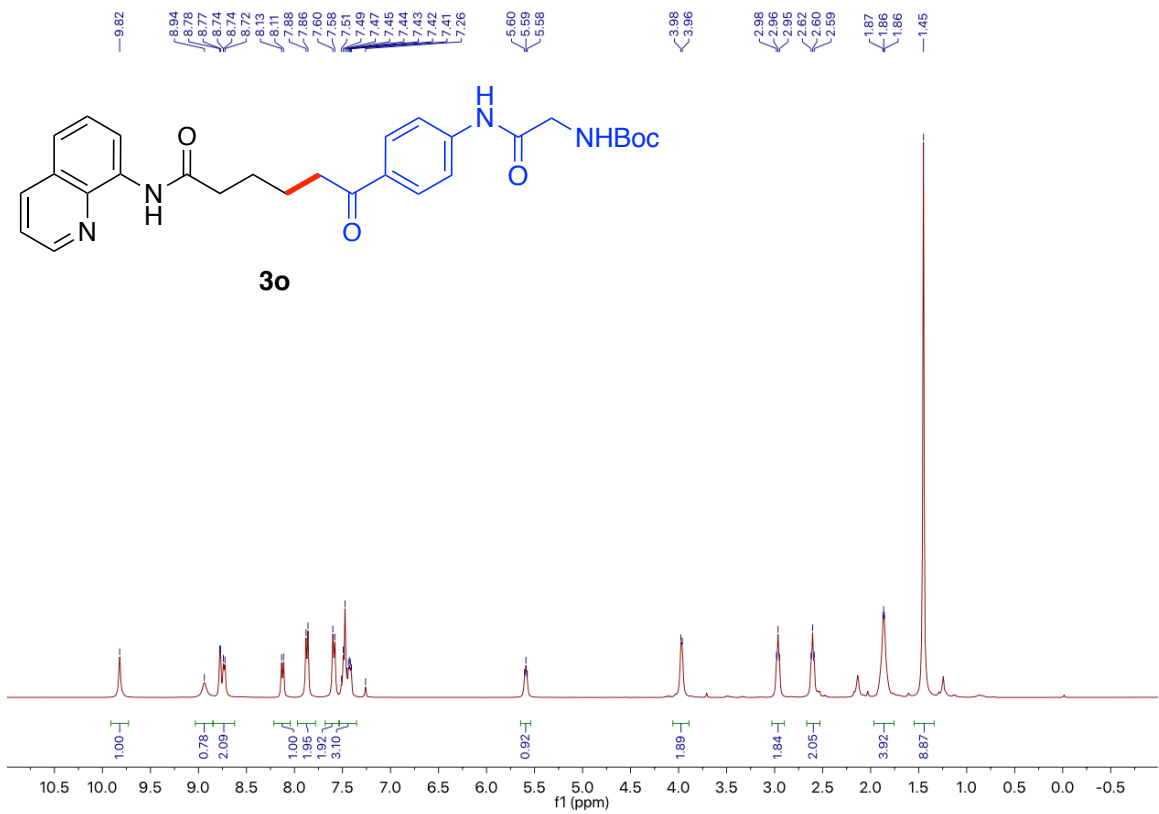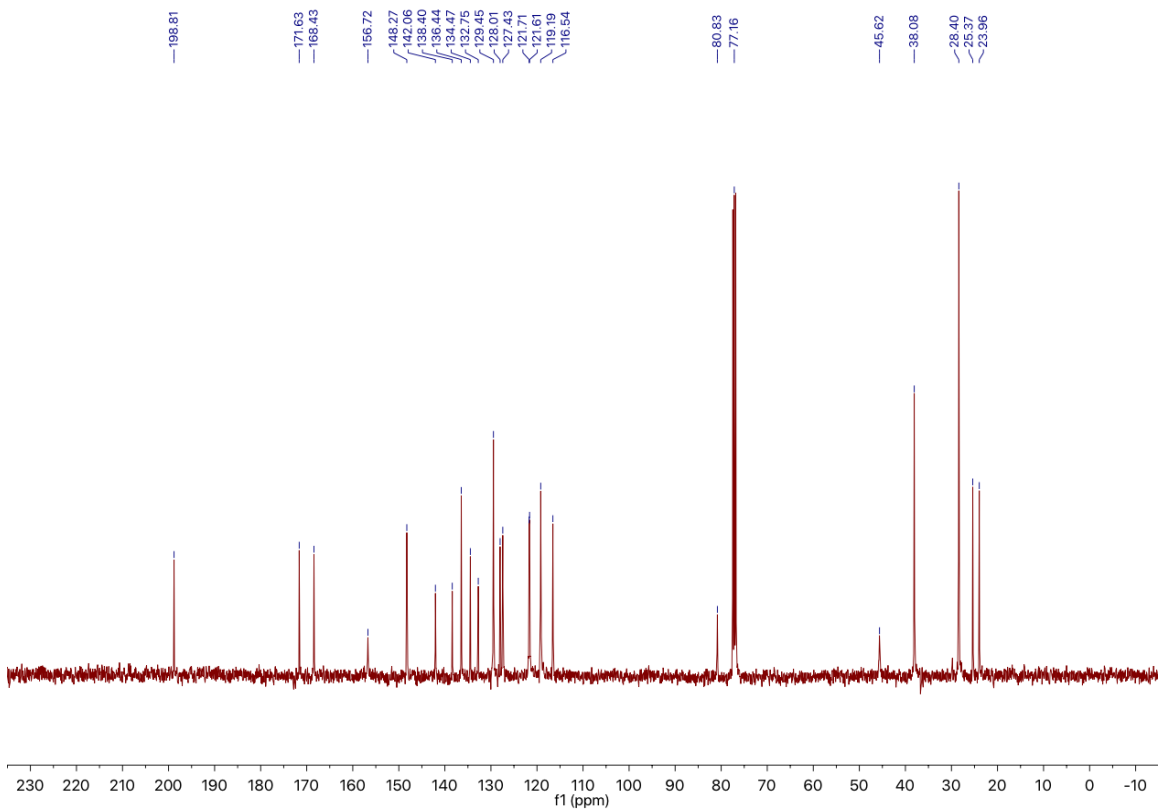

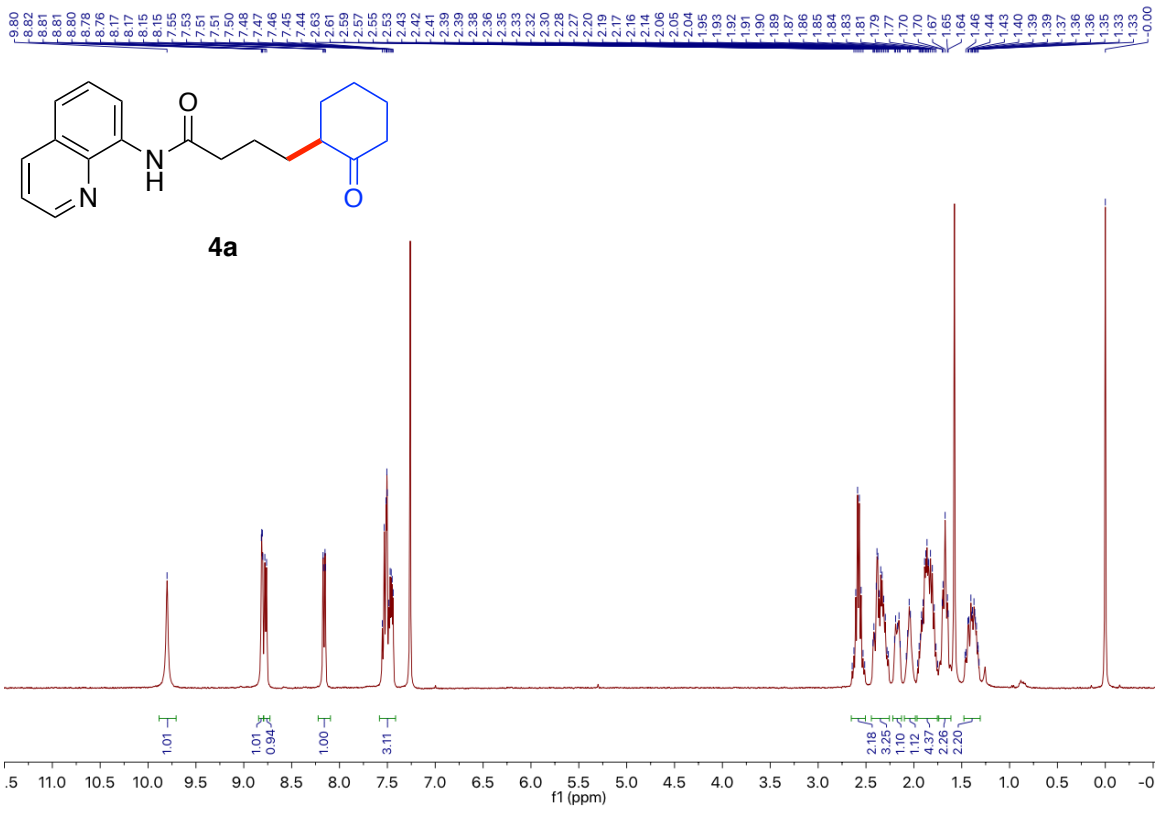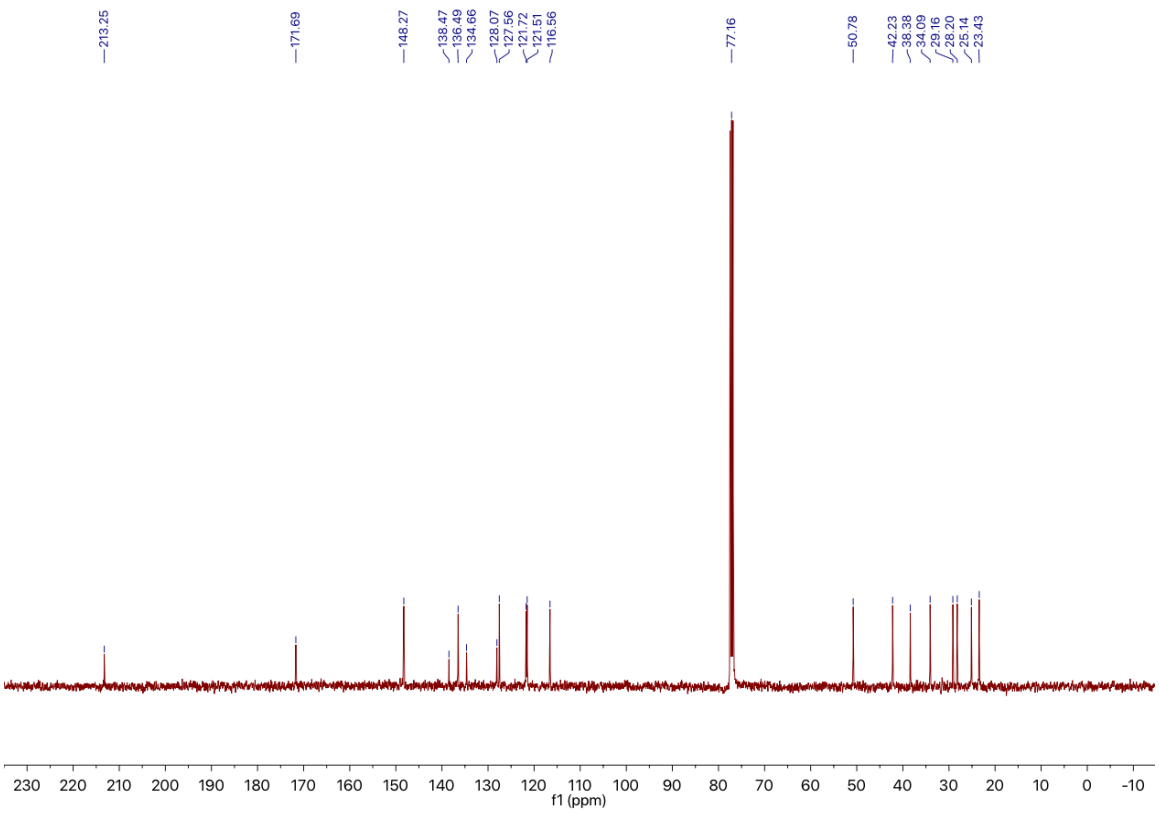

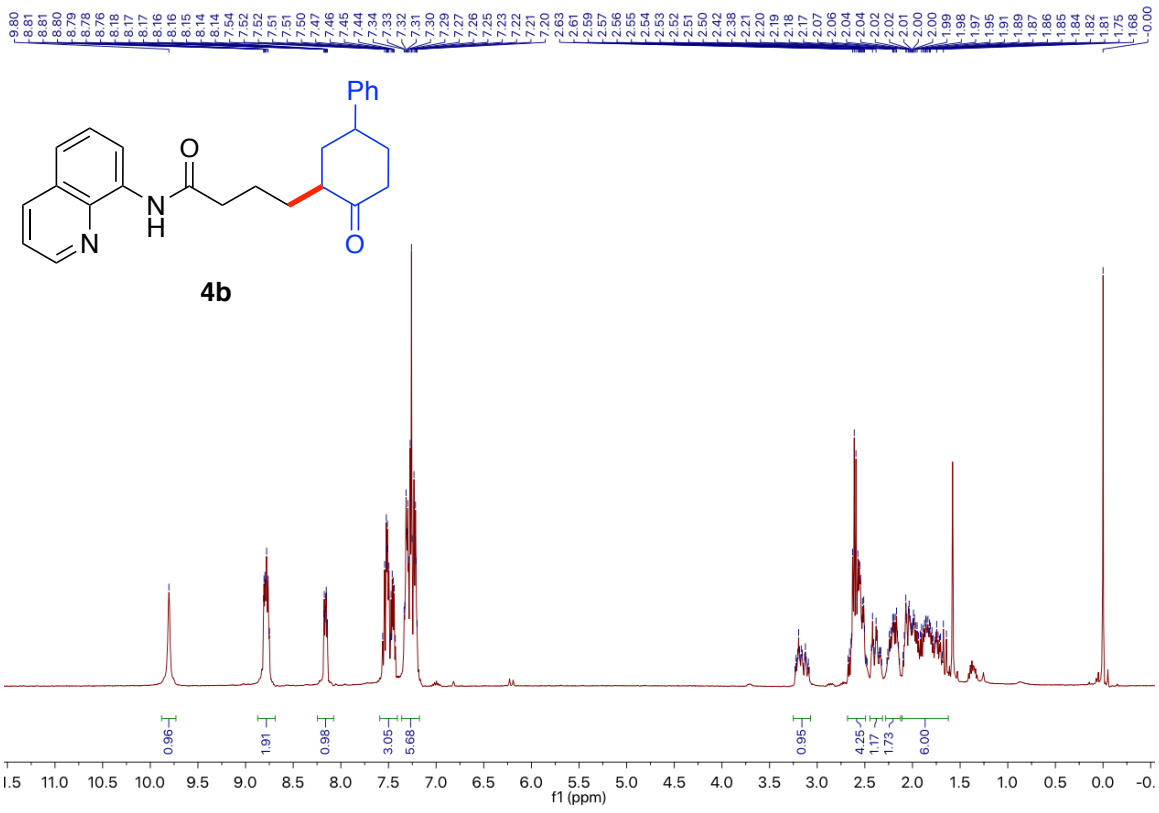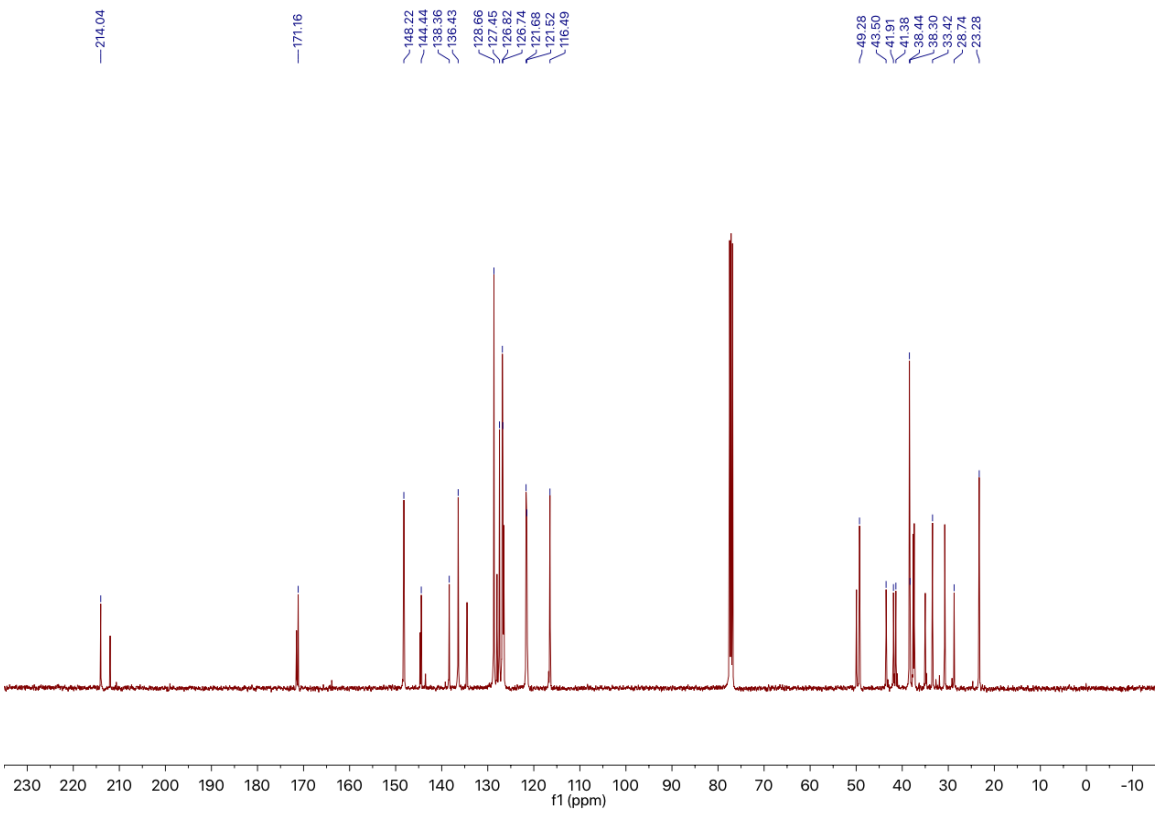



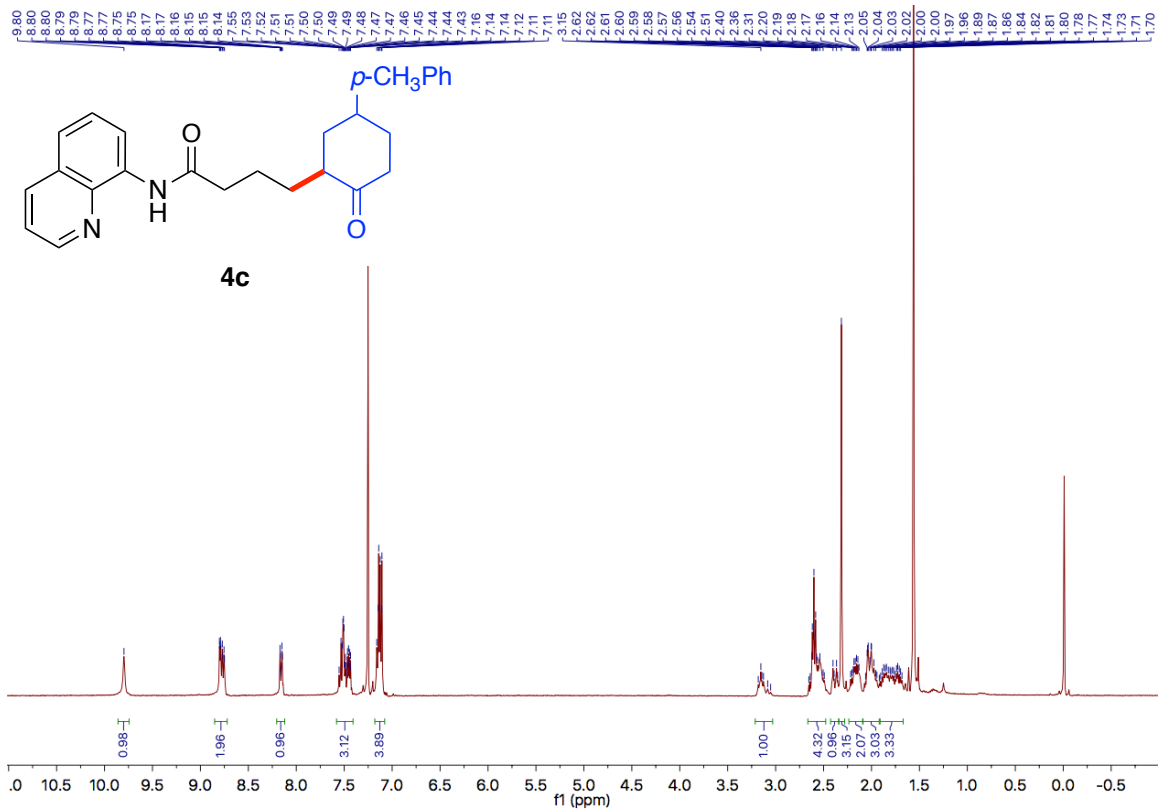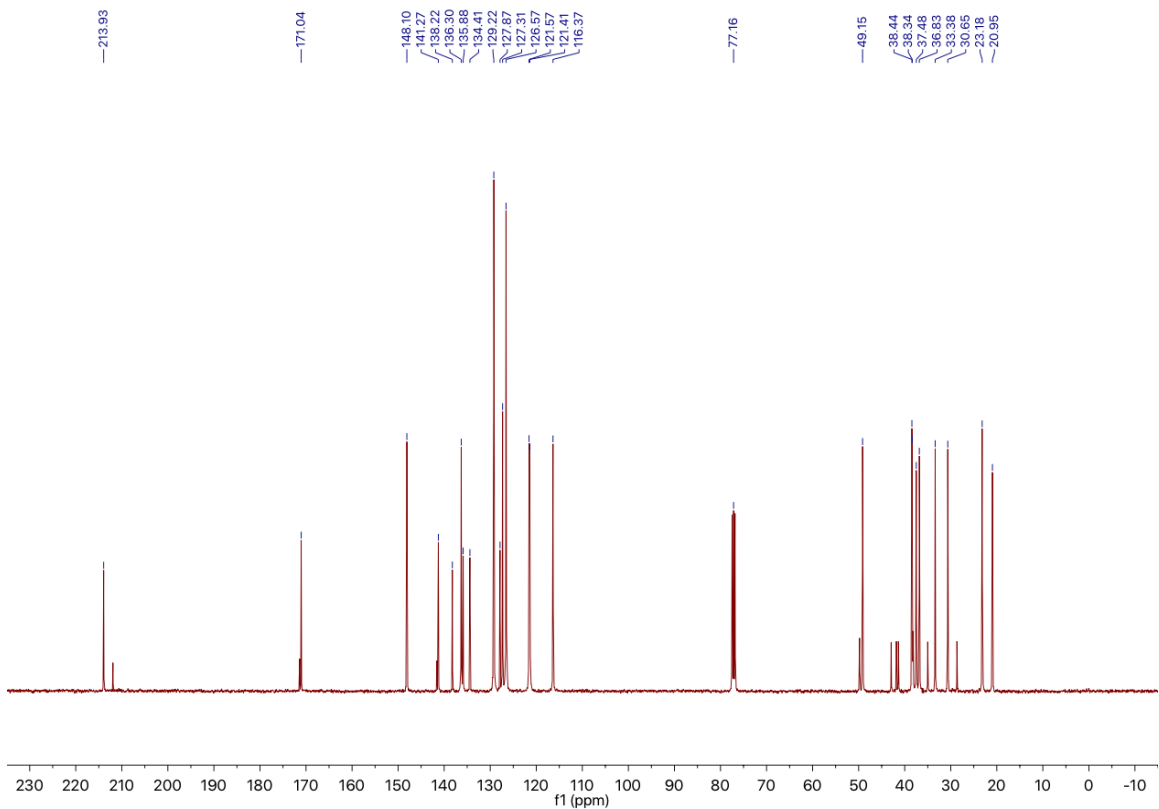

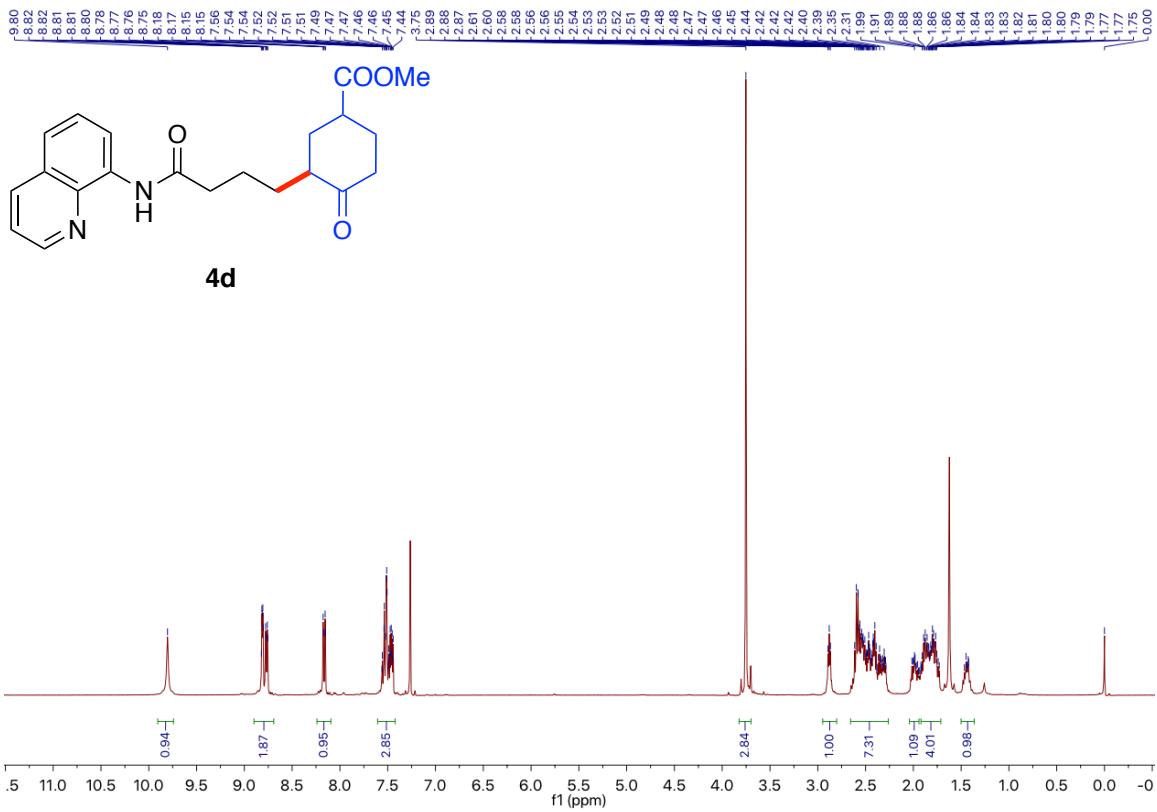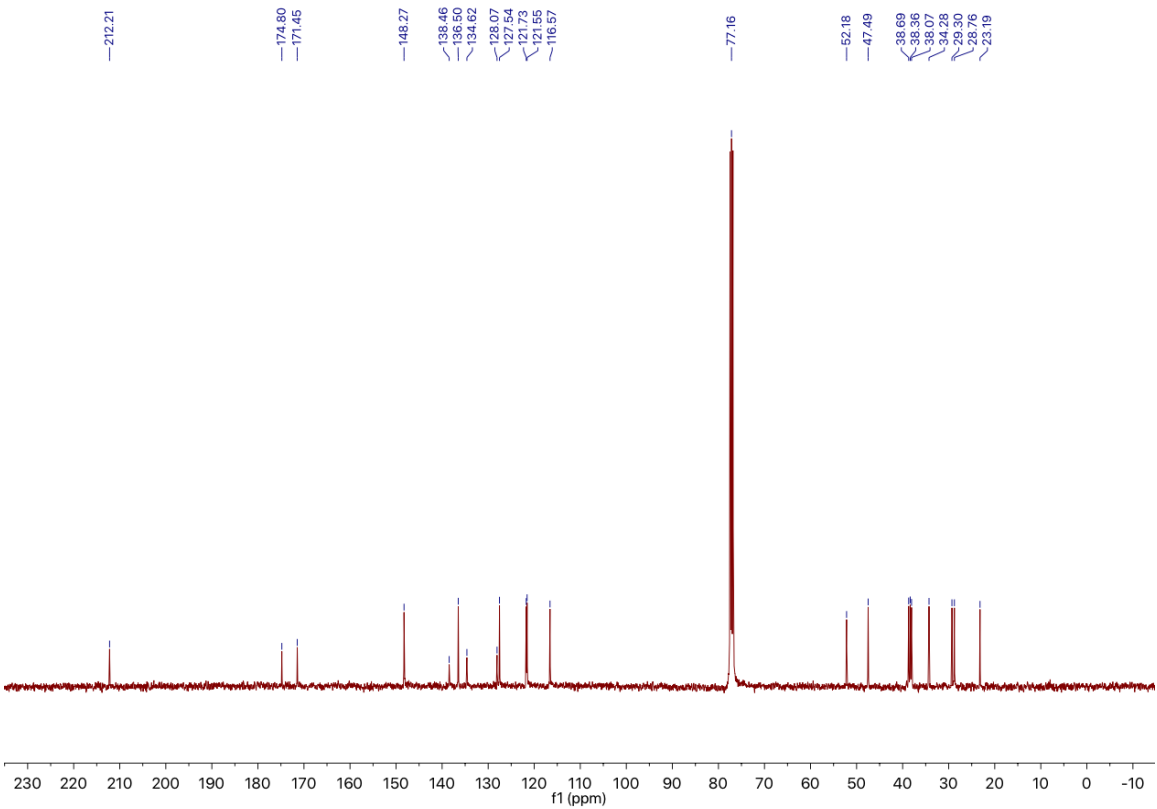

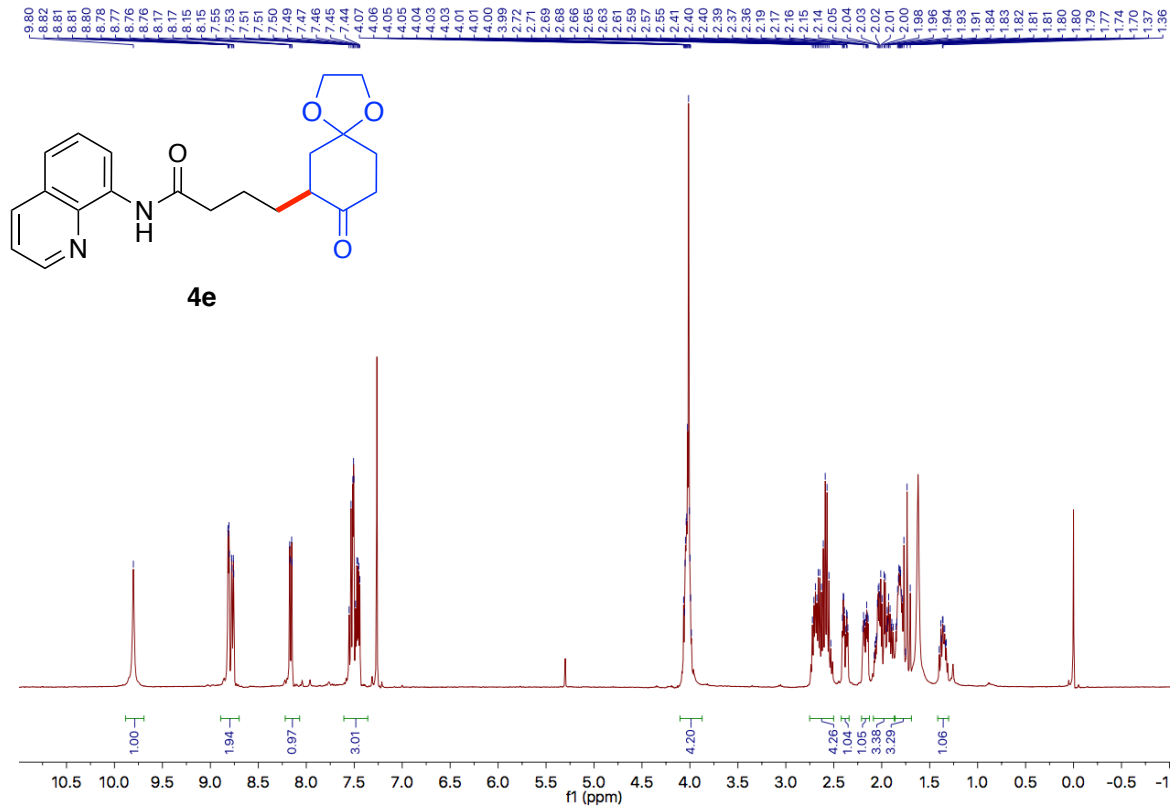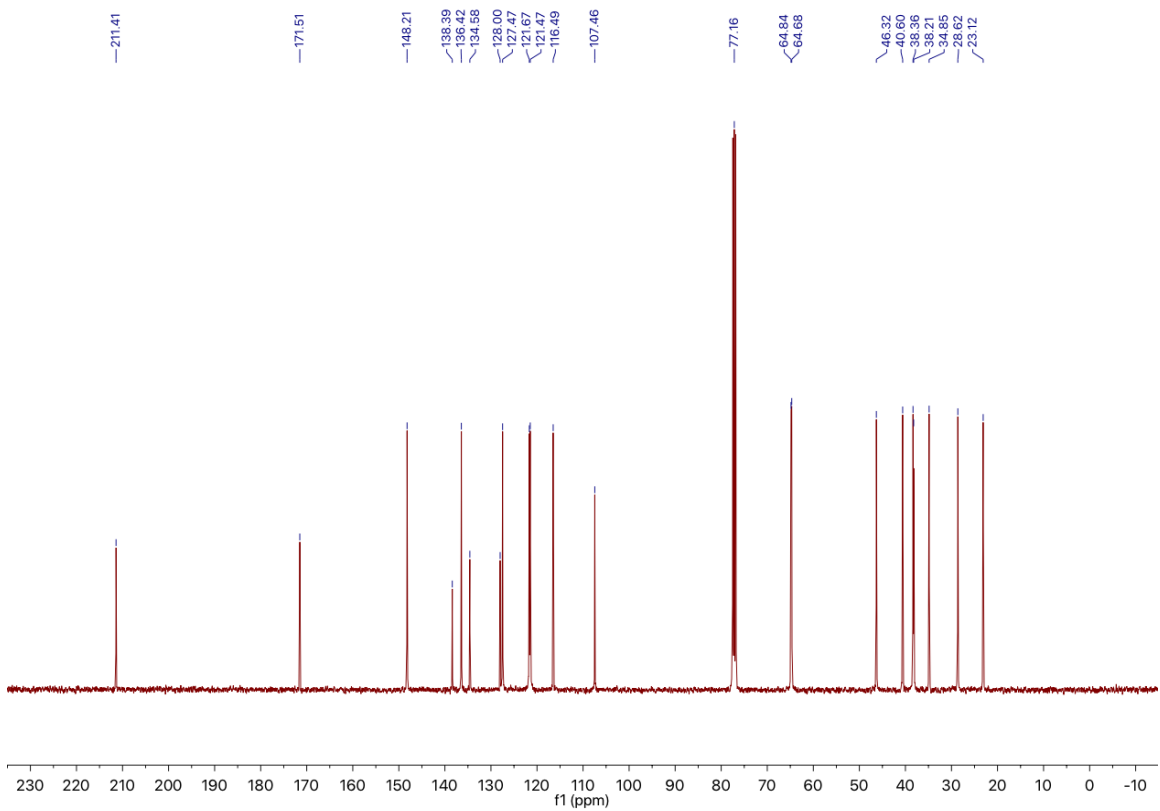

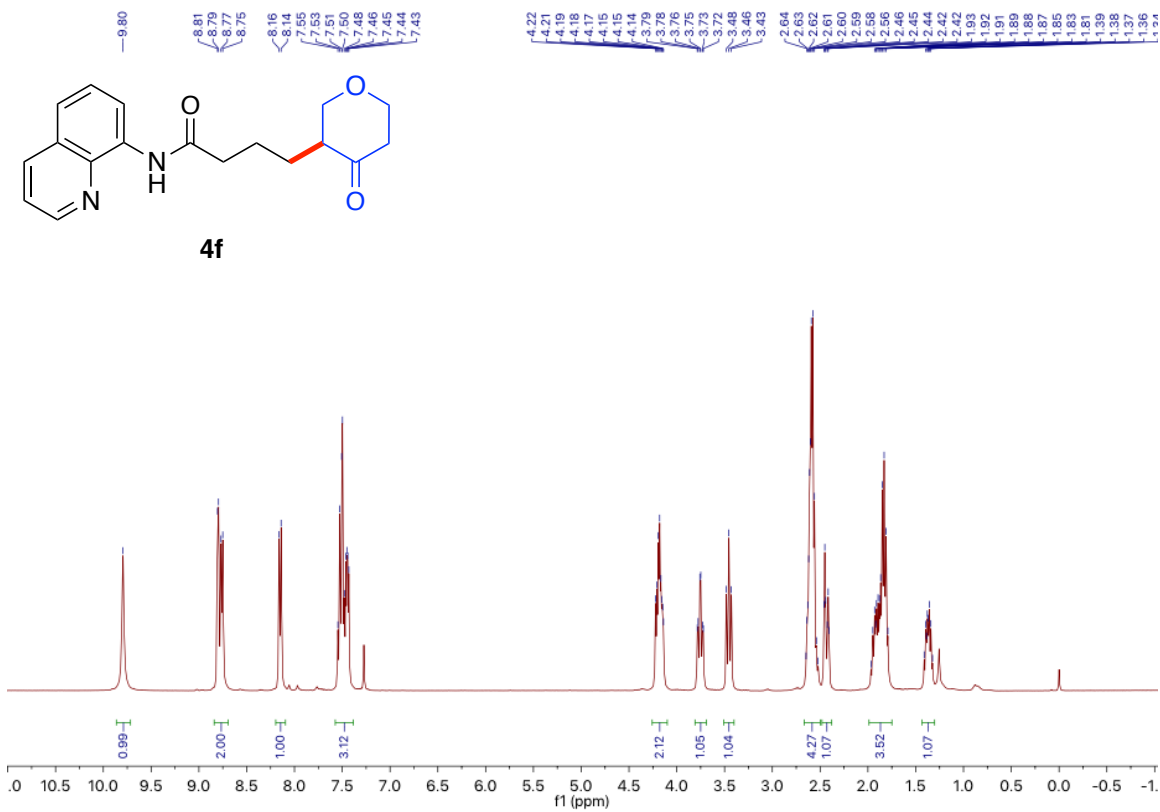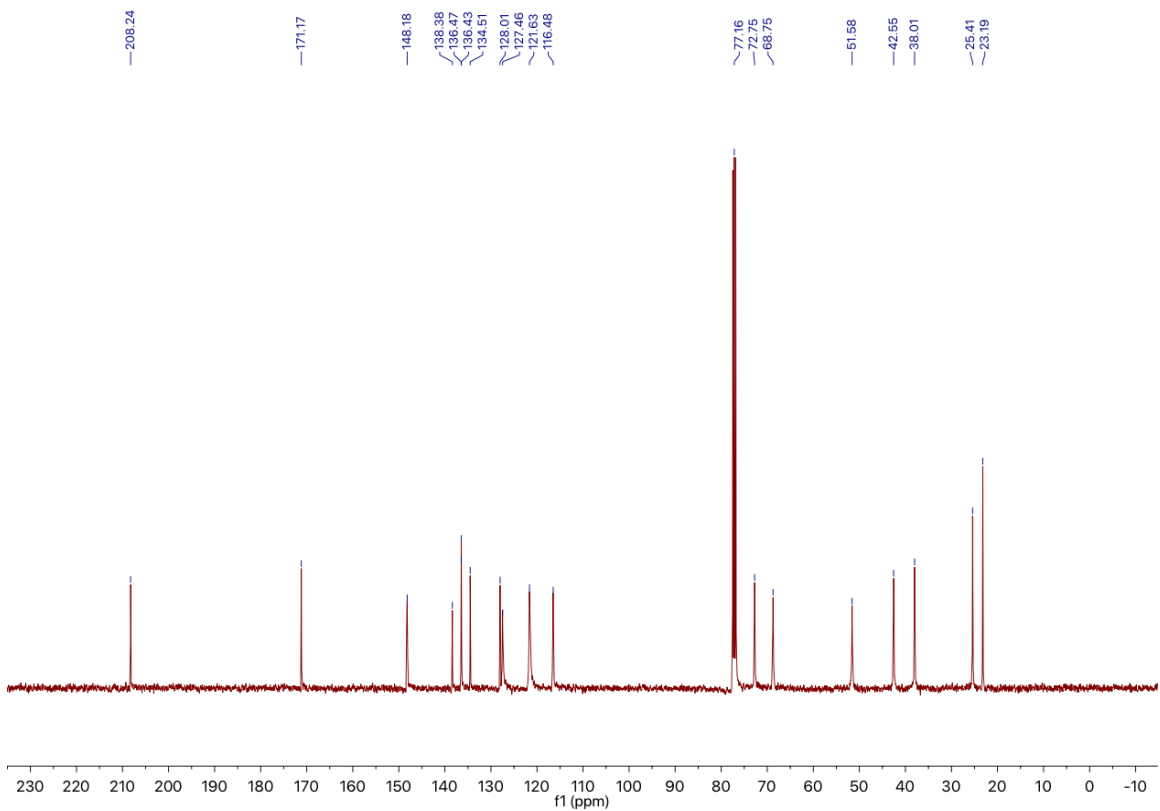

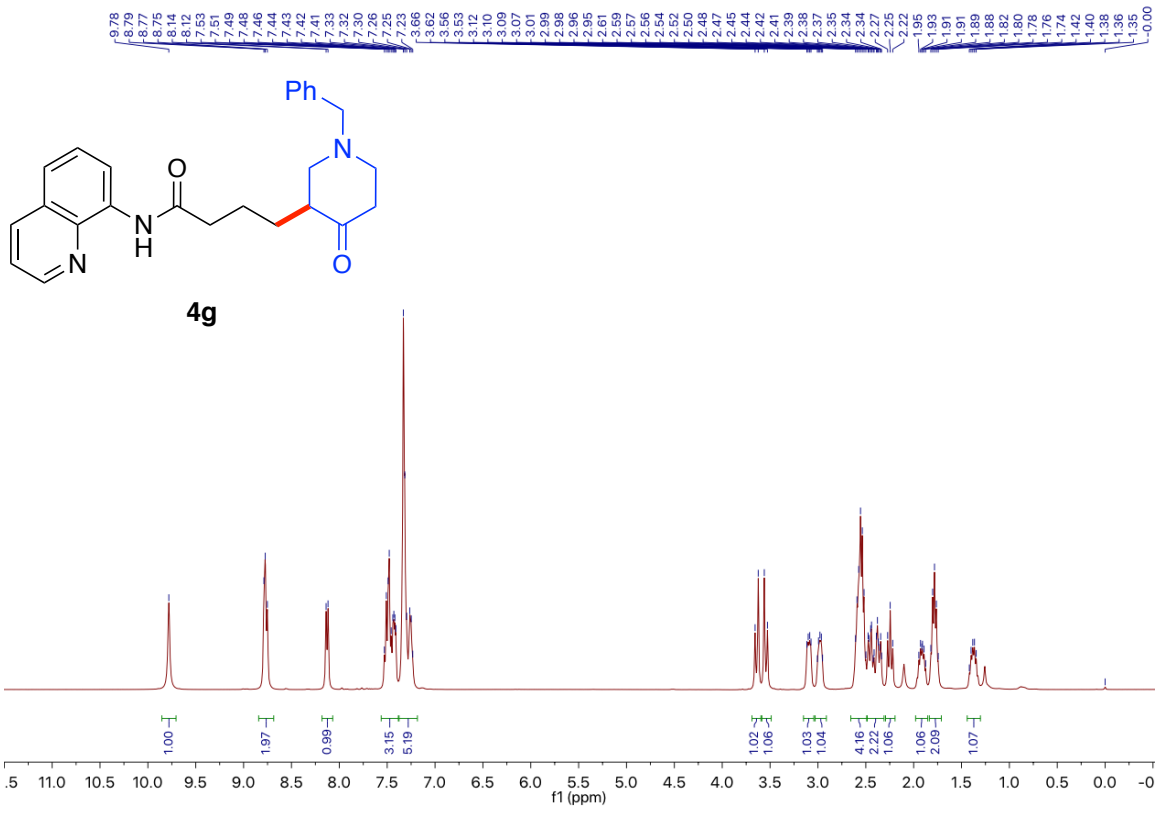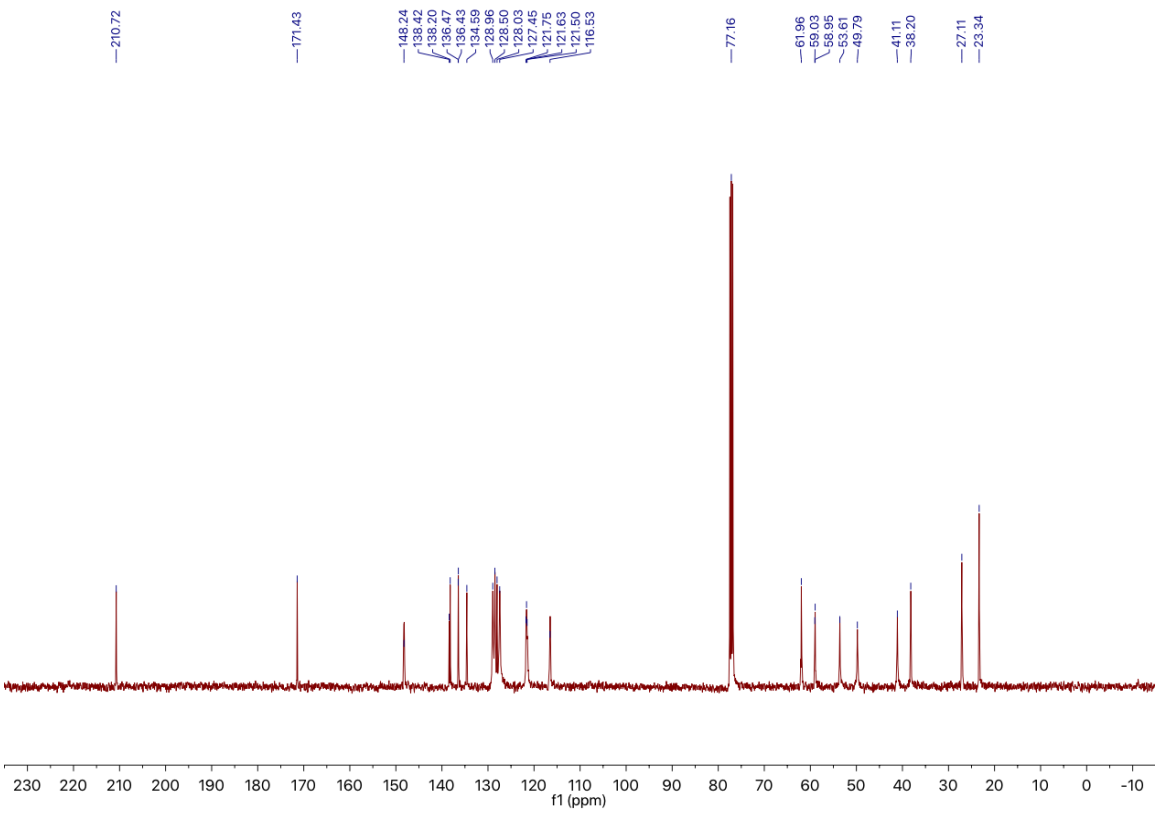

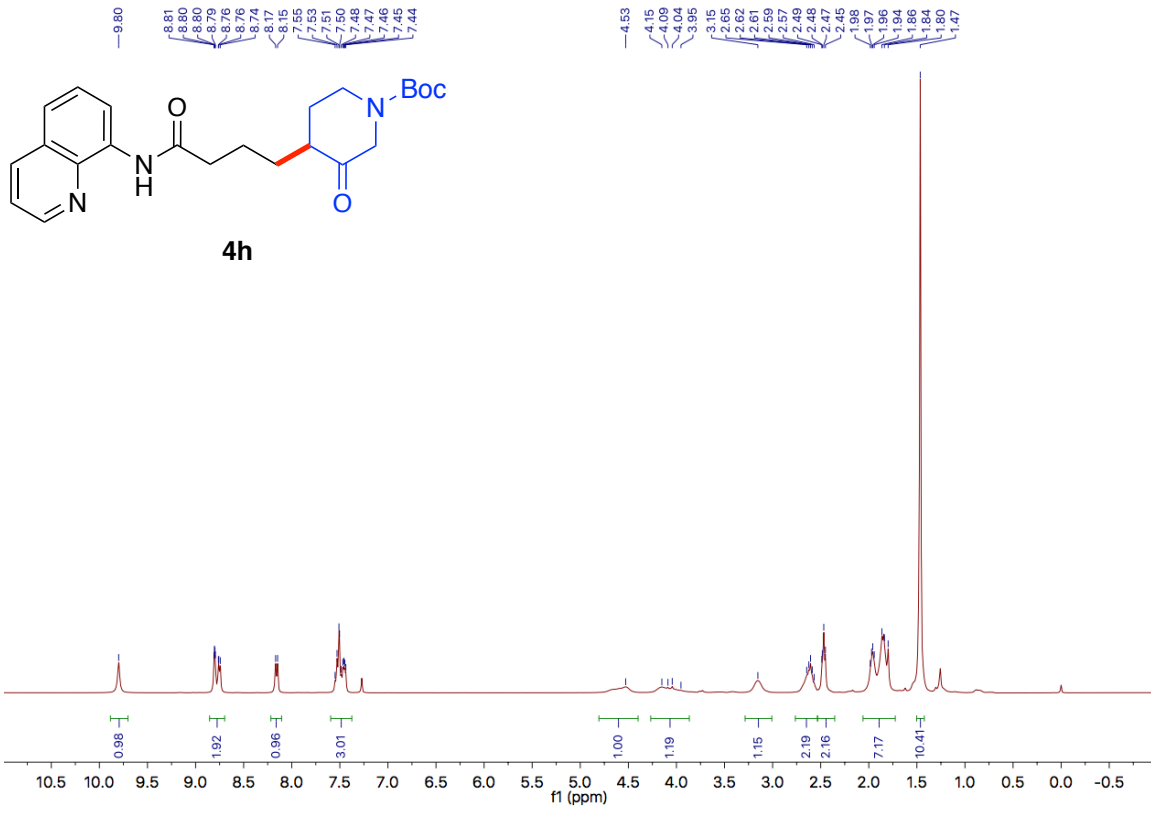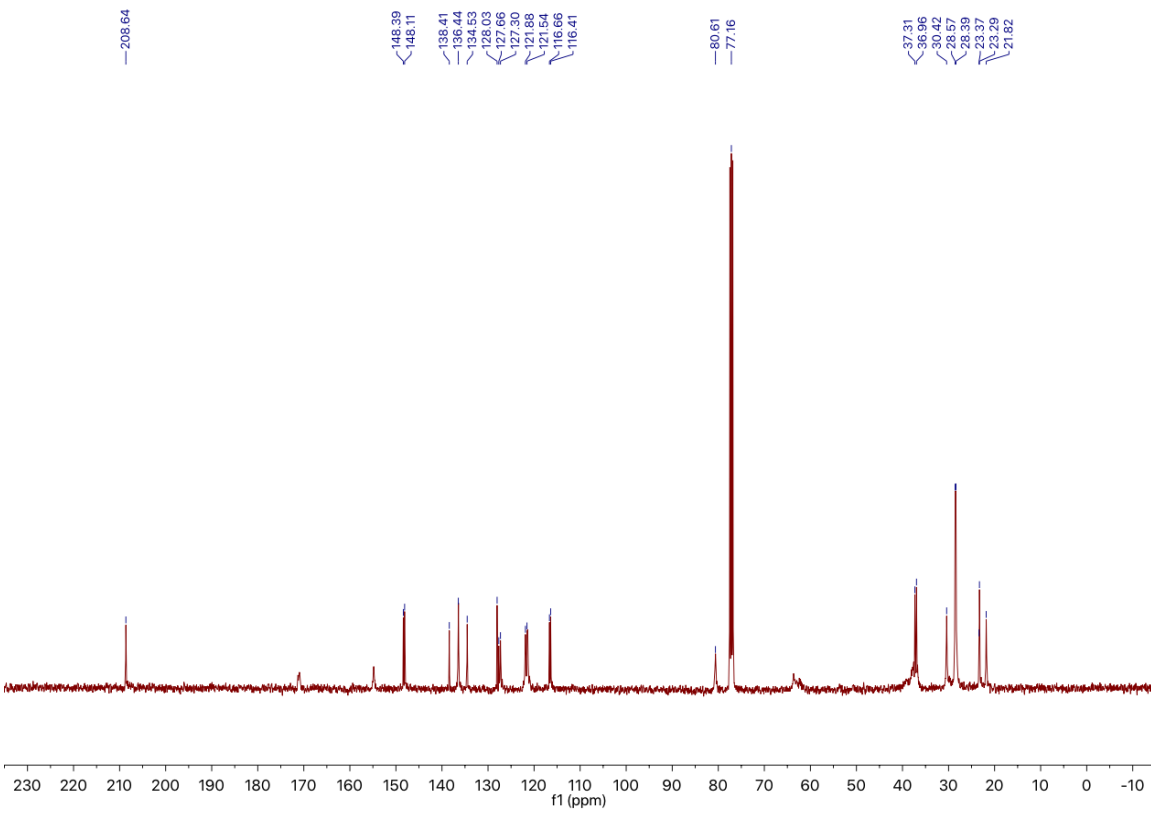

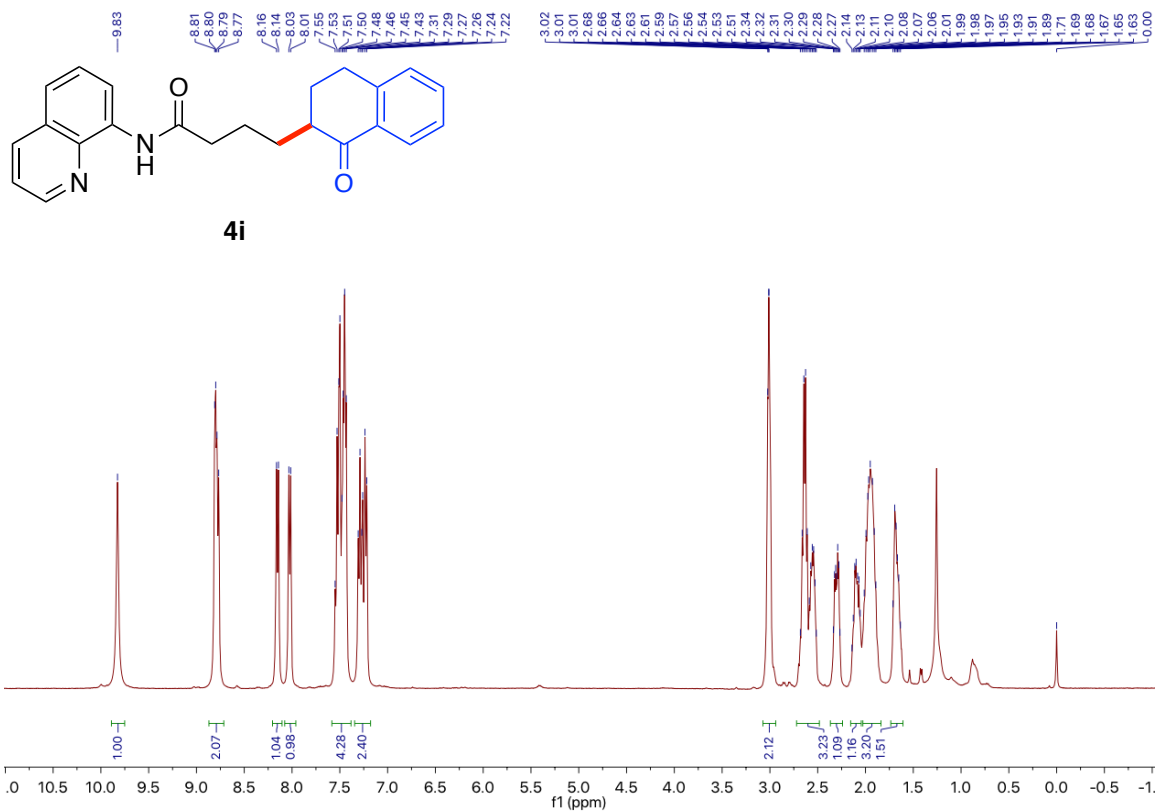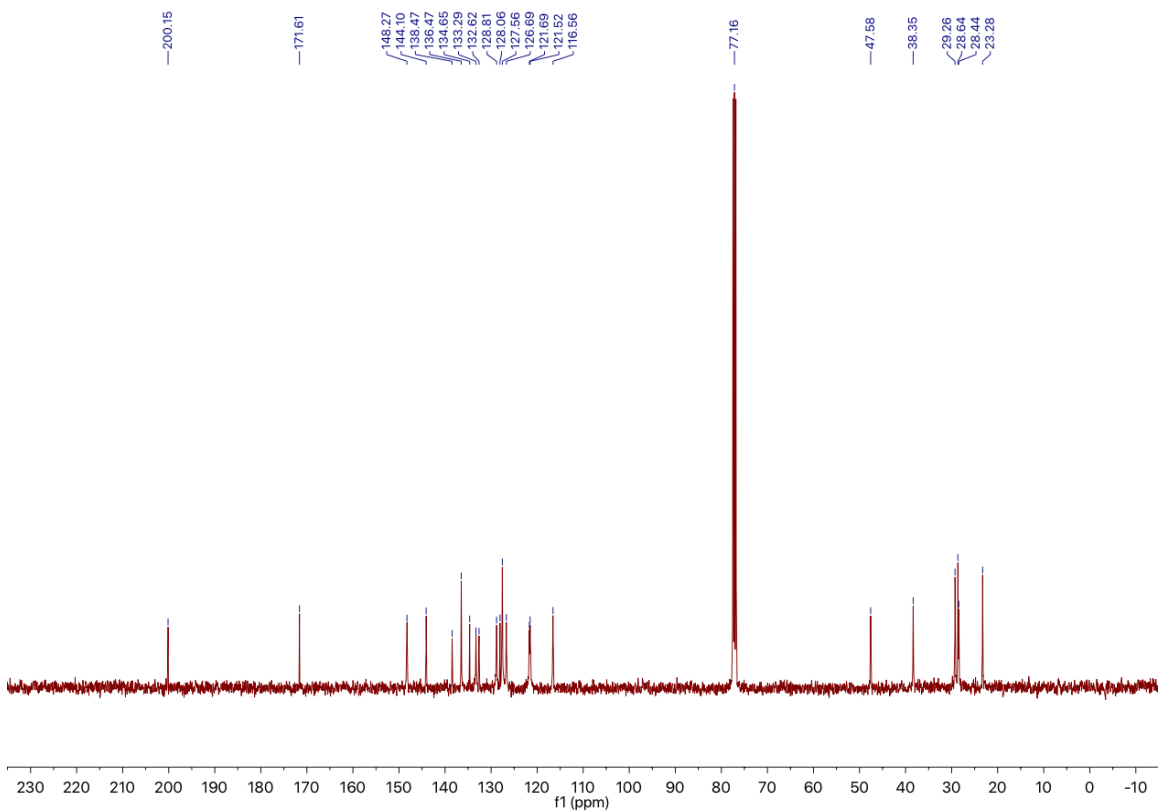

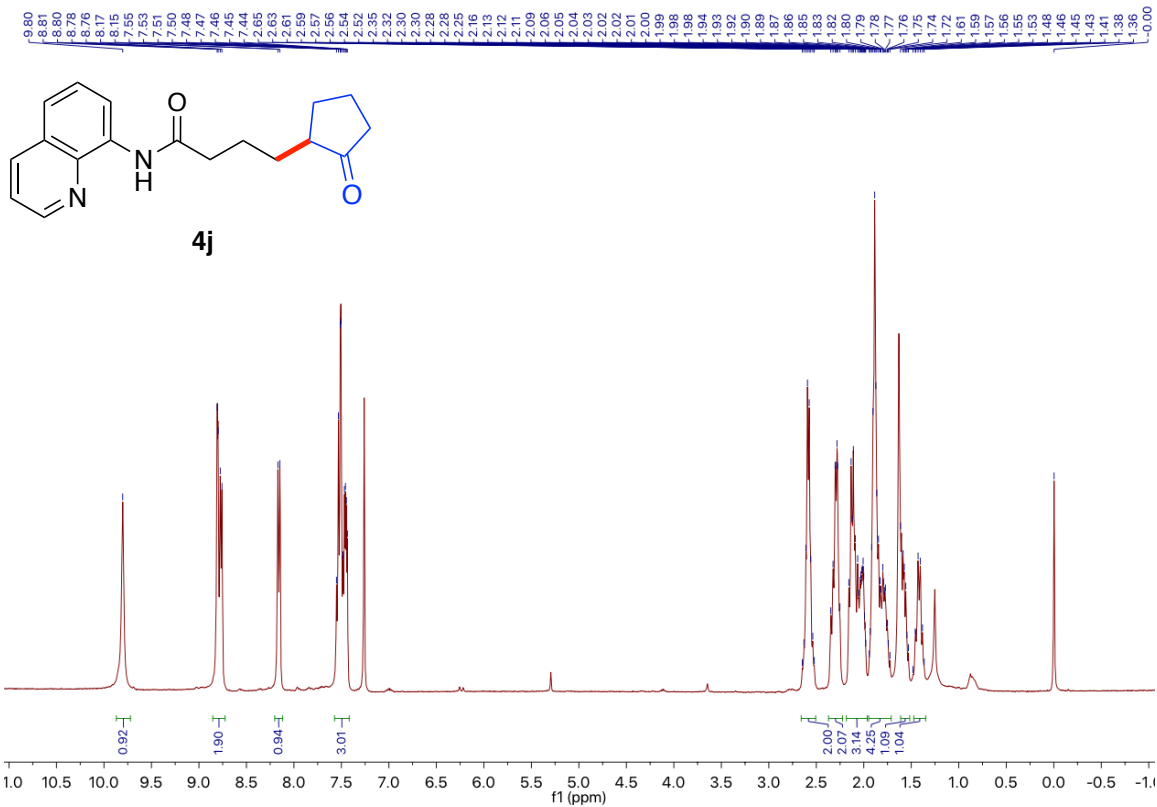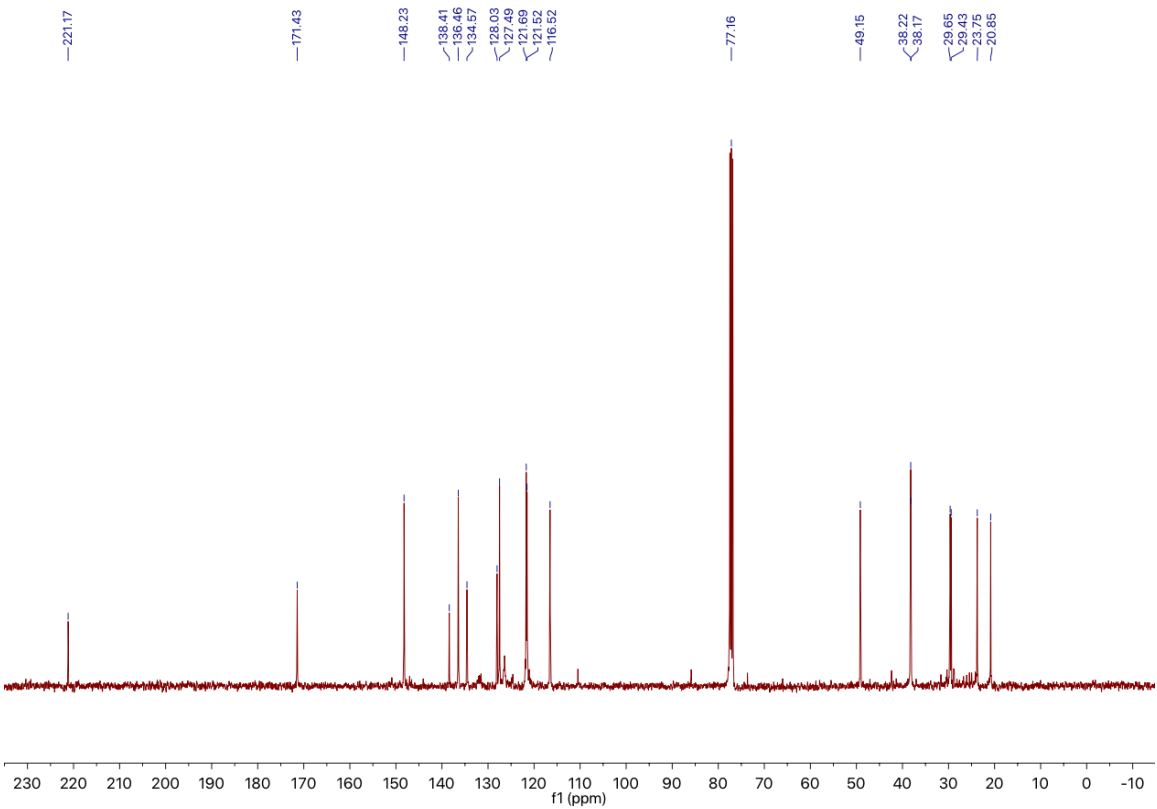



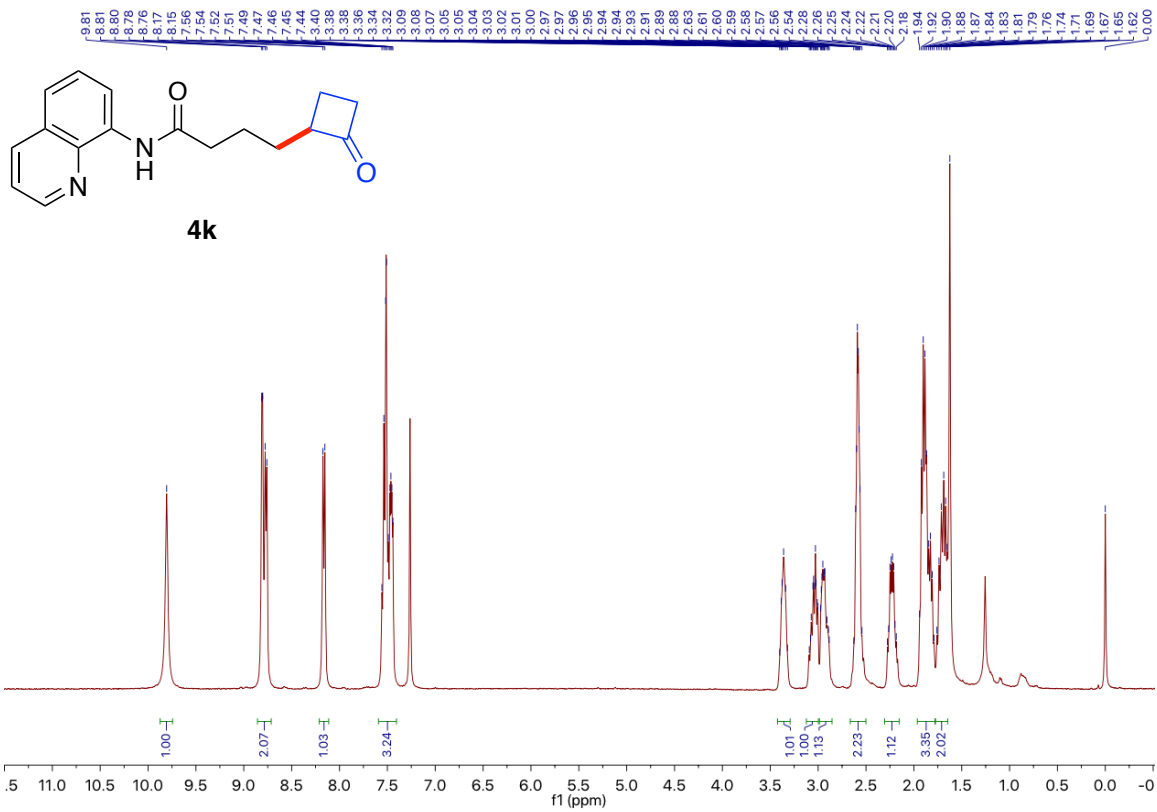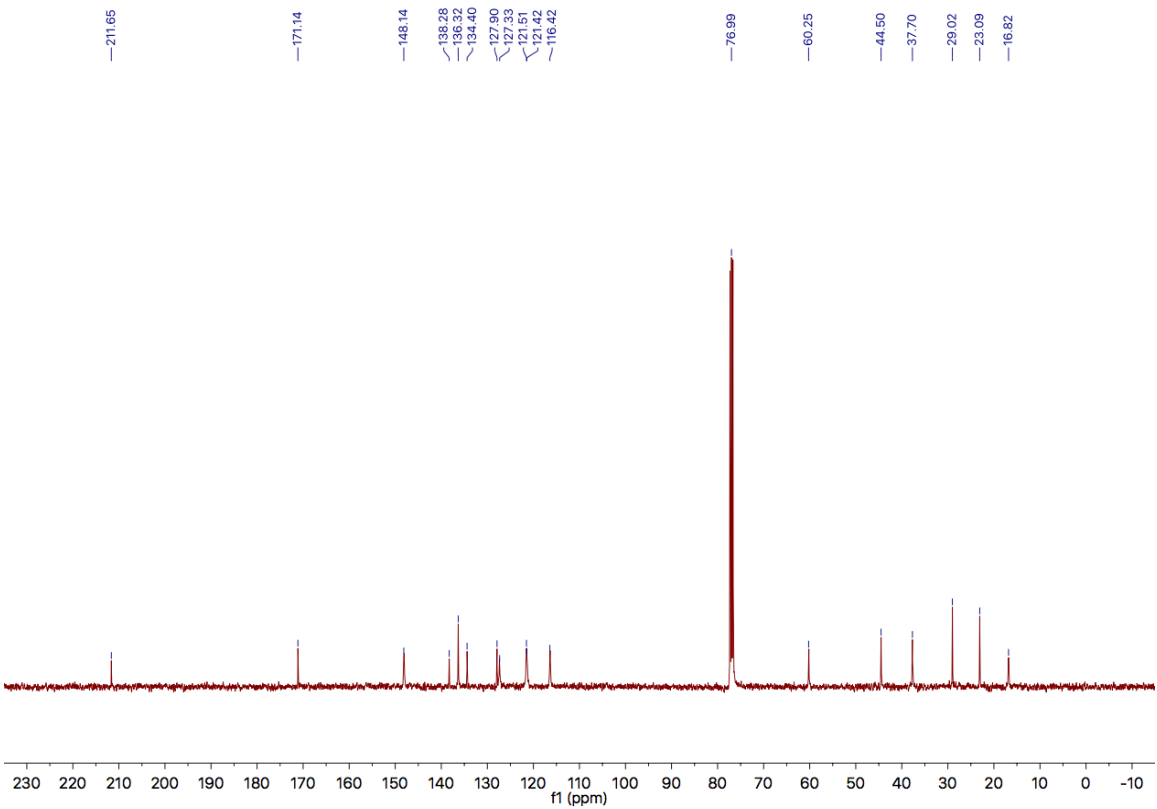

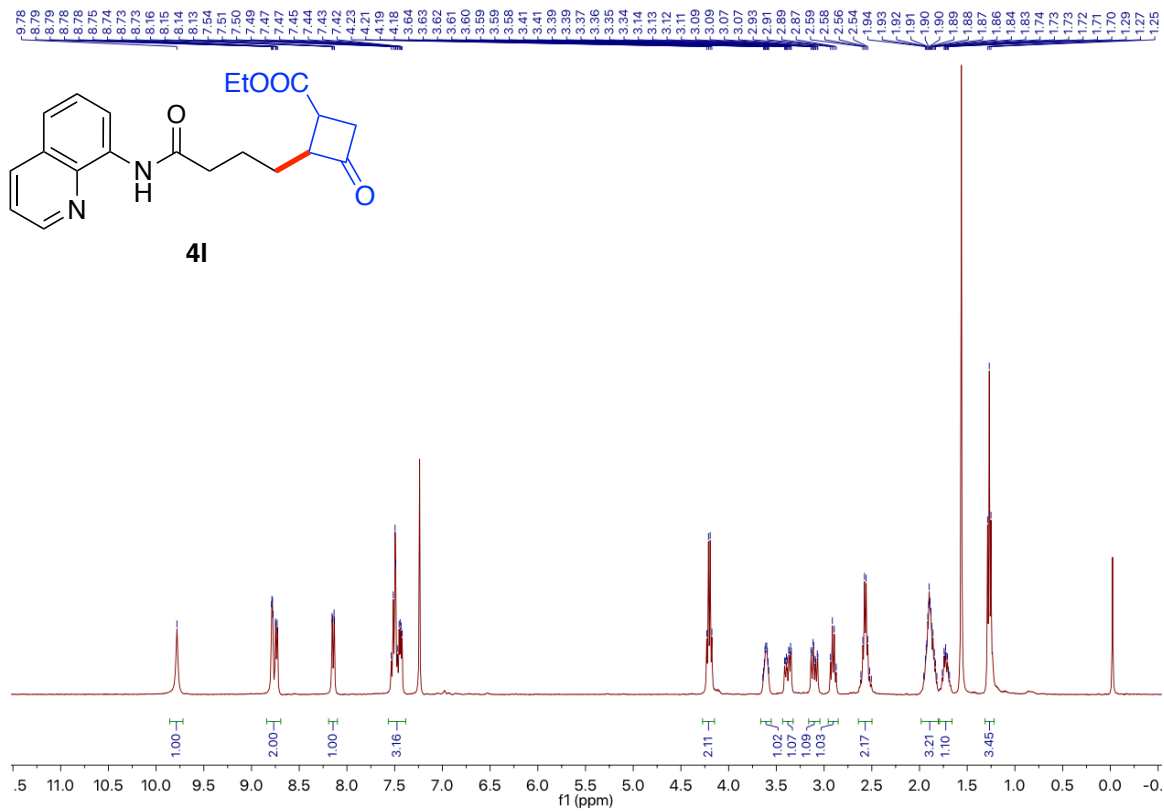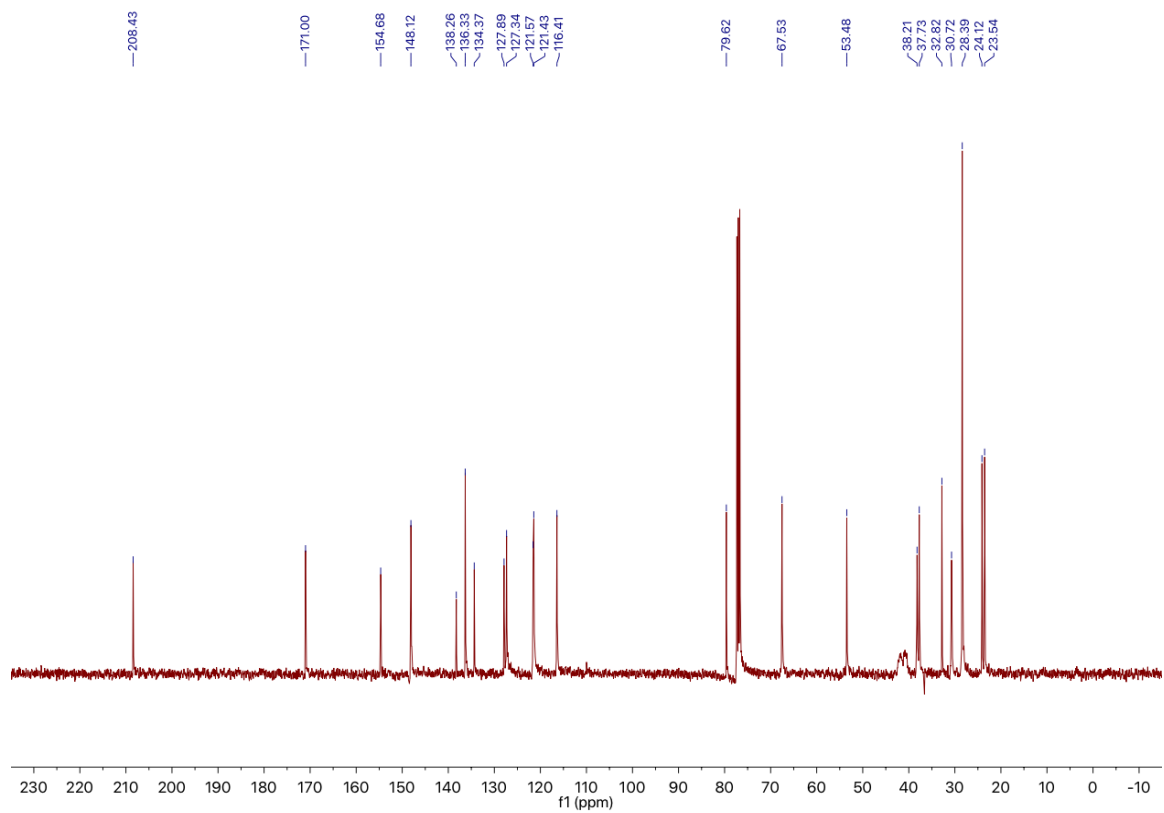

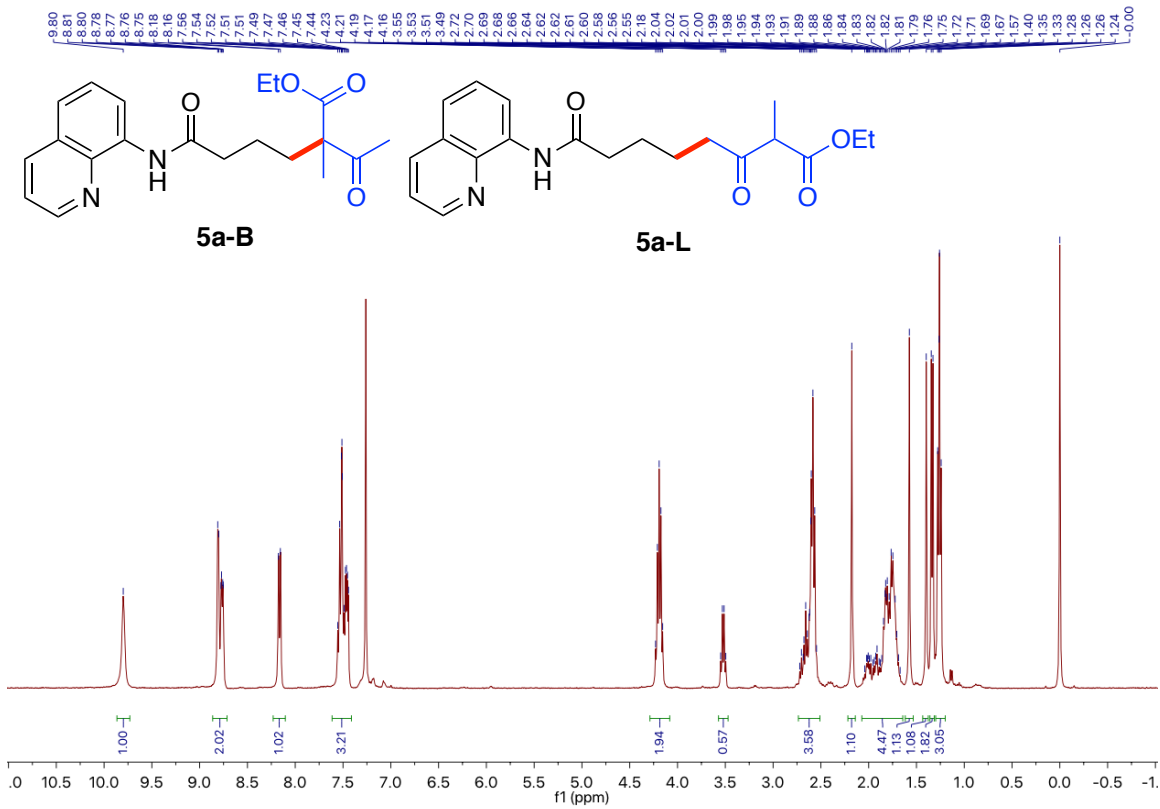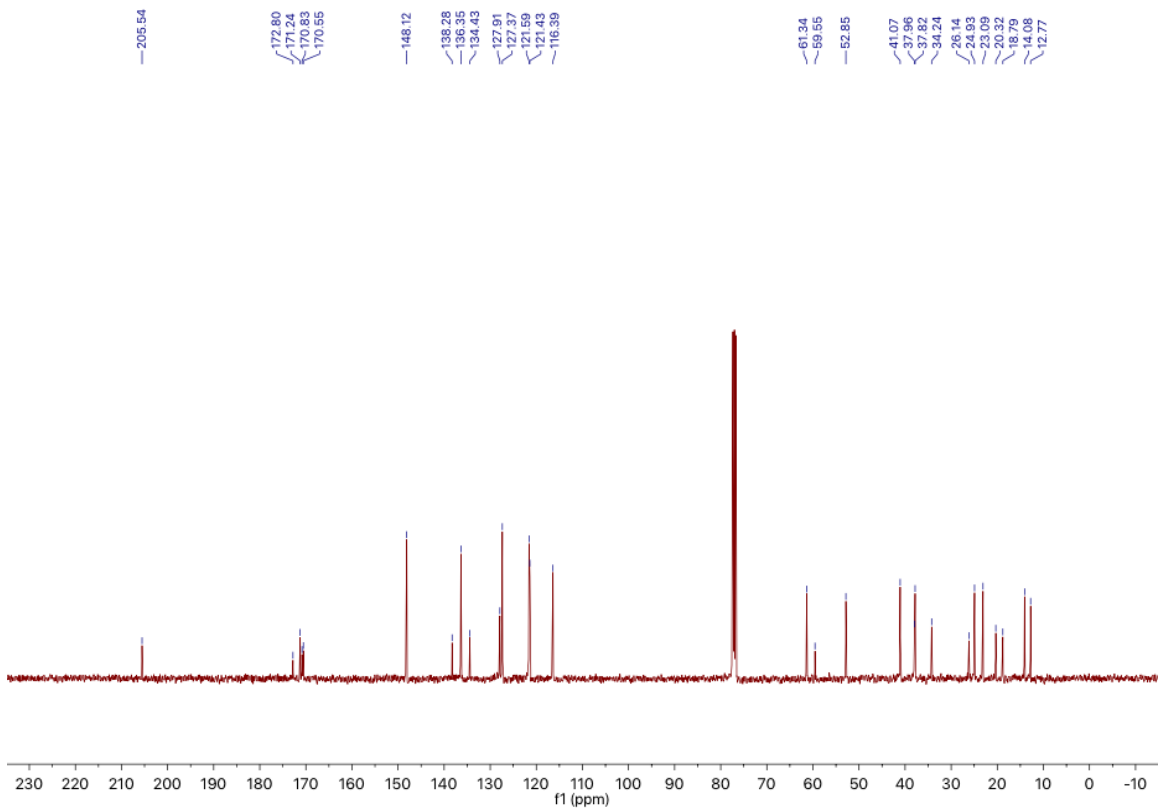

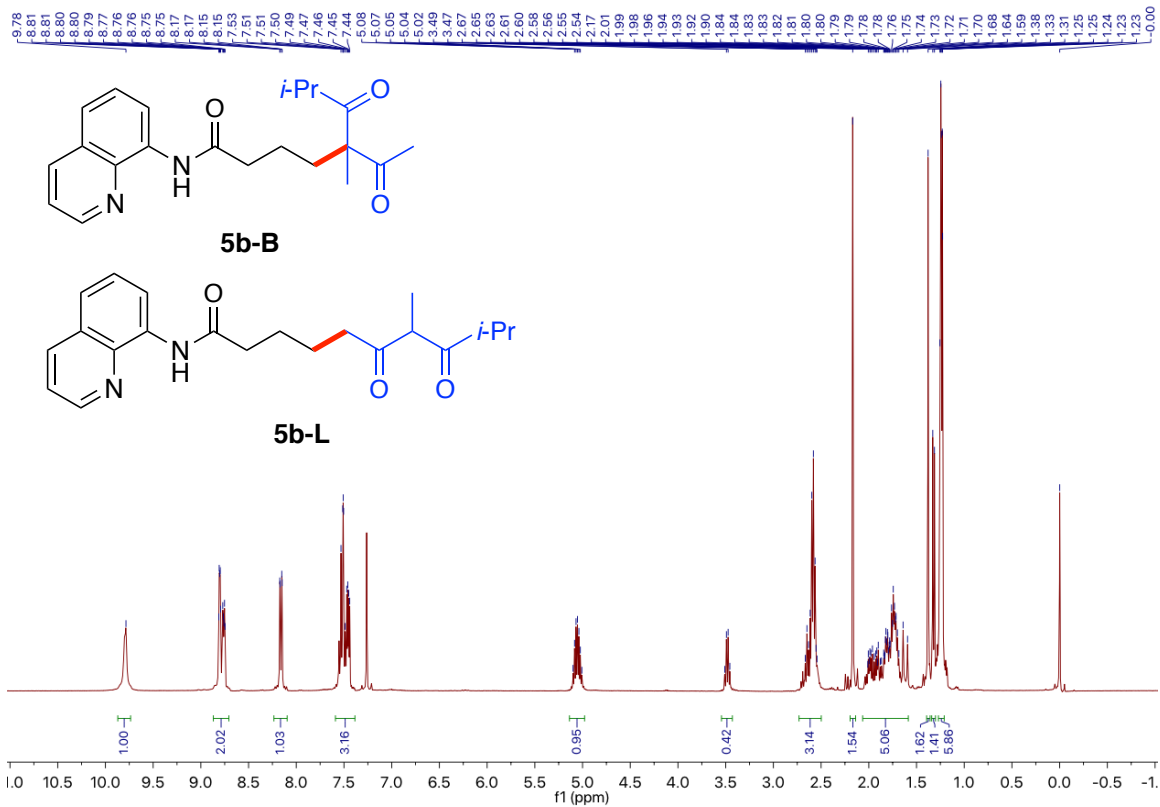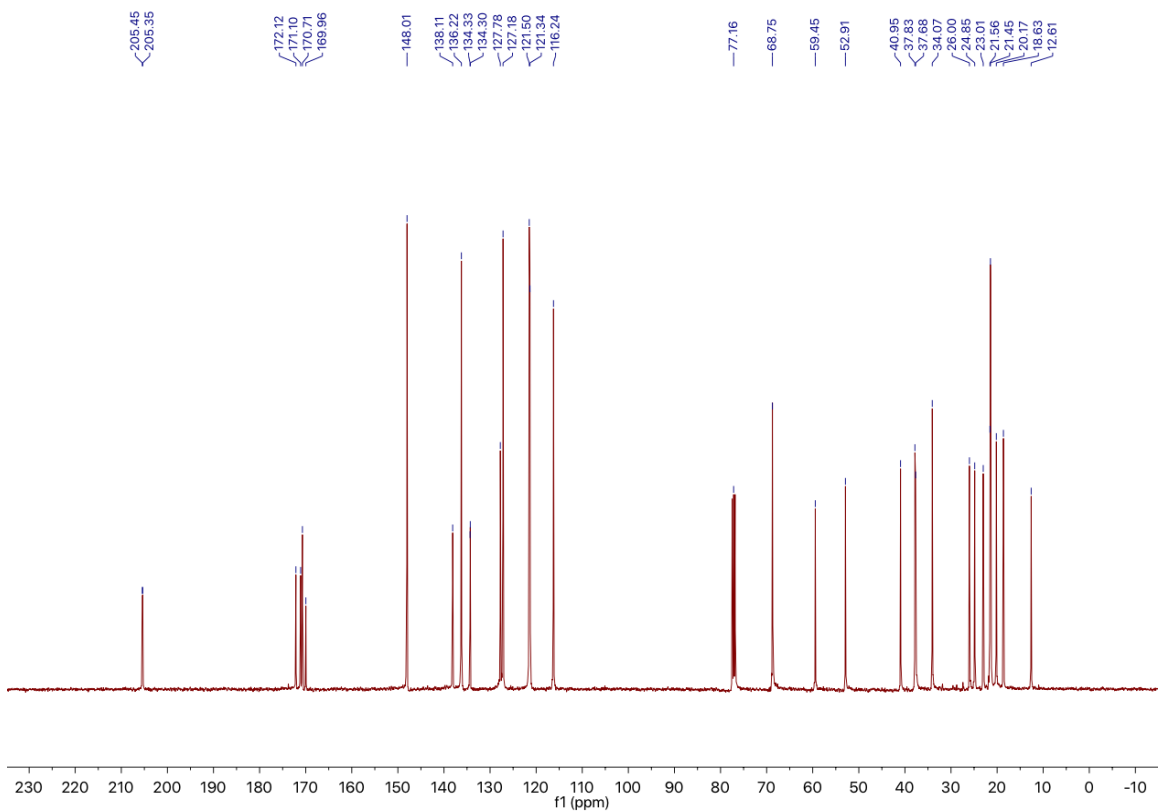

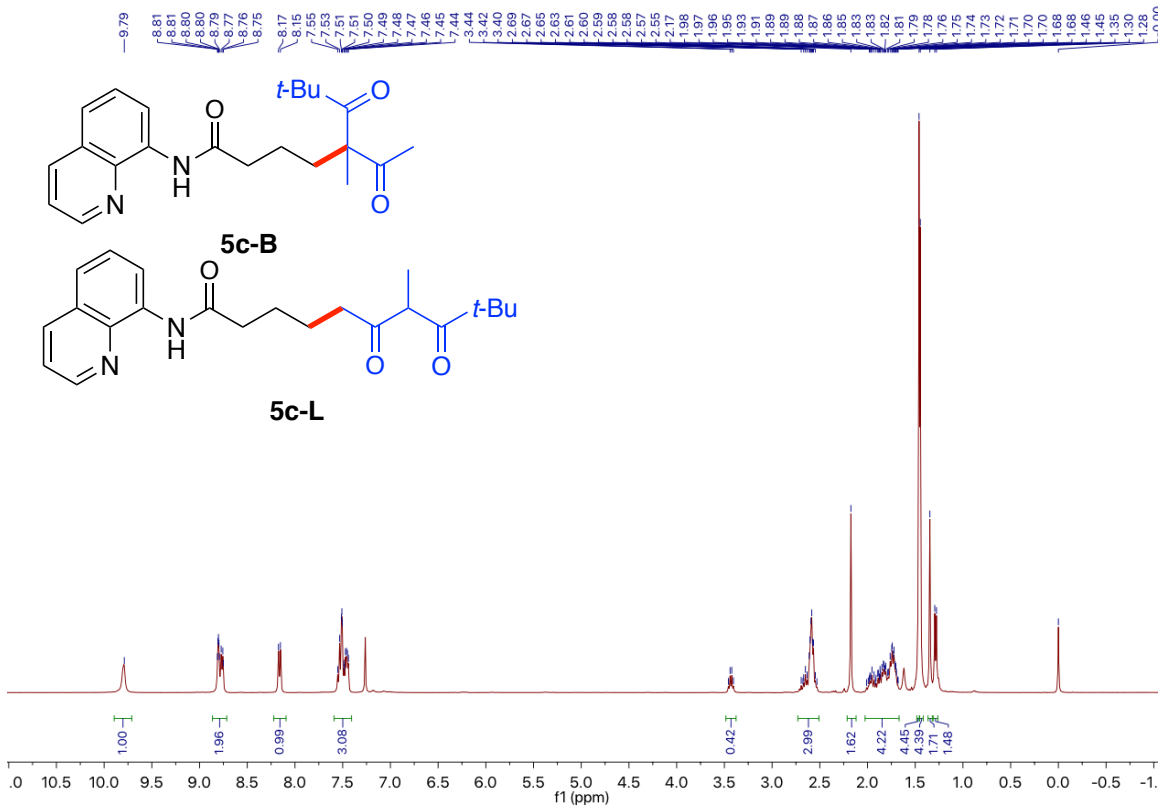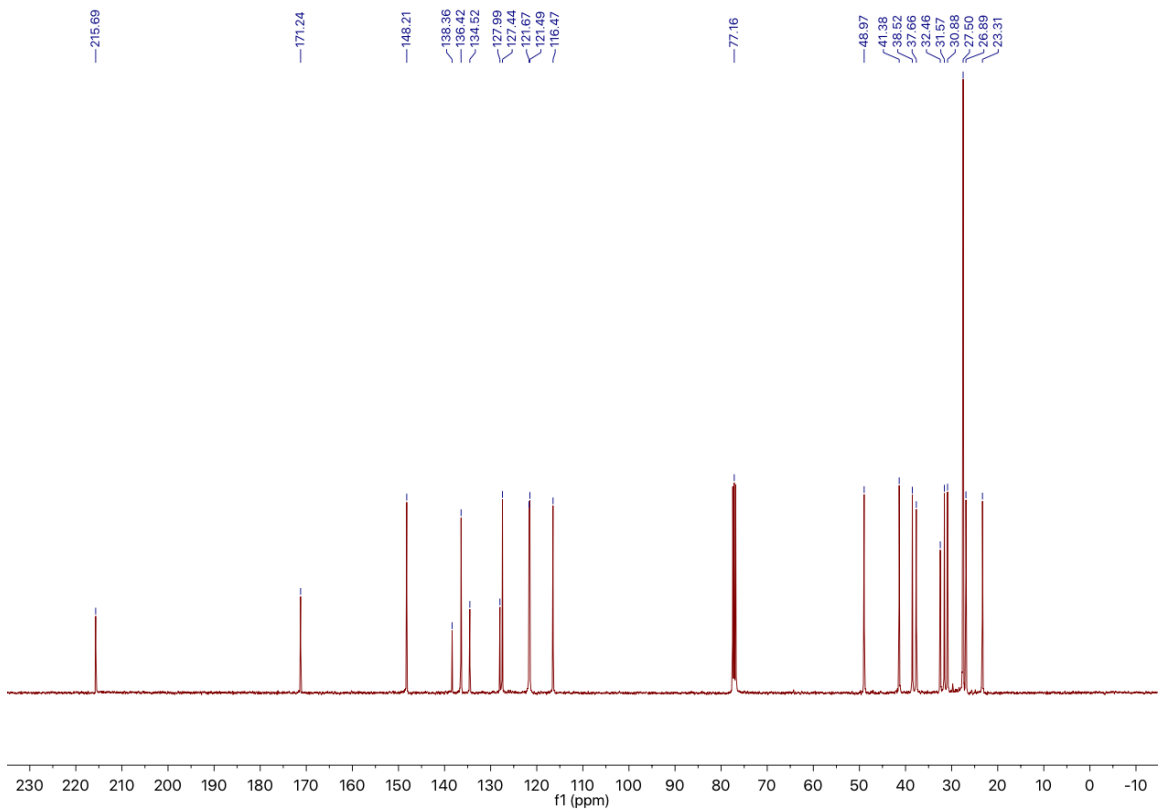

## V. HPLC Spectra for Products

4a

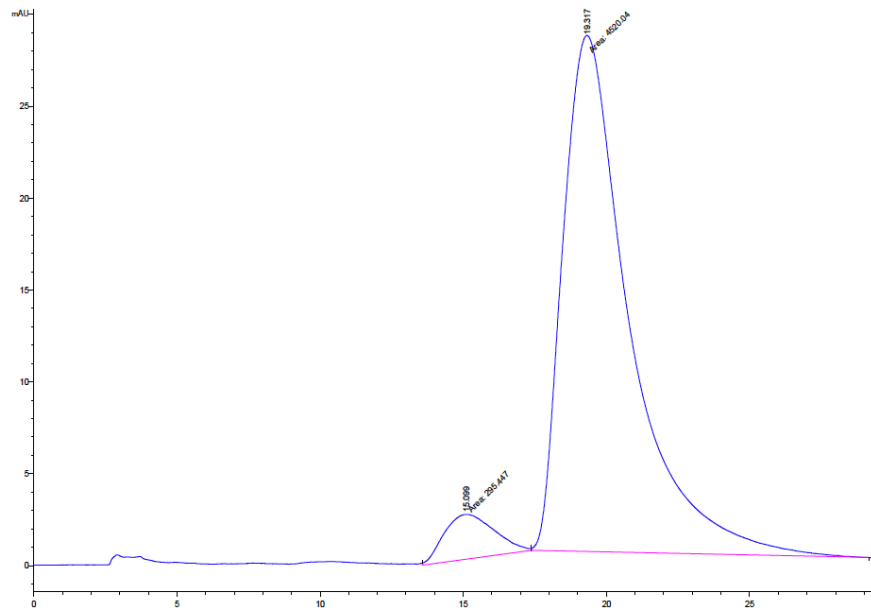

| Peak # | RetTime [min] | Type | Width [min] | Area [mAU*s] | Height [mAU] | Area %  |
|--------|---------------|------|-------------|--------------|--------------|---------|
| 1      | 15.099        | MM   | 2.0182      | 295.44681    | 2.43985      | 6.1354  |
| 2      | 19.317        | MM   | 2.6832      | 4520.03564   | 28.07619     | 93.8646 |

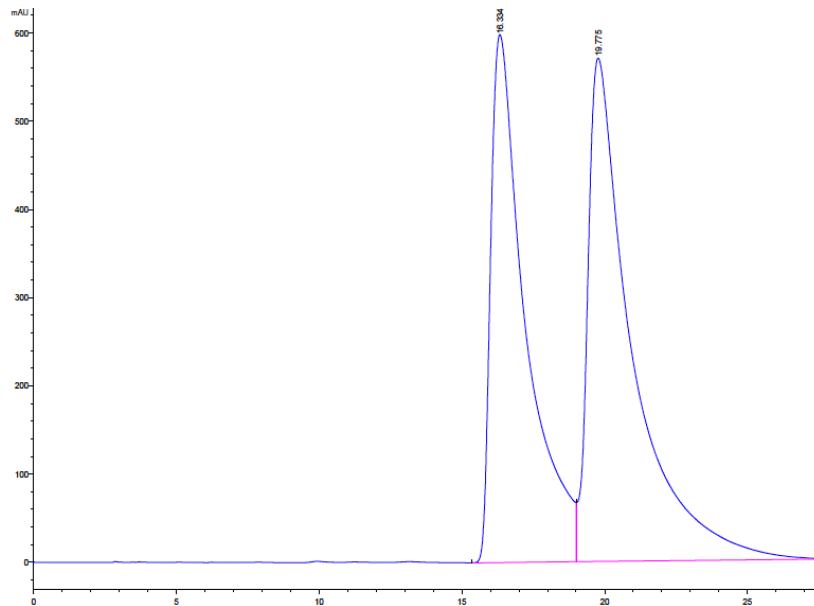

| Peak # | RetTime [min] | Type | Width [min] | Area [mAU*s] | Height [mAU] | Area %  |
|--------|---------------|------|-------------|--------------|--------------|---------|
| 1      | 16.334        | BV   | 1.2126      | 5.07116e4    | 598.45721    | 45.2385 |
| 2      | 19.775        | VBA  | 1.4951      | 6.13868e4    | 570.60626    | 54.7615 |

4b

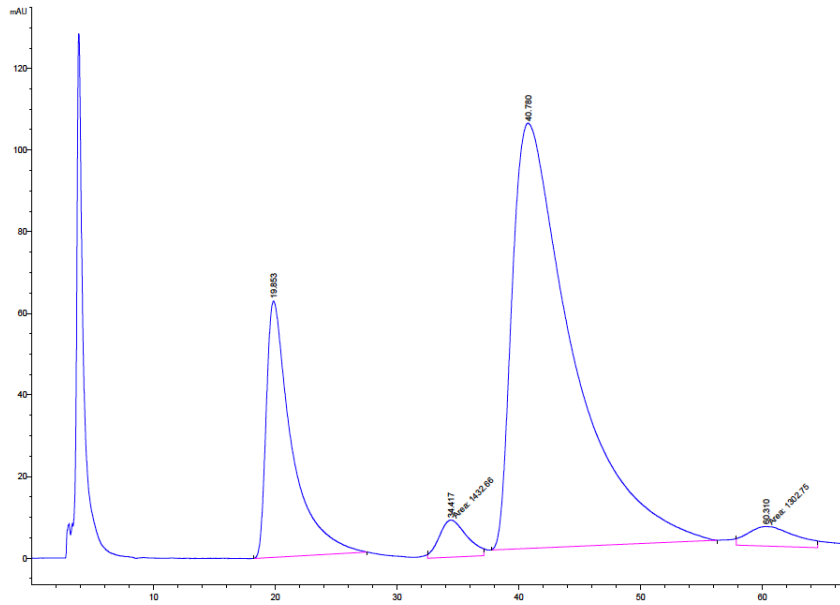

| Peak # | RetTime [min] | Type | Width [min] | Area [mAU*s] | Height [mAU] | Area %  |
|--------|---------------|------|-------------|--------------|--------------|---------|
| 1      | 19.853        | BB   | 1.9268      | 9143.08691   | 62.78939     | 19.2081 |
| 2      | 34.417        | MM   | 2.6245      | 1432.65552   | 9.09793      | 3.0098  |
| 3      | 40.780        | BB   | 4.0204      | 3.57216e4    | 104.17704    | 75.0452 |
| 4      | 60.310        | MM   | 4.5405      | 1302.74634   | 4.78200      | 2.7369  |

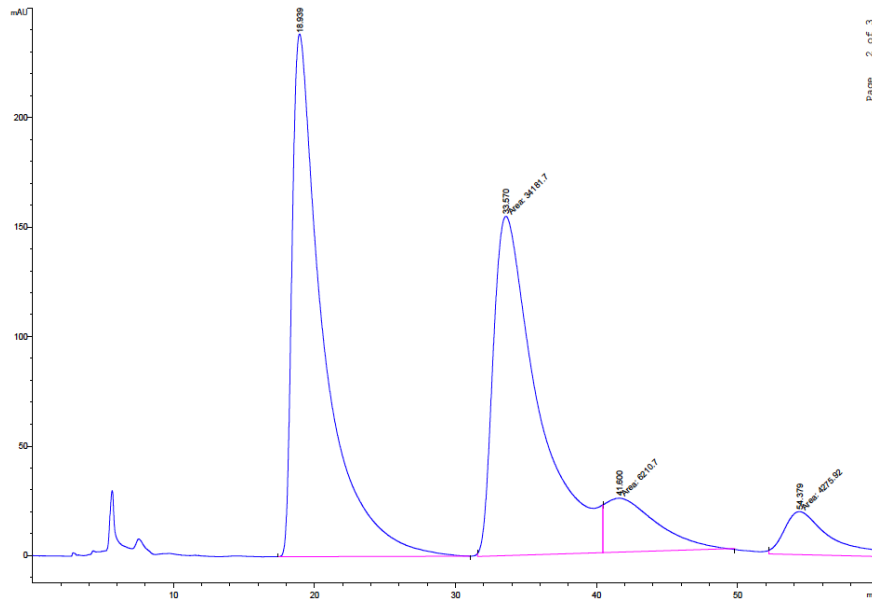

| Peak # | RetTime [min] | Type | Width [min] | Area [mAU*s] | Height [mAU] | Area %  |
|--------|---------------|------|-------------|--------------|--------------|---------|
| 1      | 18.939        | BB   | 2.1181      | 3.67376e4    | 238.62573    | 45.1289 |
| 2      | 33.570        | MF   | 3.6768      | 3.41817e4    | 154.94432    | 41.9892 |
| 3      | 41.600        | FM   | 4.2137      | 6210.69824   | 24.56542     | 7.6293  |
| 4      | 54.379        | MM   | 3.6251      | 4275.92139   | 19.65880     | 5.2526  |

Page 2 of 3

4c

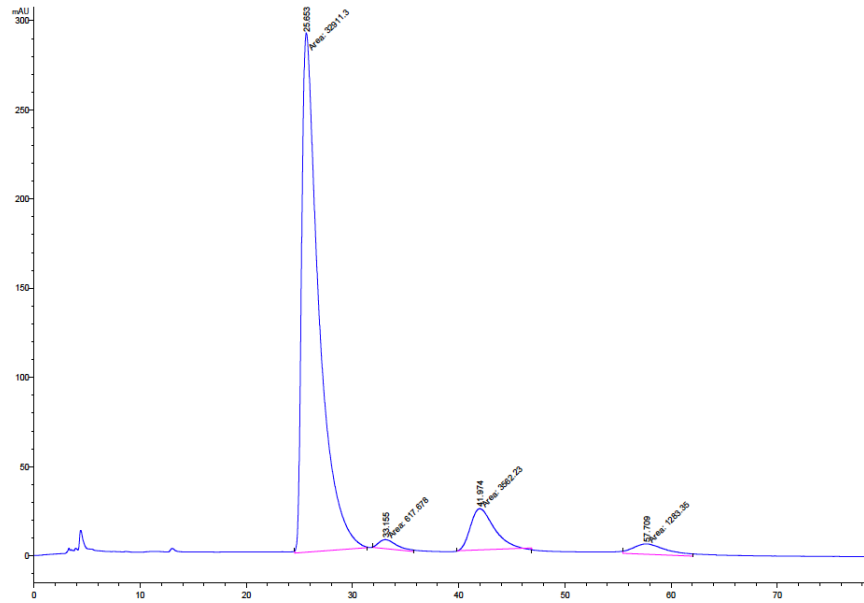

| Peak # | RetTime [min] | Type | Width [min] | Area [mAU*s] | Height [mAU] | Area %  |
|--------|---------------|------|-------------|--------------|--------------|---------|
| 1      | 25.653        | MM   | 1.8849      | 3.29113e4    | 291.01071    | 85.7633 |
| 2      | 33.155        | MM   | 1.9911      | 617.67767    | 5.17026      | 1.6096  |
| 3      | 41.974        | MM   | 2.5722      | 3562.23413   | 23.08173     | 9.2828  |
| 4      | 57.709        | MM   | 3.6836      | 1283.35498   | 5.80666      | 3.3443  |

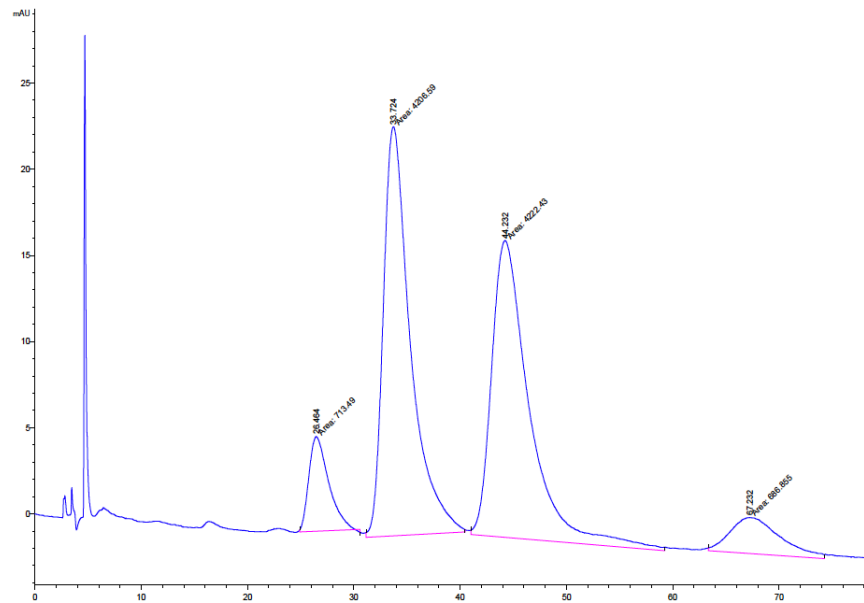

| Peak # | RetTime [min] | Type | Width [min] | Area [mAU*s] | Height [mAU] | Area %  |
|--------|---------------|------|-------------|--------------|--------------|---------|
| 1      | 26.464        | MM   | 2.1690      | 713.48975    | 5.48249      | 7.2588  |
| 2      | 33.724        | MM   | 2.9541      | 4206.59375   | 23.73303     | 42.7962 |
| 3      | 44.232        | MM   | 4.0851      | 4222.42822   | 17.22681     | 42.9573 |
| 4      | 67.232        | MM   | 5.5084      | 686.85498    | 2.07821      | 6.9878  |



4d

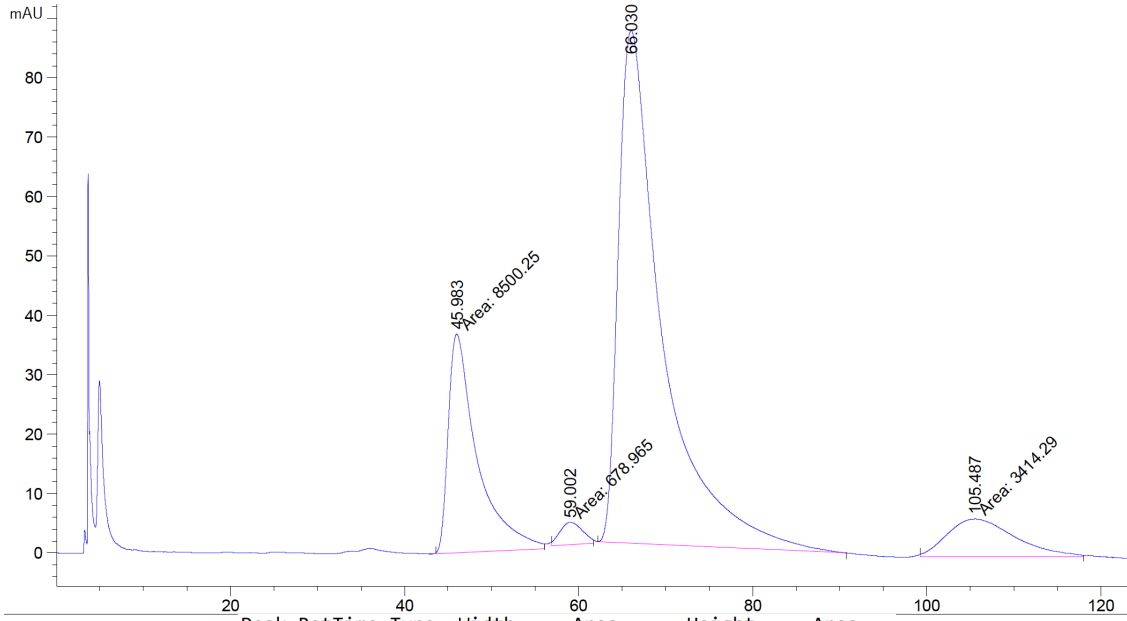

| Peak # | RetTime [min] | Type | Width [min] | Area [mAU*s] | Height [mAU] | Area %  |
|--------|---------------|------|-------------|--------------|--------------|---------|
| 1      | 45.983        | MM   | 3.8450      | 8500.24902   | 36.84522     | 19.8117 |
| 2      | 59.002        | MM   | 3.0006      | 678.96515    | 3.77122      | 1.5825  |
| 3      | 66.030        | BB   | 4.1124      | 3.03118e4    | 86.28606     | 70.6481 |
| 4      | 105.487       | MM   | 8.9702      | 3414.28979   | 6.34379      | 7.9577  |

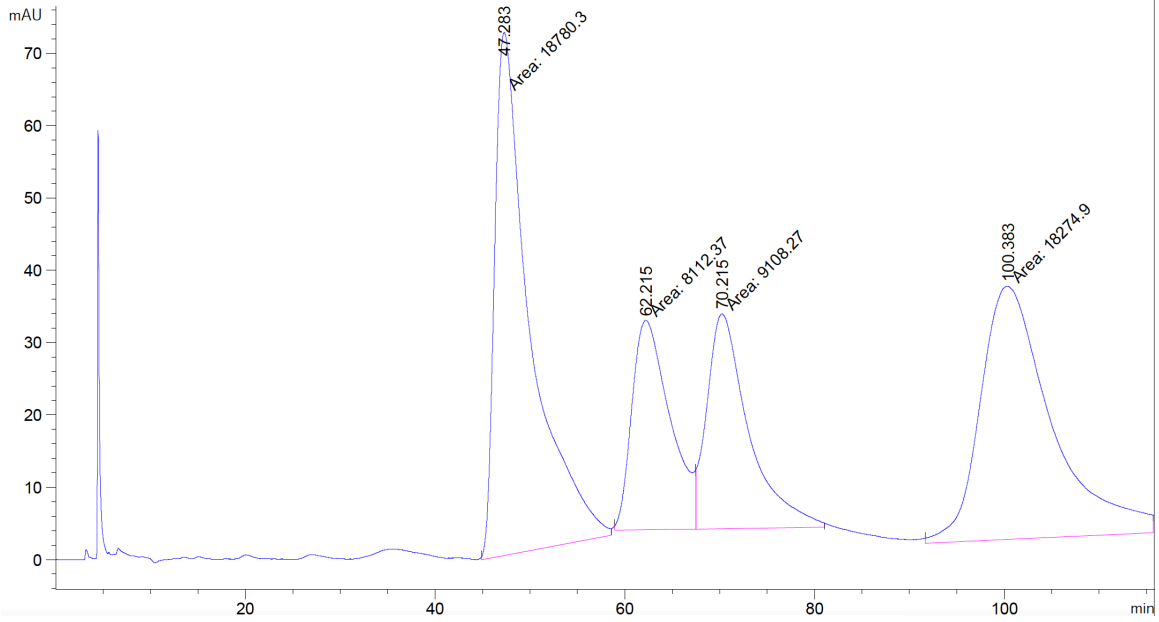

| Peak # | RetTime [min] | Type | Width [min] | Area [mAU*s] | Height [mAU] | Area %  |
|--------|---------------|------|-------------|--------------|--------------|---------|
| 1      | 47.283        | MM   | 4.3284      | 1.87803e4    | 72.31415     | 34.6016 |
| 2      | 62.215        | MF   | 4.6690      | 8112.36768   | 28.95816     | 14.9466 |
| 3      | 70.215        | FM   | 5.1089      | 9108.27344   | 29.71374     | 16.7815 |
| 4      | 100.383       | MM   | 8.6913      | 1.82749e4    | 35.04455     | 33.6704 |

4e

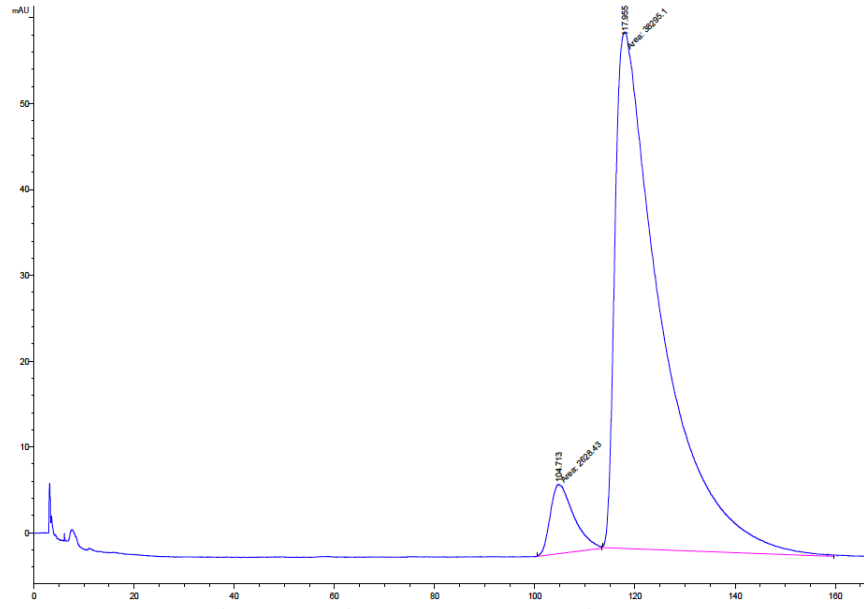

| Peak # | RetTime [min] | Type | Width [min] | Area [mAU*s] | Height [mAU] | Area %  |
|--------|---------------|------|-------------|--------------|--------------|---------|
| 1      | 104.713       | MM   | 5.4283      | 2628.42627   | 8.07008      | 6.4228  |
| 2      | 117.955       | MM   | 10.6149     | 3.82951e4    | 60.12783     | 93.5772 |

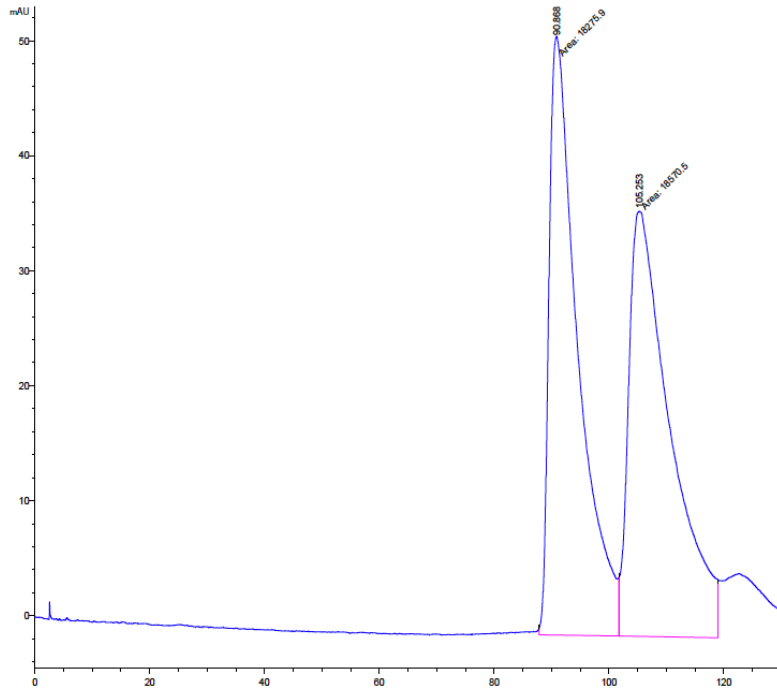

| Peak # | RetTime [min] | Type | Width [min] | Area [mAU*s] | Height [mAU] | Area %  |
|--------|---------------|------|-------------|--------------|--------------|---------|
| 1      | 90.868        | MF   | 5.8046      | 1.80359e4    | 51.78663     | 49.1644 |
| 2      | 105.253       | FM   | 8.4595      | 1.86490e4    | 36.74181     | 50.8356 |

4f

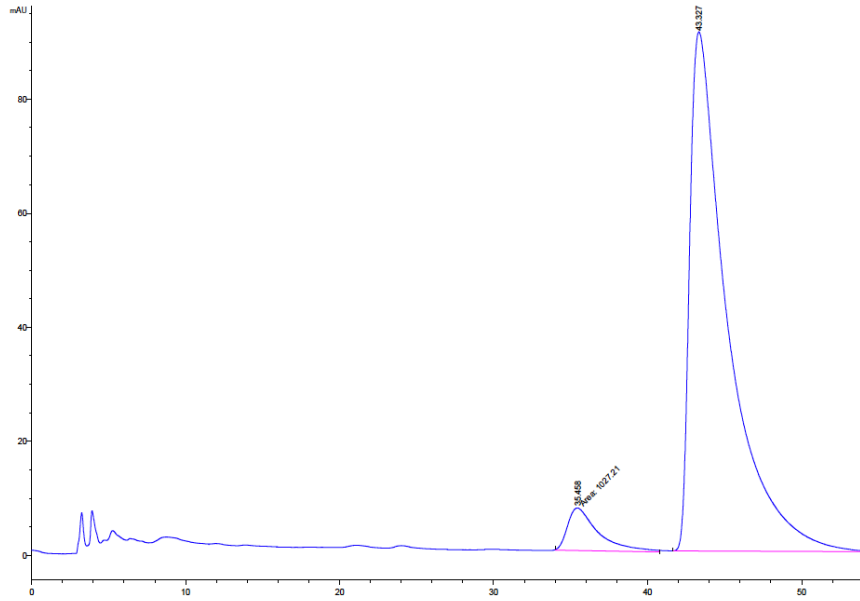

| Peak # | RetTime [min] | Type | Width [min] | Area [mAU*s] | Height [mAU] | Area %  |
|--------|---------------|------|-------------|--------------|--------------|---------|
| 1      | 35.458        | MM   | 2.2995      | 1027.20728   | 7.44506      | 6.2198  |
| 2      | 43.327        | BB   | 2.3473      | 1.54878e4    | 91.01455     | 93.7802 |

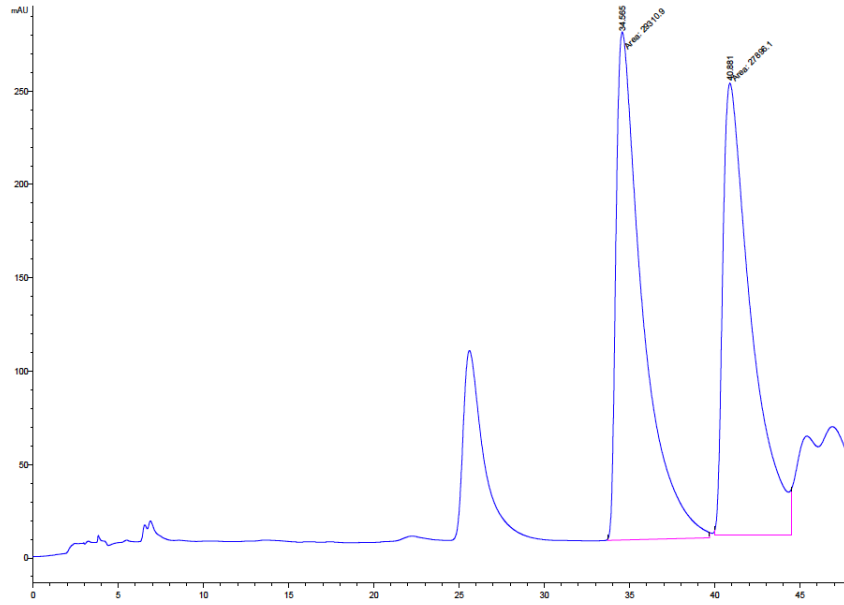

| Peak # | RetTime [min] | Type | Width [min] | Area [mAU*s] | Height [mAU] | Area %  |
|--------|---------------|------|-------------|--------------|--------------|---------|
| 1      | 34.565        | MM   | 1.7962      | 2.93109e4    | 271.96533    | 51.2365 |
| 2      | 40.881        | MM   | 1.9221      | 2.78961e4    | 241.89000    | 48.7635 |

4g

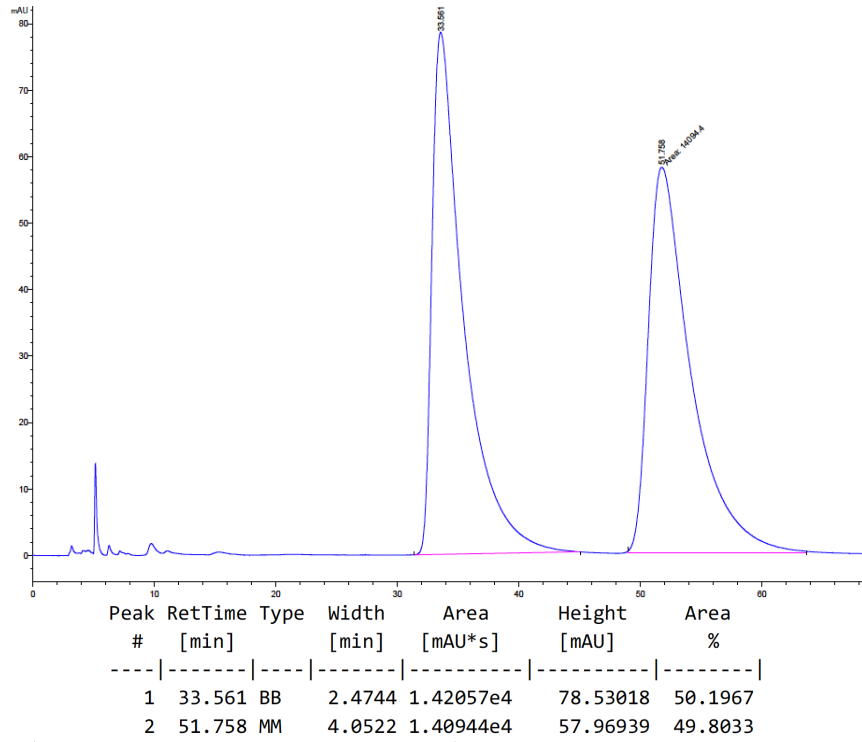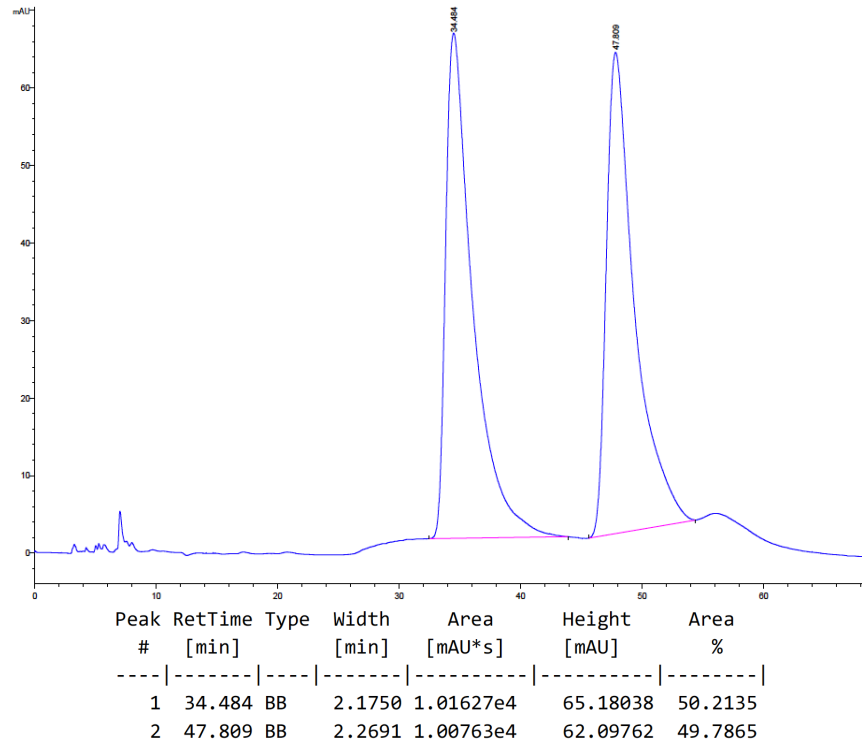

4h

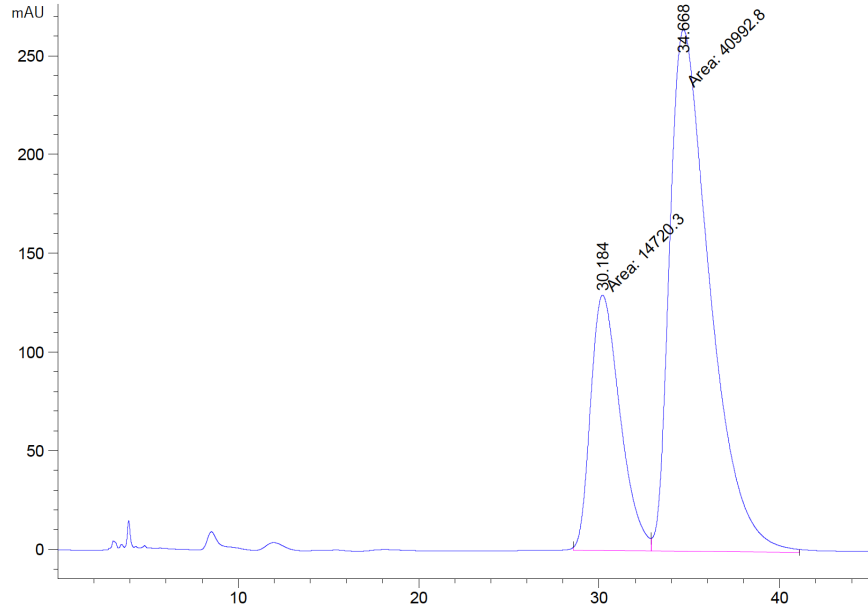

| Peak # | RetTime [min] | Type | Width [min] | Area [mAU*s] | Height [mAU] | Area %  |
|--------|---------------|------|-------------|--------------|--------------|---------|
| 1      | 30.184        | MF   | 1.8963      | 1.47203e4    | 129.37396    | 26.4216 |
| 2      | 34.668        | FM   | 2.5873      | 4.09928e4    | 264.06158    | 73.5784 |

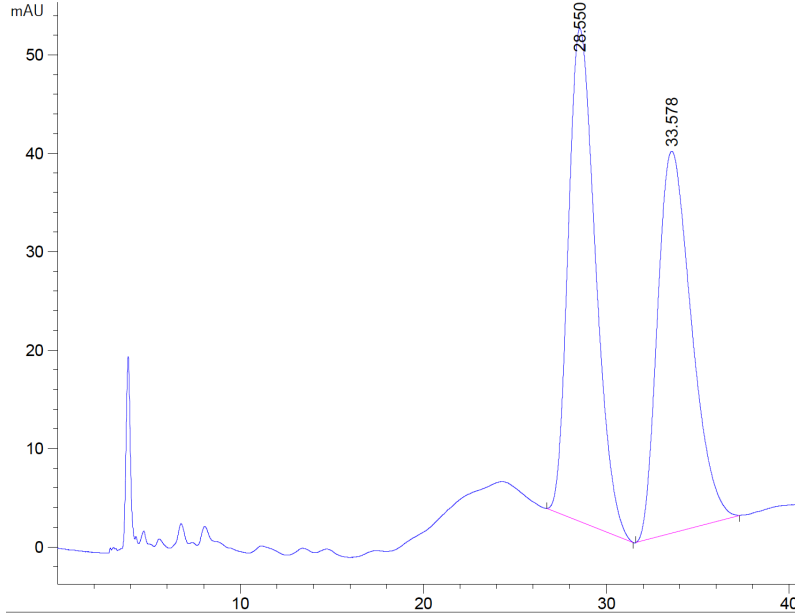

| Peak # | RetTime [min] | Type | Width [min] | Area [mAU*s] | Height [mAU] | Area %  |
|--------|---------------|------|-------------|--------------|--------------|---------|
| 1      | 28.550        | BB   | 1.5488      | 5198.08984   | 50.08681     | 50.9248 |
| 2      | 33.578        | BB   | 1.8639      | 5009.29980   | 38.80861     | 49.0752 |

4i

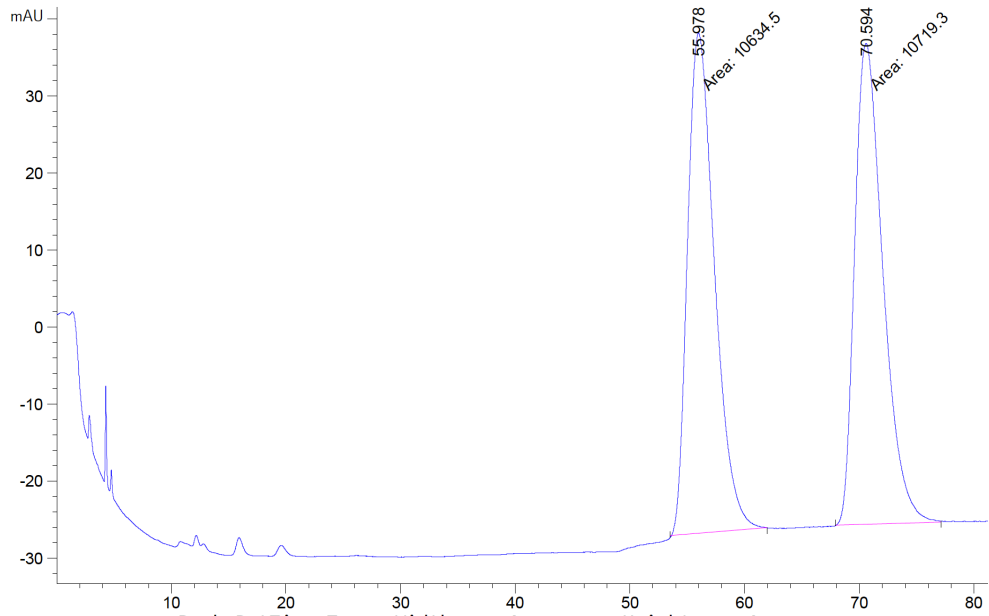

| Peak # | RetTime [min] | Type | Width [min] | Area [mAU*s] | Height [mAU] | Area %  |
|--------|---------------|------|-------------|--------------|--------------|---------|
| 1      | 55.978        | MM   | 2.7289      | 1.06345e4    | 64.95023     | 49.8015 |
| 2      | 70.594        | MM   | 2.8614      | 1.07193e4    | 62.43624     | 50.1985 |

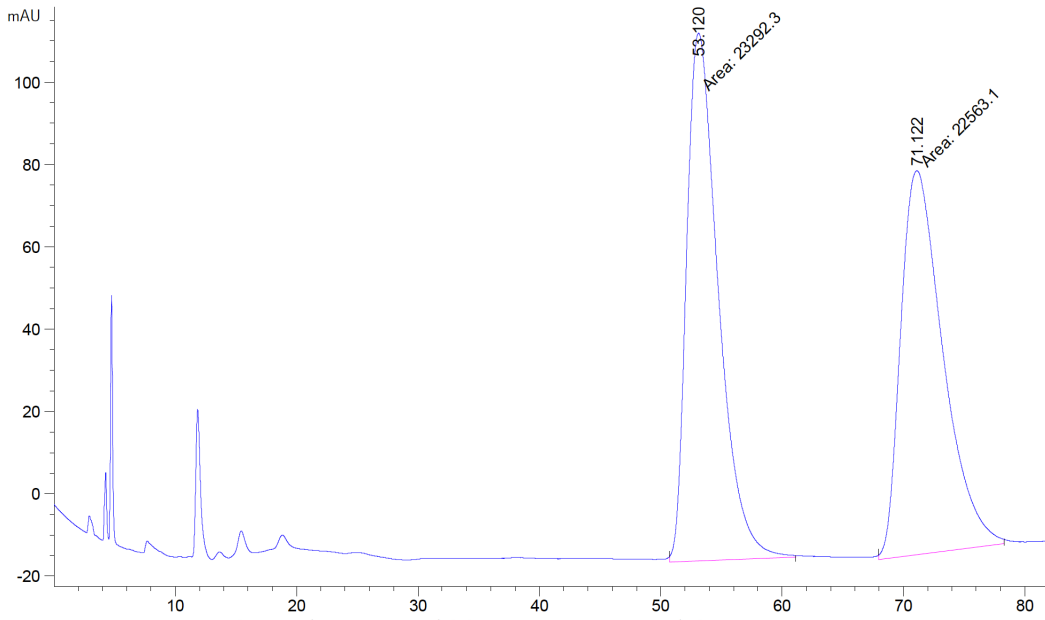

| Peak # | RetTime [min] | Type | Width [min] | Area [mAU*s] | Height [mAU] | Area %  |
|--------|---------------|------|-------------|--------------|--------------|---------|
| 1      | 53.120        | MM   | 3.0277      | 2.32923e4    | 128.21948    | 50.7951 |
| 2      | 71.122        | MM   | 4.0324      | 2.25631e4    | 93.25620     | 49.2049 |

4j

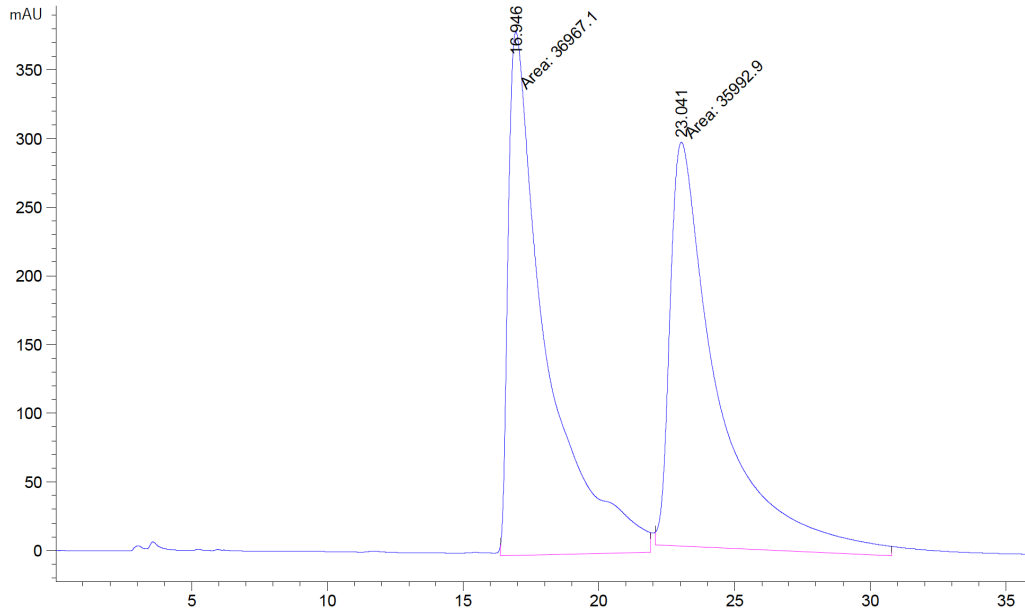

| Peak # | RetTime [min] | Type | Width [min] | Area [mAU*s] | Height [mAU] | Area %  |
|--------|---------------|------|-------------|--------------|--------------|---------|
| 1      | 16.946        | MM   | 1.6148      | 3.69671e4    | 381.54535    | 50.6676 |
| 2      | 23.041        | MM   | 2.0383      | 3.59929e4    | 294.29819    | 49.3324 |

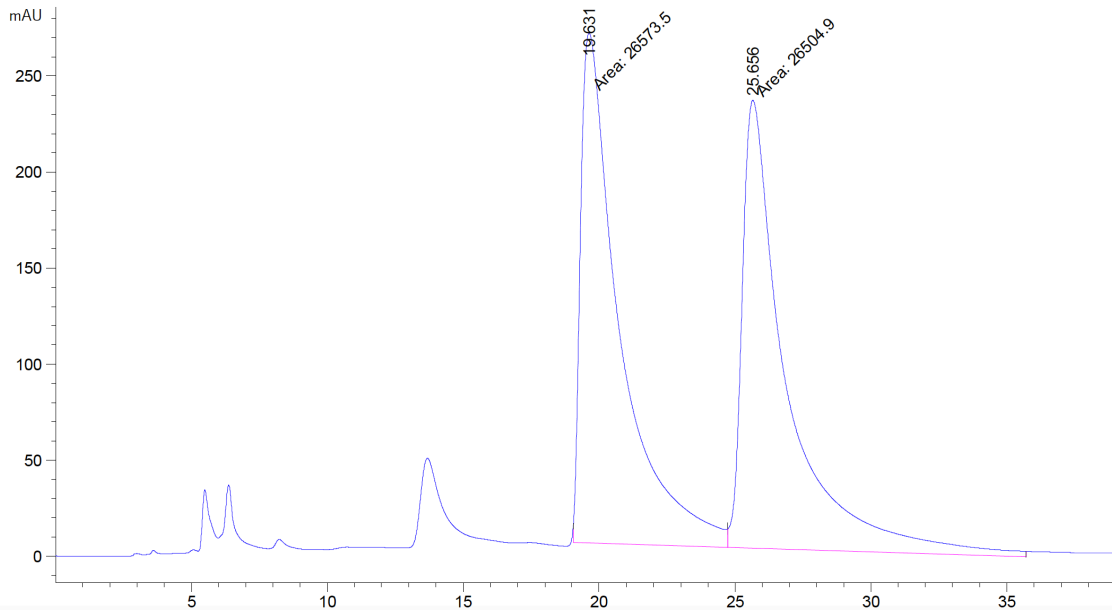

| Peak # | RetTime [min] | Type | Width [min] | Area [mAU*s] | Height [mAU] | Area %  |
|--------|---------------|------|-------------|--------------|--------------|---------|
| 1      | 19.631        | MF   | 1.6675      | 2.65735e4    | 265.60947    | 50.0646 |
| 2      | 25.656        | FM   | 1.8938      | 2.65049e4    | 233.25410    | 49.9354 |

4k

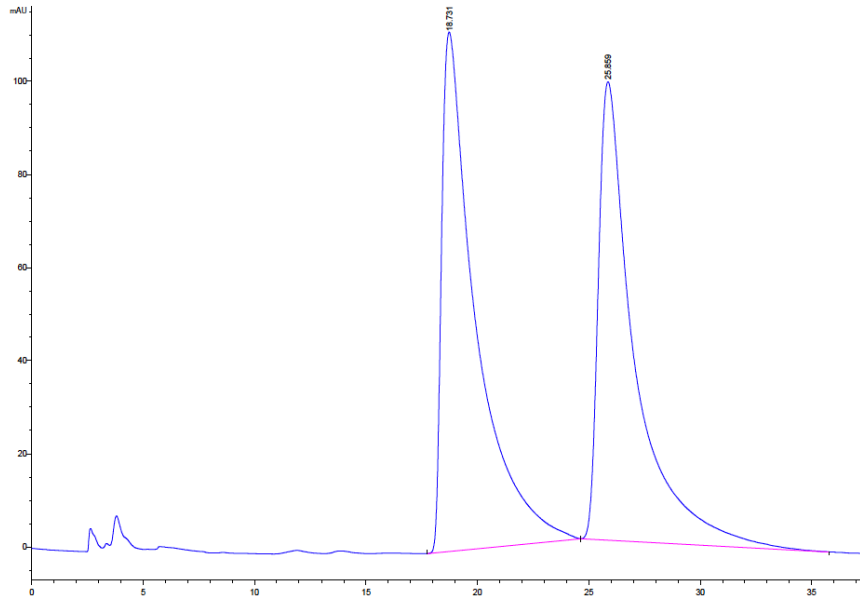

| Peak # | RetTime [min] | Type | Width [min] | Area [mAU*s] | Height [mAU] | Area %  |
|--------|---------------|------|-------------|--------------|--------------|---------|
| 1      | 18.731        | BB   | 1.4632      | 1.18689e4    | 111.55849    | 51.7532 |
| 2      | 25.859        | BB   | 1.5688      | 1.10648e4    | 98.48472     | 48.2468 |

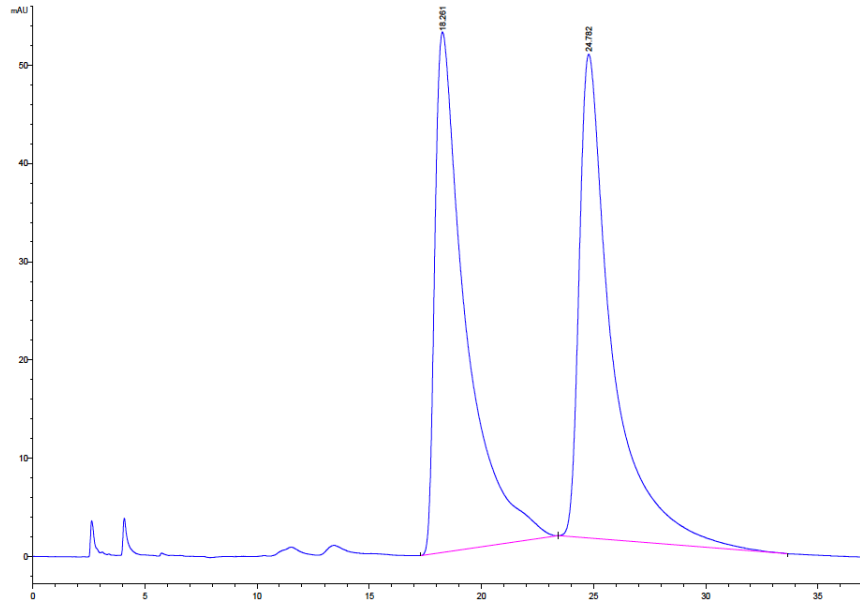

| Peak # | RetTime [min] | Type | Width [min] | Area [mAU*s] | Height [mAU] | Area %  |
|--------|---------------|------|-------------|--------------|--------------|---------|
| 1      | 18.261        | BB   | 1.3325      | 5076.03223   | 52.94718     | 50.4602 |
| 2      | 24.782        | BB   | 1.4289      | 4983.43848   | 49.23272     | 49.5398 |



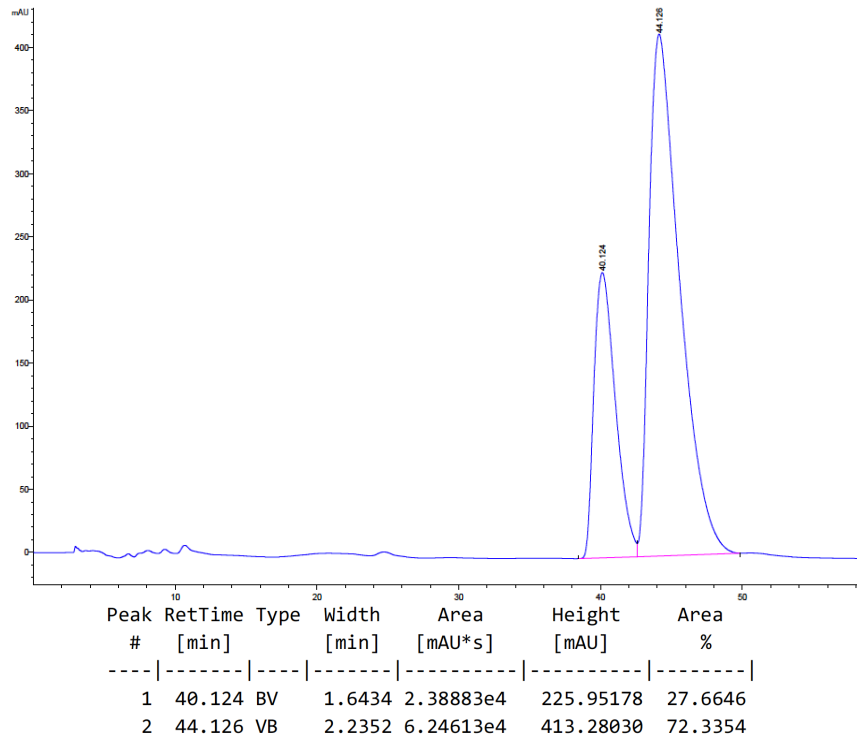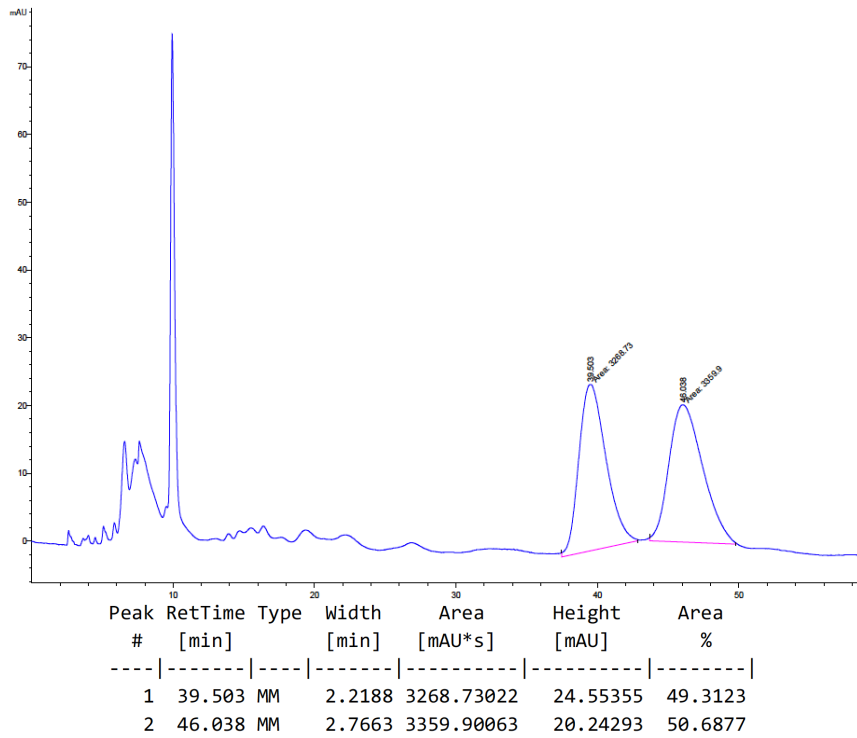

### 5a-B & 5a-L

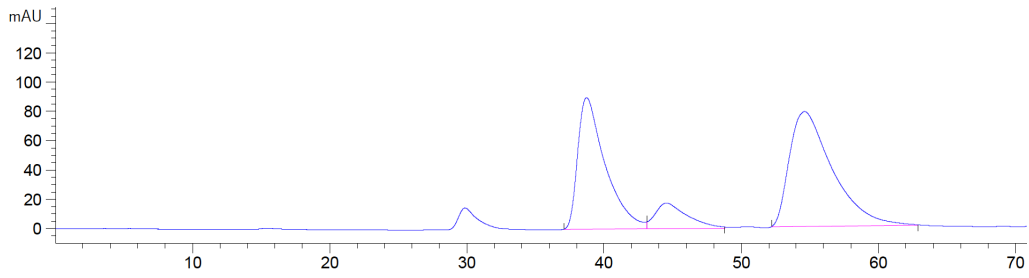

| Peak # | RetTime [min] | Type | Width [min] | Area [mAU*s] | Area %  |
|--------|---------------|------|-------------|--------------|---------|
| 1      | 38.724        | MF   | 2.3311      | 1.25832e4    | 38.6477 |
| 2      | 44.544        | FM   | 2.7008      | 2830.08936   | 8.6923  |
| 3      | 54.610        | MM   | 3.6371      | 1.71454e4    | 52.6600 |

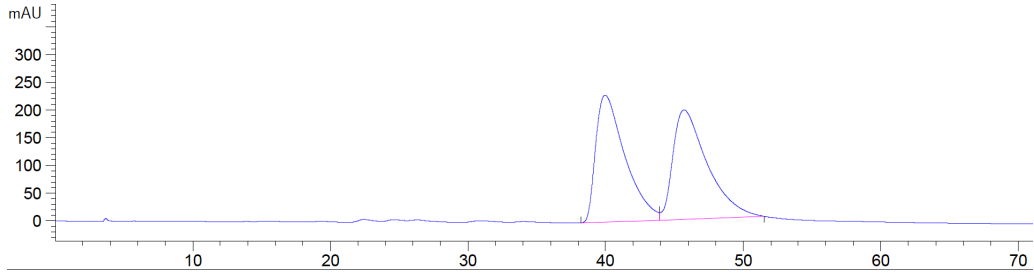

| Peak # | RetTime [min] | Type | Width [min] | Area [mAU*s] | Area %  |
|--------|---------------|------|-------------|--------------|---------|
| 1      | 39.964        | BB   | 2.1645      | 3.39747e4    | 49.6709 |
| 2      | 45.714        | BB   | 2.5028      | 3.44250e4    | 50.3291 |

# 5b-B & 5b-L

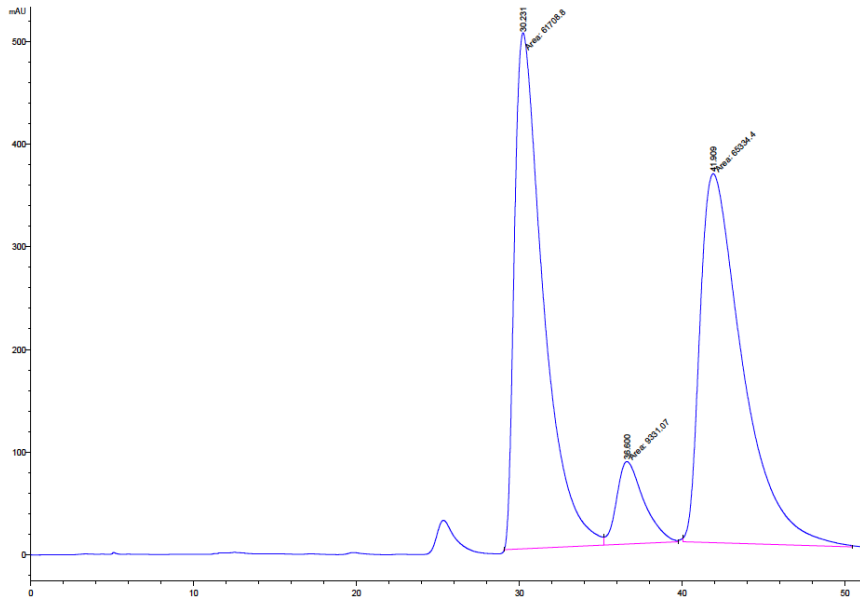

| Peak # | RetTime [min] | Type | Width [min] | Area [mAU*s] | Height [mAU] | Area %  |
|--------|---------------|------|-------------|--------------|--------------|---------|
| 1      | 30.231        | MF T | 2.0475      | 6.17088e4    | 502.31943    | 45.4972 |
| 2      | 36.600        | FM T | 1.9355      | 9331.06641   | 80.34985     | 6.8797  |
| 3      | 41.909        | MM   | 3.0131      | 6.45923e4    | 357.28226    | 47.6231 |

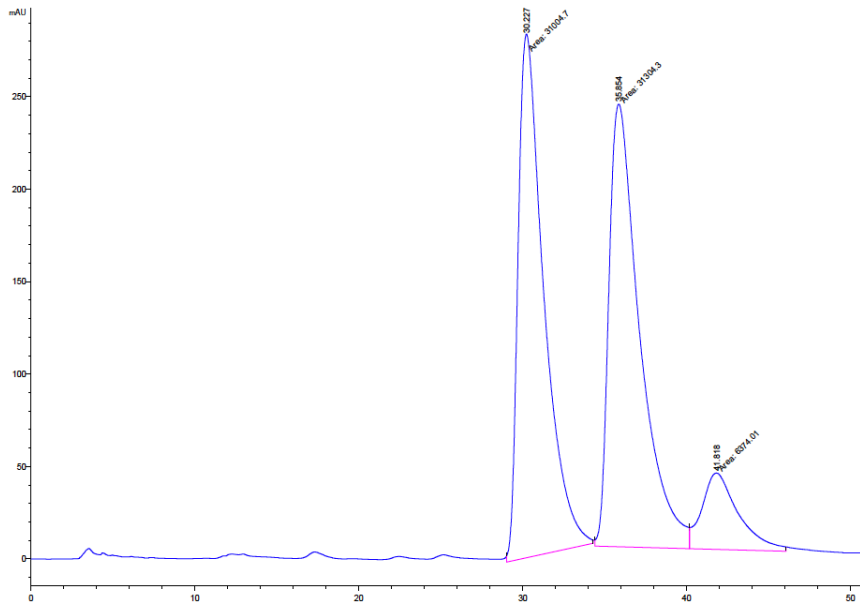

| Peak # | RetTime [min] | Type | Width [min] | Area [mAU*s] | Height [mAU] | Area %  |
|--------|---------------|------|-------------|--------------|--------------|---------|
| 1      | 30.227        | MM   | 1.8257      | 3.10047e4    | 283.03580    | 45.1417 |
| 2      | 35.854        | MF   | 2.1806      | 3.13043e4    | 239.26634    | 45.5780 |
| 3      | 41.818        | FM   | 2.5733      | 6374.00684   | 41.28370     | 9.2803  |

# 5c-B & 5c-L

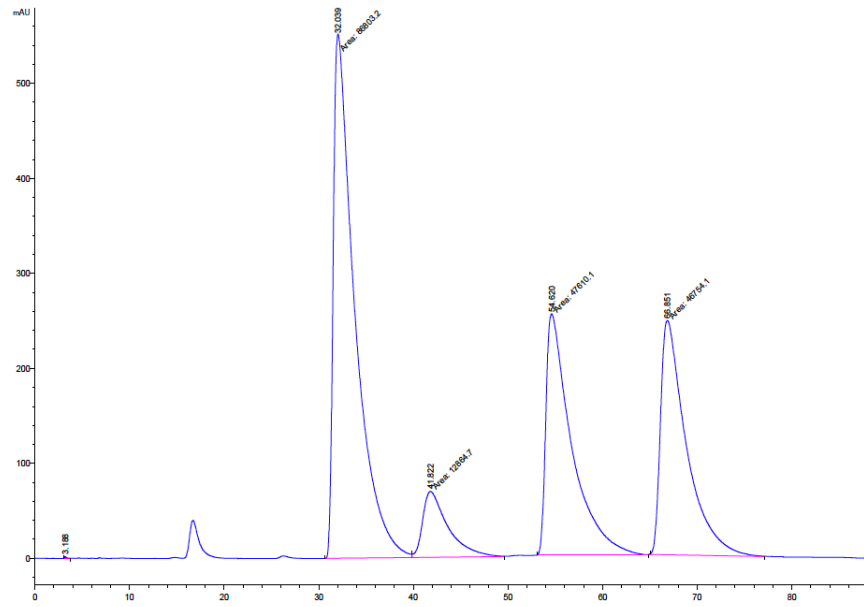

| Peak # | RetTime [min] | Type | Width [min] | Area [mAU*s] | Area %  |
|--------|---------------|------|-------------|--------------|---------|
| 1      | 32.039        | MF   | 2.6227      | 8.68032e4    | 44.7365 |
| 2      | 41.822        | FM   | 3.0935      | 1.28647e4    | 6.6302  |
| 3      | 54.620        | MM   | 3.1261      | 4.76101e4    | 24.5372 |
| 4      | 66.851        | MM   | 3.1580      | 4.67541e4    | 24.0961 |

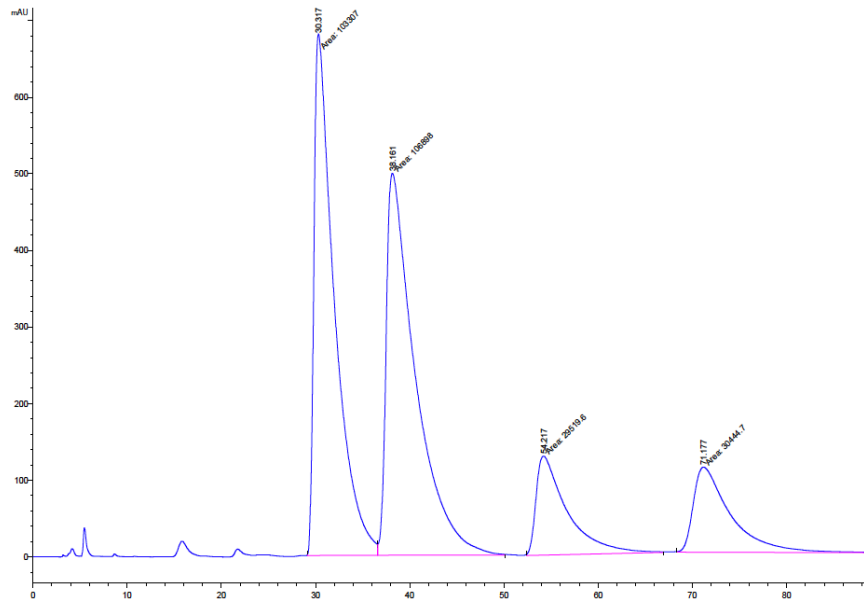

| Peak # | RetTime [min] | Type | Width [min] | Area [mAU*s] | Area %  |
|--------|---------------|------|-------------|--------------|---------|
| 1      | 30.317        | MF   | 2.5296      | 1.03307e5    | 38.2378 |
| 2      | 38.161        | FM   | 3.5726      | 1.06898e5    | 39.5671 |
| 3      | 54.217        | MM   | 3.8122      | 2.95196e4    | 10.9263 |
| 4      | 71.177        | MM   | 4.5691      | 3.04447e4    | 11.2688 |
